# Supplementary material for: Pangenome analysis reveals families of ubiquitin-ligase adaptors as key genomic divergence drivers that lead to hybrid incompatibility
Source: HighWire-hosted journal article supplement (doi:10.1101/gr.280885.125), 2026-02-17
Supplement: Supplemental_Table_S4.xlsx [file Supplemental_Table_S4.xlsx]

## Sheet: Orthogroups
Supplemental Table 4 Number of genes in each orthologous gene family for C. briggsase and C. nigoni strains
	AF16	ED3036	HK104	JU349	QR24	QX1410	VX34	JU1421	EG5268	JU1422	JU2484	JU2617	JU4356	VSL2202	YR106	ZF1220	present in out groups	Type
OG0000000	289	299	64	275	14	234	166	28	3	68	69	67	8	51	63	18	FALSE	Shared Core
OG0000001	28	34	32	29	30	36	29	108	56	98	51	67	88	74	74	95	TRUE	Shared Core
OG0000002	13	17	5	10	17	10	14	82	61	55	84	55	77	46	77	76	TRUE	Shared Core
OG0000003	5	6	7	5	4	7	6	68	51	22	65	66	70	58	70	78	FALSE	Shared Core
OG0000004	6	7	7	7	7	6	8	66	64	60	43	35	66	45	59	55	FALSE	Shared Core
OG0000005	6	7	6	9	10	7	8	63	58	38	65	51	56	34	61	44	TRUE	Shared Core
OG0000006	5	14	15	12	12	9	13	54	51	53	39	46	46	39	44	56	TRUE	Shared Core
OG0000007	9	9	11	10	11	8	11	53	47	53	38	55	42	44	53	54	FALSE	Shared Core
OG0000008	12	18	10	13	12	12	14	44	50	43	42	37	39	39	41	44	FALSE	Shared Core
OG0000009	8	7	9	8	11	6	10	45	33	36	47	38	45	70	42	31	TRUE	Shared Core
OG0000010	4	4	4	4	4	4	4	26	29	32	45	31	47	70	61	34	TRUE	Shared Core
OG0000011	2	3	2	2	2	2	2	46	46	37	53	49	38	44	49	60	TRUE	Shared Core
OG0000012	20	21	19	18	21	22	21	22	28	23	24	25	25	24	21	23	TRUE	Shared Core
OG0000013	15	22	22	17	30	10	14	31	26	30	50	39	27	39	24	27	TRUE	Shared Core
OG0000014	14	5	201	32	0	15	0	28	58	4	3	4	41	1	5	5	FALSE	Cni-unique core
OG0000015	5	8	10	8	7	8	8	35	45	39	45	30	46	29	39	31	TRUE	Shared Core
OG0000016	6	9	8	7	9	8	7	40	26	36	36	30	39	33	38	39	TRUE	Shared Core
OG0000017	5	8	10	7	8	9	10	35	33	29	36	27	41	35	35	39	TRUE	Shared Core
OG0000018	2	2	2	2	2	3	1	34	39	32	54	37	44	35	7	44	FALSE	Shared Core
OG0000019	9	5	6	7	6	7	6	31	33	31	32	23	27	33	35	26	TRUE	Shared Core
OG0000020	17	18	13	15	18	16	14	18	30	18	33	31	20	18	18	27	TRUE	Shared Core
OG0000021	13	11	15	19	13	11	12	17	28	15	34	26	17	31	21	26	TRUE	Shared Core
OG0000022	3	3	3	3	3	4	4	31	33	29	30	34	30	27	36	32	TRUE	Shared Core
OG0000023	6	6	6	7	7	7	6	30	30	30	27	27	37	29	23	40	TRUE	Shared Core
OG0000024	2	3	2	2	3	2	2	30	29	28	32	34	45	28	30	35	TRUE	Shared Core
OG0000025	2	3	2	1	2	3	1	34	40	32	37	41	39	28	6	38	FALSE	Shared Core
OG0000026	3	3	3	3	5	3	3	36	35	19	39	26	25	28	28	31	FALSE	Shared Core
OG0000027	13	11	11	11	13	13	11	19	22	23	20	16	22	17	24	22	TRUE	Shared Core
OG0000028	3	5	5	6	2	5	5	27	42	24	21	24	29	26	31	29	TRUE	Shared Core
OG0000029	12	13	12	11	10	12	11	21	21	20	24	21	19	19	19	18	TRUE	Shared Core
OG0000030	48	45	28	42	29	40	34	1	1	4	1	1	0	2	1	1	FALSE	Cbr-unique core
OG0000031	3	2	2	2	2	2	3	24	36	20	28	27	24	26	27	42	FALSE	Shared Core
OG0000032	13	10	11	12	11	11	11	14	15	16	18	18	18	17	16	22	TRUE	Shared Core
OG0000033	12	14	11	13	11	10	13	25	16	21	24	12	13	21	20	12	TRUE	Shared Core
OG0000034	4	5	7	6	8	5	6	23	41	22	22	22	21	18	21	22	FALSE	Shared Core
OG0000035	9	7	8	9	8	9	6	23	23	19	21	30	16	17	17	26	TRUE	Shared Core
OG0000036	3	4	4	4	4	5	4	29	21	22	28	21	24	25	20	25	FALSE	Shared Core
OG0000037	3	3	4	3	2	2	4	23	35	14	22	18	22	23	26	39	FALSE	Shared Core
OG0000038	1	2	1	1	2	2	2	25	20	29	25	15	22	31	41	23	FALSE	Shared Core
OG0000039	11	11	6	11	11	11	11	13	13	12	12	11	12	11	12	11	TRUE	Shared Core
OG0000040	11	10	11	11	9	11	11	12	12	12	12	12	12	12	12	12	TRUE	Shared Core
OG0000041	0	0	0	1	0	1	0	34	56	32	19	25	13	25	21	10	FALSE	Cni-unique core
OG0000042	5	6	6	7	5	5	6	24	25	23	23	18	20	22	22	17	FALSE	Shared Core
OG0000043	33	34	33	46	28	29	20	0	0	1	1	2	2	2	1	1	FALSE	Cbr-unique core
OG0000044	4	3	5	5	5	4	6	17	31	24	37	14	21	17	19	3	TRUE	Shared Core
OG0000045	5	3	1	3	5	6	8	27	19	17	20	14	22	17	23	37	FALSE	Shared Core
OG0000046	13	19	31	13	19	24	27	12	12	7	12	2	10	8	10	6	FALSE	Shared Core
OG0000047	1	1	5	5	5	1	6	17	14	12	13	13	15	20	24	21	TRUE	Shared Core
OG0000048	7	7	9	9	11	7	9	16	13	17	14	13	25	15	17	11	TRUE	Shared Core
OG0000049	10	9	9	9	9	9	9	9	10	9	10	10	10	11	10	9	TRUE	Shared Core
OG0000050	3	4	2	2	3	3	3	25	18	21	16	24	18	24	17	22	FALSE	Shared Core
OG0000051	9	9	9	10	10	9	10	10	9	10	10	10	9	10	10	9	TRUE	Shared Core
OG0000052	2	2	2	2	2	1	2	17	15	17	19	13	17	19	16	21	TRUE	Shared Core
OG0000053	5	11	12	5	23	19	17	14	12	16	9	16	6	13	8	14	TRUE	Shared Core
OG0000054	2	1	2	1	0	2	1	14	41	20	22	18	17	19	14	26	FALSE	Cni-unique core
OG0000055	1	6	3	1	1	2	3	16	13	15	19	21	14	17	22	27	TRUE	Shared Core
OG0000056	1	1	1	1	0	1	1	18	18	21	17	15	15	18	30	34	FALSE	Cni-unique core
OG0000057	4	4	4	4	4	5	4	19	20	15	22	17	16	17	16	15	FALSE	Shared Core
OG0000058	19	18	17	8	26	24	29	5	9	3	2	3	9	2	6	3	FALSE	Shared Core
OG0000059	6	6	8	9	7	6	6	13	14	13	13	14	20	13	14	21	FALSE	Shared Core
OG0000060	6	7	10	5	5	7	6	13	18	12	22	11	11	7	10	27	TRUE	Shared Core
OG0000061	5	5	5	5	5	5	5	22	9	16	15	25	17	14	15	13	FALSE	Shared Core
OG0000062	0	0	1	2	0	0	0	21	15	17	18	13	14	11	21	14	TRUE	Cni-unique core
OG0000063	3	5	3	4	4	4	4	21	21	8	13	16	15	20	17	20	FALSE	Shared Core
OG0000064	0	0	0	0	0	0	0	8	31	13	32	13	11	10	29	30	FALSE	Cni-specific
OG0000065	6	6	7	7	7	6	7	11	10	12	15	14	11	14	12	12	TRUE	Shared Core
OG0000066	4	5	5	5	4	4	5	13	14	11	15	14	17	18	15	12	TRUE	Shared Core
OG0000067	3	4	0	2	3	3	3	20	19	14	15	14	24	13	17	18	FALSE	Cni-unique core
OG0000068	16	15	22	21	20	15	18	3	2	5	3	5	2	4	2	4	TRUE	Shared Core
OG0000069	21	24	18	24	27	23	23	0	0	2	0	0	0	1	1	1	FALSE	Cbr-unique core
OG0000070	1	2	4	4	4	2	3	13	12	17	15	17	14	15	16	21	TRUE	Shared Core
OG0000071	7	10	7	7	8	6	7	13	9	12	8	20	10	8	18	14	FALSE	Shared Core
OG0000072	6	6	5	6	6	6	6	9	19	10	10	11	12	11	11	17	TRUE	Shared Core
OG0000073	12	15	11	11	14	15	19	8	7	8	8	7	6	8	9	4	FALSE	Shared Core
OG0000074	17	15	16	15	17	12	17	5	5	5	6	6	7	1	4	5	FALSE	Shared Core
OG0000075	22	21	25	22	15	14	17	1	1	2	2	3	2	7	3	0	FALSE	Cbr-unique core
OG0000076	1	1	1	1	2	1	2	17	8	21	10	16	17	13	15	18	TRUE	Shared Core
OG0000077	0	0	0	0	0	0	0	14	27	17	22	14	12	11	18	19	FALSE	Cni-specific
OG0000078	5	7	6	5	4	8	6	6	13	8	16	10	6	11	17	20	FALSE	Shared Core
OG0000079	17	22	18	17	22	19	14	0	1	0	2	0	5	1	2	0	TRUE	Cbr-unique core
OG0000080	17	20	32	16	27	16	15	1	0	2	0	2	1	1	0	2	FALSE	Cbr-unique core
OG0000081	3	3	2	2	3	3	2	18	25	14	15	15	12	8	15	12	FALSE	Shared Core
OG0000082	4	5	5	5	5	5	5	12	11	11	23	11	11	10	15	12	TRUE	Shared Core
OG0000083	1	1	2	3	3	2	2	11	13	16	17	9	16	18	14	22	FALSE	Shared Core
OG0000084	0	0	0	0	0	0	0	17	32	15	18	16	11	15	7	19	FALSE	Cni-specific
OG0000085	2	2	2	2	2	2	2	10	18	16	14	17	10	10	16	11	TRUE	Shared Core
OG0000086	10	12	10	13	11	10	7	9	7	8	13	6	4	10	11	6	FALSE	Shared Core
OG0000087	3	3	3	3	3	3	3	13	27	13	13	10	11	13	14	6	TRUE	Shared Core
OG0000088	2	1	1	1	1	1	0	12	15	12	32	13	13	15	13	14	FALSE	Cni-unique core
OG0000089	16	21	27	17	12	14	15	1	0	0	2	3	3	6	4	1	FALSE	Cbr-unique core
OG0000090	12	14	21	21	25	14	29	1	2	0	0	0	1	2	0	0	FALSE	Cbr-unique core
OG0000091	5	5	5	2	5	5	2	11	12	12	13	11	7	15	8	12	TRUE	Shared Core
OG0000092	2	2	2	2	3	2	3	14	12	12	13	14	14	12	12	13	TRUE	Shared Core
OG0000093	5	5	5	6	5	4	5	12	10	18	10	14	8	12	10	10	FALSE	Shared Core
OG0000094	2	3	3	2	3	3	2	13	14	17	13	13	14	8	14	15	FALSE	Shared Core
OG0000095	3	4	2	2	4	3	0	18	14	8	18	9	9	7	15	23	FALSE	Cni-unique core
OG0000096	14	23	16	18	10	20	10	2	5	0	1	2	0	5	1	4	TRUE	Cbr-unique core
OG0000097	4	5	6	7	4	5	5	8	18	8	17	9	8	8	8	7	TRUE	Shared Core
OG0000098	1	1	1	1	2	1	2	9	22	10	13	8	14	4	5	17	TRUE	Shared Core
OG0000099	5	7	9	9	9	7	8	10	7	8	9	8	7	9	10	10	TRUE	Shared Core
OG0000100	6	8	6	6	6	8	6	7	8	7	9	9	9	9	8	11	TRUE	Shared Core
OG0000101	8	9	8	7	9	8	8	9	8	9	9	7	9	9	8	8	FALSE	Shared Core
OG0000102	6	6	6	6	6	8	6	12	8	12	9	8	10	11	10	9	FALSE	Shared Core
OG0000103	12	12	13	14	13	12	9	7	5	4	1	6	6	8	4	6	FALSE	Shared Core
OG0000104	5	6	7	7	8	8	5	9	7	7	5	9	2	7	4	6	TRUE	Shared Core
OG0000105	2	2	2	2	2	2	2	9	18	9	12	17	12	14	8	15	FALSE	Shared Core
OG0000106	7	7	7	7	7	7	7	8	8	8	9	8	8	8	7	9	TRUE	Shared Core
OG0000107	6	8	6	6	7	6	7	9	10	9	7	8	10	10	8	9	TRUE	Shared Core
OG0000108	3	4	4	4	5	3	5	11	15	9	11	10	7	9	14	9	TRUE	Shared Core
OG0000109	3	3	6	5	2	3	4	10	11	9	10	10	9	16	10	9	TRUE	Shared Core
OG0000110	17	19	20	17	11	12	13	1	0	0	2	4	2	6	1	1	FALSE	Cbr-unique core
OG0000111	1	1	1	1	1	1	1	12	21	11	8	12	10	10	10	12	TRUE	Shared Core
OG0000112	6	6	6	8	7	7	8	7	8	7	15	8	7	7	7	8	TRUE	Shared Core
OG0000113	4	4	7	5	8	7	6	11	10	12	4	2	9	10	9	17	FALSE	Shared Core
OG0000114	4	4	4	4	4	5	3	9	10	7	14	8	9	6	10	8	TRUE	Shared Core
OG0000115	15	18	14	19	21	17	13	1	0	0	1	1	0	0	0	1	FALSE	Cbr-unique core
OG0000116	1	1	3	3	3	1	0	10	19	9	26	9	15	7	6	8	FALSE	Cni-unique core
OG0000117	5	5	7	8	6	6	5	8	6	6	9	9	10	9	10	10	FALSE	Shared Core
OG0000118	0	0	0	0	0	0	0	13	32	9	6	8	11	9	10	13	TRUE	Cni-specific
OG0000119	6	6	6	6	6	6	6	6	6	6	6	6	5	6	6	6	TRUE	Shared Core
OG0000120	3	4	4	4	2	4	4	9	8	10	13	12	9	10	9	10	FALSE	Shared Core
OG0000121	3	4	4	4	4	3	3	12	7	11	7	8	11	10	7	19	FALSE	Shared Core
OG0000122	7	7	3	4	6	6	5	9	7	7	10	8	8	8	8	8	TRUE	Shared Core
OG0000123	6	6	6	6	6	6	6	6	6	6	6	6	6	6	6	6	TRUE	Shared Core
OG0000124	3	6	5	5	5	6	3	3	1	15	2	8	6	22	10	10	TRUE	Shared Core
OG0000125	5	6	5	9	8	4	8	3	8	6	8	6	6	9	7	15	FALSE	Shared Core
OG0000126	1	1	1	1	1	1	1	10	13	13	11	12	13	11	10	14	FALSE	Shared Core
OG0000127	0	0	0	0	0	0	0	12	20	15	5	9	11	10	8	13	TRUE	Cni-specific
OG0000128	0	0	0	0	0	0	0	10	20	8	15	9	11	13	13	13	FALSE	Cni-specific
OG0000129	4	5	5	5	5	4	5	5	8	5	8	6	5	7	7	5	TRUE	Shared Core
OG0000130	1	1	1	1	0	1	1	13	6	10	7	7	17	15	18	9	TRUE	Cni-unique core
OG0000131	4	4	3	4	3	4	3	6	6	9	17	11	7	11	9	7	FALSE	Shared Core
OG0000132	6	6	6	6	5	6	6	6	12	6	11	6	5	6	5	6	TRUE	Shared Core
OG0000133	1	1	1	1	1	1	0	14	13	5	26	10	13	3	10	9	FALSE	Cni-unique core
OG0000134	0	1	0	1	1	0	1	9	9	12	16	11	7	17	14	5	TRUE	Cni-unique core
OG0000135	3	5	6	6	5	4	5	13	8	5	8	8	6	11	7	10	FALSE	Shared Core
OG0000136	2	2	2	3	3	2	2	13	11	16	6	13	5	8	6	11	TRUE	Shared Core
OG0000137	0	0	0	0	0	0	0	11	14	14	2	11	16	11	11	10	TRUE	Cni-specific
OG0000138	13	20	19	13	7	13	8	0	0	0	1	2	3	6	3	0	FALSE	Cbr-unique core
OG0000139	1	3	6	5	4	3	4	8	7	12	7	9	8	9	5	6	FALSE	Shared Core
OG0000140	2	2	1	1	1	2	1	14	7	8	10	10	9	13	10	15	FALSE	Shared Core
OG0000141	5	6	6	7	6	6	5	5	7	6	7	8	7	4	7	10	TRUE	Shared Core
OG0000142	10	13	8	10	19	19	8	1	2	0	3	4	0	1	5	3	FALSE	Cbr-unique core
OG0000143	4	4	4	4	4	4	4	9	10	9	9	7	7	9	9	9	FALSE	Shared Core
OG0000144	0	0	1	2	0	0	2	5	14	7	9	17	7	9	10	7	TRUE	Cni-unique core
OG0000145	9	9	12	12	13	9	11	2	3	5	4	2	3	2	5	3	FALSE	Shared Core
OG0000146	6	4	4	4	3	3	4	6	12	12	5	7	4	7	5	5	TRUE	Shared Core
OG0000147	11	12	10	9	12	12	10	6	2	0	2	3	1	2	10	2	FALSE	Cbr-unique core
OG0000148	6	5	4	3	5	4	4	5	5	6	6	5	6	5	5	6	TRUE	Shared Core
OG0000149	1	1	0	0	0	1	0	9	20	4	21	2	9	4	10	12	TRUE	Cni-unique core
OG0000150	2	4	1	2	2	1	2	8	7	6	11	8	13	7	12	18	FALSE	Shared Core
OG0000151	5	5	4	5	4	4	4	6	6	6	6	7	6	6	6	6	TRUE	Shared Core
OG0000152	2	2	1	1	3	1	1	11	15	9	7	12	10	8	10	11	FALSE	Shared Core
OG0000153	3	3	3	3	2	3	3	12	8	10	7	7	8	8	7	9	TRUE	Shared Core
OG0000154	1	1	3	3	2	1	3	8	8	11	12	9	7	14	11	9	FALSE	Shared Core
OG0000155	4	5	4	3	4	4	5	3	4	3	4	3	3	5	5	4	TRUE	Shared Core
OG0000156	2	2	2	2	2	2	2	10	10	9	15	9	8	6	11	10	FALSE	Shared Core
OG0000157	5	5	5	5	5	5	5	6	6	6	10	7	7	6	6	6	TRUE	Shared Core
OG0000158	4	4	4	4	4	4	4	8	6	8	5	5	7	6	6	8	TRUE	Shared Core
OG0000159	0	0	0	0	0	0	0	0	0	0	0	0	0	0	0	0	FALSE	Cni-specific
OG0000160	5	5	5	5	4	5	5	6	7	6	6	6	6	6	6	6	TRUE	Shared Core
OG0000161	4	4	5	4	4	4	4	7	9	6	6	7	6	6	6	6	TRUE	Shared Core
OG0000162	4	4	4	3	4	4	4	6	6	6	6	6	6	6	6	6	TRUE	Shared Core
OG0000163	5	5	6	7	7	5	5	7	8	7	6	6	6	6	6	7	FALSE	Shared Core
OG0000164	4	4	2	2	1	3	5	5	14	10	9	11	13	1	6	7	TRUE	Shared Core
OG0000165	5	7	7	6	7	7	8	5	5	4	5	4	4	4	5	5	TRUE	Shared Core
OG0000166	2	2	2	2	2	2	2	7	7	8	6	5	8	6	13	9	TRUE	Shared Core
OG0000167	2	3	4	3	3	3	3	5	5	5	7	7	5	8	6	7	TRUE	Shared Core
OG0000168	5	3	3	2	1	9	12	5	1	8	22	8	8	6	3	3	FALSE	Shared Core
OG0000169	5	5	5	5	5	5	5	5	10	5	5	5	5	5	5	10	TRUE	Shared Core
OG0000170	1	3	2	2	1	2	4	5	8	6	8	5	9	6	7	9	TRUE	Shared Core
OG0000171	2	2	3	2	2	2	1	4	6	11	11	6	6	8	5	6	TRUE	Shared Core
OG0000172	0	0	7	7	4	5	11	7	10	3	10	4	5	11	8	3	TRUE	Cni-unique core
OG0000173	10	11	15	15	17	7	22	0	0	0	0	0	1	0	0	0	FALSE	Cbr-unique core
OG0000174	5	5	4	5	5	5	6	6	6	6	6	7	6	6	6	6	TRUE	Shared Core
OG0000175	3	2	4	4	4	6	4	7	12	5	5	5	5	6	5	11	TRUE	Shared Core
OG0000176	0	3	1	2	1	2	0	6	10	6	2	17	20	2	11	14	FALSE	Cni-unique core
OG0000177	5	4	5	5	5	4	4	7	8	7	6	4	2	7	6	7	TRUE	Shared Core
OG0000178	7	6	6	6	6	6	6	6	6	6	6	6	6	6	6	6	FALSE	Shared Core
OG0000179	4	4	3	3	4	4	3	5	6	5	5	5	4	4	6	5	TRUE	Shared Core
OG0000180	1	1	4	4	3	1	4	5	8	6	9	9	6	7	7	20	FALSE	Shared Core
OG0000181	6	6	6	5	6	6	6	5	9	5	7	4	5	6	5	9	FALSE	Shared Core
OG0000182	8	7	2	3	5	7	3	7	10	8	6	5	6	10	4	5	FALSE	Shared Core
OG0000183	5	3	4	4	3	3	3	5	14	6	3	8	15	4	10	6	FALSE	Shared Core
OG0000184	4	5	4	4	6	5	7	5	12	5	10	5	6	6	6	4	FALSE	Shared Core
OG0000185	3	2	2	2	3	2	1	3	8	3	9	3	3	3	6	11	TRUE	Shared Core
OG0000186	4	4	4	4	4	4	4	6	6	6	6	6	6	6	6	6	TRUE	Shared Core
OG0000187	5	5	5	5	5	4	5	5	5	5	5	5	5	5	5	5	TRUE	Shared Core
OG0000188	2	4	2	3	4	5	3	6	8	5	8	8	8	8	9	9	FALSE	Shared Core
OG0000189	1	2	1	1	1	1	1	8	9	7	15	7	5	8	9	5	TRUE	Shared Core
OG0000190	5	5	6	6	6	6	4	6	6	6	5	6	6	9	6	6	FALSE	Shared Core
OG0000191	1	2	2	2	2	2	2	0	9	11	14	8	5	10	9	11	TRUE	Cbr-unique core
OG0000192	1	4	2	3	1	3	1	8	12	7	9	9	7	8	11	6	FALSE	Shared Core
OG0000193	0	0	0	0	0	0	0	0	0	0	0	0	0	0	0	0	TRUE	Cni-specific
OG0000194	3	3	4	4	3	3	4	6	6	4	5	6	5	4	4	7	TRUE	Shared Core
OG0000195	5	9	9	7	9	8	6	5	6	3	2	2	7	1	2	6	TRUE	Shared Core
OG0000196	1	1	1	0	1	1	1	12	15	13	8	9	5	4	4	16	FALSE	Cni-unique core
OG0000197	4	7	4	2	4	4	4	5	5	4	5	7	4	4	4	4	TRUE	Shared Core
OG0000198	4	4	3	3	3	3	4	6	12	6	6	6	6	4	4	8	TRUE	Shared Core
OG0000199	4	5	5	7	7	7	7	6	4	5	7	5	5	4	5	5	TRUE	Shared Core
OG0000200	1	1	1	1	3	1	1	5	11	4	17	8	5	6	14	10	TRUE	Shared Core
OG0000201	4	5	5	5	5	5	5	5	5	5	5	5	5	5	5	5	TRUE	Shared Core
OG0000202	3	3	4	1	2	3	4	9	13	8	5	9	7	6	5	7	TRUE	Shared Core
OG0000203	6	6	18	10	7	5	6	3	4	2	4	3	4	3	3	7	FALSE	Shared Core
OG0000204	4	4	4	4	4	4	5	3	6	5	6	6	5	5	6	5	TRUE	Shared Core
OG0000205	1	1	1	1	1	1	1	6	5	5	7	9	10	11	6	6	TRUE	Shared Core
OG0000206	1	2	2	1	1	1	2	5	10	7	12	5	8	12	8	13	FALSE	Shared Core
OG0000207	2	2	2	3	3	2	4	10	9	7	6	8	6	10	7	9	FALSE	Shared Core
OG0000208	5	4	4	4	4	4	4	5	6	5	5	5	5	5	5	5	TRUE	Shared Core
OG0000209	1	1	1	1	1	1	1	9	5	9	8	7	8	8	7	12	TRUE	Shared Core
OG0000210	5	4	2	2	2	4	3	5	6	6	6	4	7	6	6	10	TRUE	Shared Core
OG0000211	3	4	3	4	4	3	3	5	9	5	4	4	5	5	5	10	TRUE	Shared Core
OG0000212	5	5	4	4	5	5	4	4	4	4	5	5	5	5	4	5	TRUE	Shared Core
OG0000213	0	0	0	0	0	0	0	8	13	9	7	3	13	8	5	10	TRUE	Cni-specific
OG0000214	4	1	0	0	1	4	3	11	9	10	11	4	4	8	9	10	FALSE	Cni-unique core
OG0000215	2	3	4	3	3	3	4	8	8	8	7	7	8	7	8	6	FALSE	Shared Core
OG0000216	0	0	2	1	1	0	0	8	10	8	11	5	8	8	6	13	TRUE	Cni-unique core
OG0000217	3	3	3	3	2	3	4	6	5	6	5	4	5	6	5	9	TRUE	Shared Core
OG0000218	3	4	3	4	4	3	4	5	8	3	5	8	8	3	5	5	TRUE	Shared Core
OG0000219	0	0	0	0	0	0	0	0	0	0	0	0	0	0	0	0	TRUE	Cni-specific
OG0000220	0	0	0	0	0	0	0	14	9	7	9	12	10	6	10	11	FALSE	Cni-specific
OG0000221	6	6	4	5	4	5	5	9	3	6	5	4	6	6	2	2	FALSE	Shared Core
OG0000222	4	4	4	4	4	4	5	4	4	4	10	4	5	5	6	5	TRUE	Shared Core
OG0000223	5	6	4	5	5	5	5	4	8	5	4	5	3	3	4	5	TRUE	Shared Core
OG0000224	5	4	9	11	10	5	6	2	5	2	7	6	1	1	6	5	FALSE	Shared Core
OG0000225	3	3	3	3	3	3	3	5	5	4	6	8	8	4	4	6	TRUE	Shared Core
OG0000226	4	4	4	4	4	4	4	5	6	10	5	5	5	6	6	10	FALSE	Shared Core
OG0000227	3	3	2	2	3	3	3	4	11	6	5	5	5	6	6	8	TRUE	Shared Core
OG0000228	0	1	0	0	0	0	0	9	8	8	8	10	5	4	9	11	TRUE	Cni-unique core
OG0000229	0	0	1	0	0	1	13	1	7	5	11	8	15	10	8	5	FALSE	Cni-unique core
OG0000230	0	0	0	0	0	0	0	13	11	4	4	7	6	7	10	14	TRUE	Cni-specific
OG0000231	0	0	0	0	0	0	0	11	7	14	6	10	11	7	8	10	FALSE	Cni-specific
OG0000232	2	2	2	2	2	2	2	10	8	10	4	6	5	10	4	7	TRUE	Shared Core
OG0000233	1	1	1	1	1	0	2	6	8	6	5	6	7	7	7	8	TRUE	Cni-unique core
OG0000234	2	2	2	2	2	2	2	8	8	4	3	7	2	8	7	6	TRUE	Shared Core
OG0000235	2	2	2	2	1	2	2	8	16	6	6	6	5	6	5	13	FALSE	Shared Core
OG0000236	1	2	3	2	1	2	4	8	9	5	6	6	4	7	6	7	TRUE	Shared Core
OG0000237	4	5	5	5	5	5	5	5	4	5	4	5	5	5	5	4	TRUE	Shared Core
OG0000238	4	5	3	3	3	4	3	4	6	4	9	7	5	7	9	5	FALSE	Shared Core
OG0000239	8	9	9	7	11	8	10	1	4	2	1	1	0	3	1	2	TRUE	Cbr-unique core
OG0000240	2	2	2	2	2	2	2	10	8	9	6	7	5	6	12	6	FALSE	Shared Core
OG0000241	0	0	0	0	0	1	0	4	14	9	8	8	7	7	11	14	FALSE	Cni-unique core
OG0000242	3	3	2	2	4	4	4	9	4	7	5	9	7	6	6	7	FALSE	Shared Core
OG0000243	6	7	5	9	8	7	6	2	6	1	6	4	3	3	5	1	FALSE	Shared Core
OG0000244	4	4	4	4	4	4	4	4	6	4	6	4	4	4	4	5	TRUE	Shared Core
OG0000245	5	3	4	2	1	9	11	5	1	4	11	7	8	5	5	1	FALSE	Shared Core
OG0000246	3	3	4	4	4	3	4	5	6	5	7	5	5	4	5	10	TRUE	Shared Core
OG0000247	4	4	4	4	3	4	4	5	3	3	4	5	5	5	5	5	TRUE	Shared Core
OG0000248	6	2	3	2	2	3	2	5	5	5	5	5	5	5	5	8	TRUE	Shared Core
OG0000249	0	0	0	0	0	0	0	8	8	9	7	8	8	7	7	8	TRUE	Cni-specific
OG0000250	0	1	1	1	1	1	0	11	7	6	16	3	7	6	4	6	TRUE	Cni-unique core
OG0000251	1	1	1	1	1	1	2	6	12	7	7	10	7	8	6	7	FALSE	Shared Core
OG0000252	3	3	4	4	5	4	4	4	5	5	4	4	5	4	4	4	TRUE	Shared Core
OG0000253	6	4	4	3	3	4	4	6	7	5	6	6	7	4	5	4	TRUE	Shared Core
OG0000254	5	4	4	3	4	7	4	6	5	4	3	6	2	4	6	2	TRUE	Shared Core
OG0000255	6	4	12	4	15	10	7	1	6	1	1	1	2	5	1	3	FALSE	Shared Core
OG0000256	4	4	4	4	4	4	4	6	4	4	4	4	3	4	4	5	TRUE	Shared Core
OG0000257	4	4	6	4	5	4	4	4	4	4	8	4	4	4	4	4	TRUE	Shared Core
OG0000258	3	3	3	3	1	3	4	6	7	5	7	6	5	4	7	5	TRUE	Shared Core
OG0000259	1	1	1	1	2	1	1	8	13	7	8	3	6	3	4	13	FALSE	Shared Core
OG0000260	3	3	3	2	3	3	3	4	10	3	5	5	6	5	0	11	TRUE	Cbr-unique core
OG0000261	4	5	4	4	4	6	3	6	5	2	6	4	3	6	6	6	TRUE	Shared Core
OG0000262	0	0	0	0	0	0	0	7	11	7	8	7	9	7	9	8	TRUE	Cni-specific
OG0000263	4	4	3	4	5	5	3	5	5	4	5	6	5	4	7	5	TRUE	Shared Core
OG0000264	3	3	3	3	3	4	3	5	7	6	4	7	5	5	5	4	TRUE	Shared Core
OG0000265	1	2	5	5	5	5	6	5	6	3	4	3	5	4	6	7	TRUE	Shared Core
OG0000266	3	3	3	3	3	4	5	3	10	4	5	5	4	5	4	7	TRUE	Shared Core
OG0000267	1	1	1	1	1	1	1	6	8	8	7	7	7	5	7	8	TRUE	Shared Core
OG0000268	7	11	3	5	9	15	6	4	1	3	2	1	2	1	1	2	TRUE	Shared Core
OG0000269	3	3	2	3	3	3	3	6	7	7	6	6	6	6	7	6	FALSE	Shared Core
OG0000270	1	1	1	1	2	1	3	7	11	6	5	4	8	5	5	5	TRUE	Shared Core
OG0000271	3	3	3	3	3	3	3	6	10	5	7	4	5	5	5	7	FALSE	Shared Core
OG0000272	4	4	4	4	4	4	4	4	4	4	4	5	4	4	4	4	TRUE	Shared Core
OG0000273	2	2	2	2	2	2	2	5	6	7	4	5	6	6	6	6	FALSE	Shared Core
OG0000274	2	2	3	3	3	2	2	4	4	5	5	6	5	9	5	5	TRUE	Shared Core
OG0000275	1	3	2	2	2	3	1	5	5	6	7	6	8	5	6	6	TRUE	Shared Core
OG0000276	5	8	1	3	3	3	1	6	4	5	1	7	6	2	5	3	TRUE	Shared Core
OG0000277	2	2	2	3	2	2	2	6	6	6	9	6	6	8	6	6	FALSE	Shared Core
OG0000278	4	3	4	4	4	4	3	4	4	4	4	4	7	4	4	4	TRUE	Shared Core
OG0000279	3	3	3	3	3	3	3	5	6	7	3	3	3	5	7	7	TRUE	Shared Core
OG0000280	0	1	0	0	0	0	0	6	7	6	10	4	6	6	10	11	FALSE	Cni-unique core
OG0000281	0	0	0	0	0	0	0	6	13	11	10	10	4	6	8	7	FALSE	Cni-specific
OG0000282	0	0	0	0	0	0	0	4	10	4	8	5	8	9	15	13	FALSE	Cni-specific
OG0000283	4	4	2	3	4	5	3	3	8	5	5	6	5	6	6	5	FALSE	Shared Core
OG0000284	4	3	3	3	7	4	4	4	5	4	5	3	4	3	8	3	TRUE	Shared Core
OG0000285	4	4	4	4	4	4	4	4	4	4	6	5	4	6	4	10	FALSE	Shared Core
OG0000286	3	4	4	4	4	4	4	3	5	4	5	4	4	4	4	5	TRUE	Shared Core
OG0000287	1	1	2	2	1	1	1	11	7	7	5	6	5	9	7	7	FALSE	Shared Core
OG0000288	0	1	1	1	1	1	1	7	6	6	6	7	7	7	6	7	TRUE	Cni-unique core
OG0000289	4	4	4	4	4	4	4	4	4	4	4	4	4	4	4	4	TRUE	Shared Core
OG0000290	3	3	4	3	2	3	3	5	5	5	5	5	4	5	7	5	TRUE	Shared Core
OG0000291	3	2	2	2	3	2	3	3	3	1	3	2	2	3	3	4	TRUE	Shared Core
OG0000292	1	1	1	1	1	1	1	7	7	7	10	7	6	6	6	5	TRUE	Shared Core
OG0000293	1	1	2	1	1	1	2	2	3	4	3	3	3	3	2	4	TRUE	Shared Core
OG0000294	2	2	2	2	2	2	2	4	7	3	6	2	3	5	4	7	TRUE	Shared Core
OG0000295	1	2	2	2	2	2	2	7	8	7	7	3	4	7	7	6	TRUE	Shared Core
OG0000296	2	4	4	5	5	4	5	4	7	4	3	5	3	3	4	4	TRUE	Shared Core
OG0000297	3	4	3	3	2	3	2	4	7	5	4	5	4	4	4	7	TRUE	Shared Core
OG0000298	0	0	0	0	0	0	0	10	8	9	5	7	3	7	9	9	TRUE	Cni-specific
OG0000299	0	3	1	0	3	0	7	7	6	9	7	8	8	2	6	5	FALSE	Cni-unique core
OG0000300	10	7	9	10	7	13	5	3	1	1	0	1	1	1	0	3	FALSE	Cbr-unique core
OG0000301	2	2	2	2	1	2	2	6	6	4	7	4	7	6	7	6	TRUE	Shared Core
OG0000302	6	6	5	5	4	6	5	6	4	3	2	3	3	5	6	4	FALSE	Shared Core
OG0000303	6	4	4	4	5	5	4	4	3	1	2	4	4	7	6	3	FALSE	Shared Core
OG0000304	1	1	1	1	1	1	1	9	9	9	6	8	6	9	7	3	FALSE	Shared Core
OG0000305	2	2	2	2	2	2	2	4	10	4	4	4	5	8	5	12	TRUE	Shared Core
OG0000306	2	2	2	2	3	2	2	5	6	6	7	8	6	5	7	7	FALSE	Shared Core
OG0000307	3	3	2	2	2	3	2	5	6	5	6	4	5	7	8	6	TRUE	Shared Core
OG0000308	3	3	2	2	3	3	2	3	7	5	4	4	4	4	4	8	TRUE	Shared Core
OG0000309	1	5	3	4	4	4	4	3	4	5	3	4	3	3	3	3	TRUE	Shared Core
OG0000310	3	3	3	3	3	3	2	4	4	4	4	4	3	3	5	3	TRUE	Shared Core
OG0000311	3	4	4	4	4	4	4	3	3	3	4	2	4	4	3	4	TRUE	Shared Core
OG0000312	1	1	1	1	1	1	1	5	7	6	7	5	10	7	7	7	TRUE	Shared Core
OG0000313	4	4	3	4	4	4	4	4	4	4	4	4	4	4	4	4	TRUE	Shared Core
OG0000314	1	1	2	2	2	2	1	6	7	6	12	5	5	6	6	7	FALSE	Shared Core
OG0000315	2	2	5	2	3	2	2	5	7	6	4	4	2	7	7	5	TRUE	Shared Core
OG0000316	0	0	0	0	0	0	0	0	0	0	0	0	0	0	0	0	TRUE	Cni-specific
OG0000317	0	0	0	0	0	0	0	10	5	3	7	12	5	7	9	6	TRUE	Cni-specific
OG0000318	4	3	3	3	3	4	3	4	4	4	4	4	4	4	4	3	TRUE	Shared Core
OG0000319	2	3	3	2	4	3	3	4	6	5	4	4	4	4	4	7	TRUE	Shared Core
OG0000320	4	4	4	4	3	4	3	4	4	4	4	3	4	3	4	4	TRUE	Shared Core
OG0000321	1	2	2	2	2	2	2	4	5	3	4	4	1	3	4	5	TRUE	Shared Core
OG0000322	0	0	0	0	0	0	0	9	5	6	8	7	13	3	11	8	FALSE	Cni-specific
OG0000323	1	11	13	4	3	11	5	2	2	1	1	1	2	3	2	1	TRUE	Shared Core
OG0000324	4	3	3	4	3	3	3	4	4	3	3	4	4	4	4	4	TRUE	Shared Core
OG0000325	4	4	8	8	7	4	7	3	3	1	3	3	3	3	3	3	FALSE	Shared Core
OG0000326	1	1	1	1	1	1	1	8	15	6	6	5	6	5	5	5	FALSE	Shared Core
OG0000327	2	2	2	2	2	2	2	3	4	4	9	7	9	2	1	7	FALSE	Shared Core
OG0000328	2	1	1	1	1	2	1	6	7	6	5	8	7	5	7	7	TRUE	Shared Core
OG0000329	2	2	3	3	3	2	3	5	5	4	4	4	4	4	4	4	TRUE	Shared Core
OG0000330	9	11	4	4	3	13	13	0	0	0	3	3	1	1	2	0	FALSE	Cbr-unique core
OG0000331	6	4	5	7	6	3	6	2	2	3	3	3	5	3	2	3	FALSE	Shared Core
OG0000332	4	4	4	4	4	4	5	4	4	4	4	4	4	3	4	4	TRUE	Shared Core
OG0000333	1	1	1	1	1	1	1	6	9	3	6	8	6	3	3	11	TRUE	Shared Core
OG0000334	0	0	0	0	0	0	0	6	6	6	8	8	8	7	7	11	FALSE	Cni-specific
OG0000335	3	4	4	4	4	3	4	4	4	4	4	4	4	4	4	4	TRUE	Shared Core
OG0000336	5	7	7	8	11	6	9	1	2	0	1	1	1	0	1	2	TRUE	Cbr-unique core
OG0000337	5	4	4	4	3	4	5	4	6	4	4	4	4	3	4	5	FALSE	Shared Core
OG0000338	1	0	1	1	1	1	0	8	8	9	7	4	7	6	6	6	FALSE	Cni-unique core
OG0000339	1	1	1	1	1	1	1	3	4	8	1	6	6	4	3	7	TRUE	Shared Core
OG0000340	1	1	1	1	1	1	1	4	9	8	5	8	6	6	6	8	FALSE	Shared Core
OG0000341	1	3	3	4	3	3	3	3	2	3	6	4	2	3	4	9	TRUE	Shared Core
OG0000342	4	5	6	4	2	4	4	2	6	5	4	5	3	1	6	4	TRUE	Shared Core
OG0000343	0	1	2	2	3	2	0	8	6	7	6	5	5	3	8	4	TRUE	Cni-unique core
OG0000344	3	3	3	3	3	3	4	4	4	4	4	4	4	4	5	4	TRUE	Shared Core
OG0000345	4	8	5	3	2	2	3	2	2	5	6	4	5	9	0	3	TRUE	Cbr-unique core
OG0000346	2	2	2	2	2	1	2	5	10	6	5	4	8	5	4	6	FALSE	Shared Core
OG0000347	3	3	3	2	2	2	3	5	3	5	8	9	6	5	4	3	FALSE	Shared Core
OG0000348	1	1	1	0	1	1	1	6	13	4	3	5	5	9	10	4	FALSE	Cni-unique core
OG0000349	3	3	3	3	3	3	3	4	6	4	4	4	4	4	4	4	TRUE	Shared Core
OG0000350	3	3	2	2	3	5	3	4	4	4	4	6	4	4	4	7	TRUE	Shared Core
OG0000351	4	3	4	4	4	4	4	4	5	4	4	5	4	4	4	3	FALSE	Shared Core
OG0000352	5	3	4	3	2	3	3	5	9	4	5	2	1	5	4	2	TRUE	Shared Core
OG0000353	1	1	3	3	3	0	0	1	11	5	8	3	3	9	6	4	TRUE	Cni-unique core
OG0000354	3	2	2	3	2	4	2	4	11	4	4	4	7	4	6	3	FALSE	Shared Core
OG0000355	4	3	3	3	3	3	3	3	3	3	3	4	3	3	3	2	TRUE	Shared Core
OG0000356	3	3	2	1	4	2	3	5	5	5	5	5	5	5	5	5	FALSE	Shared Core
OG0000357	1	1	1	1	1	1	1	8	5	8	10	5	6	6	5	5	FALSE	Shared Core
OG0000358	3	3	4	3	3	3	3	3	4	3	5	3	3	4	3	6	TRUE	Shared Core
OG0000359	2	2	2	2	2	1	2	3	4	4	5	7	4	7	4	8	TRUE	Shared Core
OG0000360	1	1	0	0	1	0	1	2	10	6	7	10	10	4	8	4	FALSE	Cni-unique core
OG0000361	4	3	3	3	3	2	3	6	6	4	4	4	4	5	5	6	FALSE	Shared Core
OG0000362	2	2	2	1	1	2	2	6	10	5	5	6	5	5	5	4	FALSE	Shared Core
OG0000363	0	1	0	0	0	0	1	8	3	4	6	4	3	5	4	17	TRUE	Cni-unique core
OG0000364	0	0	0	0	0	0	0	6	6	3	6	5	6	4	6	6	TRUE	Cni-specific
OG0000365	3	3	3	3	3	3	3	4	4	5	4	4	2	4	4	4	TRUE	Shared Core
OG0000366	3	2	5	5	7	4	12	3	3	0	1	2	7	6	2	2	FALSE	Cbr-unique core
OG0000367	2	3	3	2	2	3	2	6	5	7	4	4	5	4	7	5	FALSE	Shared Core
OG0000368	2	2	2	2	2	2	2	5	5	5	4	7	5	5	5	5	TRUE	Shared Core
OG0000369	1	3	3	2	2	2	1	3	4	8	1	9	2	11	1	0	TRUE	Cbr-unique core
OG0000370	2	3	3	1	4	3	2	3	6	3	4	4	4	3	4	6	TRUE	Shared Core
OG0000371	2	3	3	3	2	4	2	5	7	1	3	3	8	5	4	6	FALSE	Shared Core
OG0000372	0	0	1	0	0	0	0	9	3	10	14	10	7	3	4	3	FALSE	Cni-unique core
OG0000373	0	0	0	0	0	0	0	7	7	3	10	8	7	1	7	14	FALSE	Cni-specific
OG0000374	0	0	0	0	1	0	63	0	0	0	0	0	0	0	0	0	FALSE	Cbr-specific
OG0000375	2	3	3	3	3	3	3	2	3	4	3	3	4	3	3	3	TRUE	Shared Core
OG0000376	3	3	3	3	3	3	4	5	4	3	3	5	3	4	4	3	TRUE	Shared Core
OG0000377	2	2	3	3	3	2	2	5	3	4	6	5	5	4	7	5	FALSE	Shared Core
OG0000378	4	4	4	3	3	4	4	3	3	3	2	3	2	4	4	4	TRUE	Shared Core
OG0000379	2	2	2	2	2	2	2	3	5	6	3	3	3	4	3	3	TRUE	Shared Core
OG0000380	3	2	4	4	3	4	2	3	4	4	5	4	3	4	4	3	TRUE	Shared Core
OG0000381	2	3	3	2	3	2	3	4	6	4	5	3	4	4	4	5	TRUE	Shared Core
OG0000382	2	2	1	1	1	2	1	5	10	5	9	5	4	5	4	6	FALSE	Shared Core
OG0000383	0	2	2	2	2	1	2	8	4	10	6	4	6	7	0	6	FALSE	Dispensable
OG0000384	0	0	0	0	0	0	0	0	0	0	0	0	0	0	0	0	TRUE	Cni-specific
OG0000385	0	0	0	0	0	0	0	10	2	6	9	6	7	12	7	4	FALSE	Cni-specific
OG0000386	3	3	3	3	3	3	3	3	3	3	3	4	3	3	4	3	TRUE	Shared Core
OG0000387	3	3	3	3	3	3	2	4	4	4	4	4	4	4	4	4	TRUE	Shared Core
OG0000388	3	3	3	3	3	3	3	3	3	5	5	5	4	5	4	5	TRUE	Shared Core
OG0000389	1	1	1	1	1	1	1	3	3	3	9	5	4	2	4	6	TRUE	Shared Core
OG0000390	2	2	1	2	1	2	2	3	5	6	7	3	5	6	4	5	TRUE	Shared Core
OG0000391	3	3	3	3	3	3	3	4	7	4	4	4	2	5	4	5	FALSE	Shared Core
OG0000392	3	3	3	3	3	3	3	4	4	4	4	5	5	4	4	4	TRUE	Shared Core
OG0000393	3	3	2	2	2	3	2	5	5	4	4	5	5	4	5	6	FALSE	Shared Core
OG0000394	3	3	3	3	3	3	4	3	6	3	3	3	3	3	3	2	TRUE	Shared Core
OG0000395	2	2	1	1	0	2	0	6	6	3	8	6	5	7	4	9	FALSE	Cni-unique core
OG0000396	0	0	0	0	0	0	0	0	0	0	0	0	1	0	0	0	TRUE	Cni-specific
OG0000397	0	0	0	0	0	0	0	5	11	5	6	3	4	7	8	9	TRUE	Cni-specific
OG0000398	0	1	1	1	1	1	1	4	12	6	4	5	7	6	8	4	FALSE	Cni-unique core
OG0000399	0	0	0	0	0	0	0	5	8	5	5	9	4	13	7	6	FALSE	Cni-specific
OG0000400	4	4	4	4	4	4	4	3	4	4	4	3	4	3	4	4	FALSE	Shared Core
OG0000401	3	2	3	3	3	3	2	2	2	2	2	4	3	3	2	4	TRUE	Shared Core
OG0000402	1	2	0	0	1	2	1	5	5	7	7	5	2	5	6	3	TRUE	Cni-unique core
OG0000403	3	3	3	2	2	3	3	9	1	3	1	9	2	0	14	2	FALSE	Cbr-unique core
OG0000404	3	3	3	3	3	3	3	3	5	3	3	3	3	3	3	6	TRUE	Shared Core
OG0000405	2	2	2	2	2	2	2	0	4	6	5	1	3	5	6	8	TRUE	Cbr-unique core
OG0000406	4	4	1	1	1	4	1	5	4	5	5	5	5	6	4	6	FALSE	Shared Core
OG0000407	2	2	1	2	1	2	1	4	7	3	4	5	7	4	4	4	TRUE	Shared Core
OG0000408	2	3	4	2	5	4	2	7	2	3	5	2	4	3	5	5	FALSE	Shared Core
OG0000409	2	3	2	2	2	3	2	2	9	4	3	4	4	5	4	5	TRUE	Shared Core
OG0000410	3	3	3	3	3	3	5	8	2	7	2	2	2	2	2	2	TRUE	Shared Core
OG0000411	1	2	1	1	1	1	2	3	5	3	3	3	3	3	3	4	TRUE	Shared Core
OG0000412	0	0	0	0	0	0	0	6	6	6	6	6	6	7	6	6	TRUE	Cni-specific
OG0000413	0	0	0	0	0	0	0	7	11	5	6	6	5	4	6	11	FALSE	Cni-specific
OG0000414	0	0	0	0	0	0	0	8	5	6	7	5	13	4	8	5	FALSE	Cni-specific
OG0000415	0	0	14	4	3	0	33	0	1	0	2	0	1	0	0	3	FALSE	Dispensable
OG0000416	0	0	0	0	0	0	0	0	0	0	0	0	0	0	0	0	FALSE	Cni-specific
OG0000417	3	3	3	3	3	3	3	3	3	3	3	3	2	3	3	4	TRUE	Shared Core
OG0000418	3	2	3	3	3	3	3	3	3	3	3	3	3	3	3	3	TRUE	Shared Core
OG0000419	3	3	2	3	3	3	3	3	3	3	3	3	3	3	3	3	TRUE	Shared Core
OG0000420	11	12	7	6	7	6	6	0	0	1	1	1	1	0	0	0	FALSE	Cbr-unique core
OG0000421	1	1	1	1	0	1	2	7	5	7	6	4	7	5	7	4	FALSE	Cni-unique core
OG0000422	2	1	2	2	1	2	1	7	6	4	7	3	4	7	5	6	FALSE	Shared Core
OG0000423	3	3	3	2	3	3	2	3	5	3	7	5	6	3	4	5	FALSE	Shared Core
OG0000424	2	2	2	1	2	2	2	3	6	3	4	6	4	3	2	7	TRUE	Shared Core
OG0000425	2	3	3	3	3	3	3	3	7	4	4	7	3	3	3	6	FALSE	Shared Core
OG0000426	3	4	3	3	3	3	3	3	5	3	3	3	3	2	3	4	TRUE	Shared Core
OG0000427	2	3	2	2	4	4	3	4	3	4	4	0	6	3	5	7	TRUE	Cbr-unique core
OG0000428	1	0	7	3	5	3	3	4	1	6	3	7	3	6	6	1	FALSE	Cni-unique core
OG0000429	2	3	3	4	3	3	4	4	3	3	3	4	2	3	4	2	TRUE	Shared Core
OG0000430	1	2	2	2	0	2	2	6	5	5	4	4	3	7	9	5	FALSE	Cni-unique core
OG0000431	1	3	8	4	2	2	10	4	3	4	5	5	1	2	4	0	FALSE	Cbr-unique core
OG0000432	2	3	2	3	3	2	3	1	1	3	2	3	2	2	4	1	TRUE	Shared Core
OG0000433	3	3	3	2	2	3	2	4	5	3	2	3	3	3	4	7	TRUE	Shared Core
OG0000434	3	4	4	4	4	4	4	3	2	3	3	1	4	3	3	3	TRUE	Shared Core
OG0000435	3	3	3	3	3	3	3	3	3	3	3	3	3	3	3	4	TRUE	Shared Core
OG0000436	1	2	2	2	2	2	1	5	3	4	5	2	3	4	4	7	TRUE	Shared Core
OG0000437	2	3	3	3	3	3	3	1	4	1	4	1	2	2	2	4	TRUE	Shared Core
OG0000438	4	3	4	3	3	3	3	3	5	3	5	3	4	4	2	3	TRUE	Shared Core
OG0000439	1	0	1	0	1	2	2	5	6	5	4	8	3	3	2	10	TRUE	Cni-unique core
OG0000440	0	0	0	0	0	0	0	4	11	6	6	6	6	1	6	10	FALSE	Cni-specific
OG0000441	0	0	1	1	1	1	1	5	5	5	4	4	4	3	5	6	TRUE	Cni-unique core
OG0000442	0	1	0	0	0	1	0	9	5	4	5	6	7	7	8	6	FALSE	Cni-unique core
OG0000443	2	2	2	1	2	2	2	4	3	4	4	3	4	4	4	4	TRUE	Shared Core
OG0000444	2	2	2	2	2	2	2	4	4	5	4	4	4	4	4	4	TRUE	Shared Core
OG0000445	1	2	1	4	2	3	2	3	4	3	7	3	6	5	7	5	FALSE	Shared Core
OG0000446	3	2	4	3	2	3	3	4	3	3	3	3	3	3	3	3	TRUE	Shared Core
OG0000447	2	2	2	2	2	2	2	3	2	3	3	3	3	3	3	2	TRUE	Shared Core
OG0000448	1	1	1	1	1	2	2	1	7	5	3	5	7	7	5	2	TRUE	Shared Core
OG0000449	2	2	2	2	2	2	2	3	5	6	4	5	5	7	4	5	FALSE	Shared Core
OG0000450	2	2	2	2	2	2	1	4	4	4	5	3	5	4	4	9	TRUE	Shared Core
OG0000451	2	2	2	2	1	2	2	3	4	4	4	3	5	3	6	6	TRUE	Shared Core
OG0000452	2	3	1	1	1	2	2	3	6	2	3	6	1	2	2	7	TRUE	Shared Core
OG0000453	2	2	2	3	4	3	2	3	8	3	0	3	4	2	2	3	TRUE	Cbr-unique core
OG0000454	2	2	3	3	3	2	3	3	3	3	3	3	3	3	3	3	TRUE	Shared Core
OG0000455	1	2	2	4	6	2	2	2	4	2	8	1	4	1	4	7	TRUE	Shared Core
OG0000456	3	3	3	3	3	3	3	4	4	3	4	4	4	4	3	4	TRUE	Shared Core
OG0000457	0	1	1	1	1	2	1	2	3	1	0	1	1	1	1	2	TRUE	Dispensable
OG0000458	0	0	0	0	0	0	0	3	3	3	5	4	5	3	4	4	TRUE	Cni-specific
OG0000459	0	0	0	0	0	0	0	1	9	7	3	7	5	6	9	11	FALSE	Cni-specific
OG0000460	0	0	0	0	0	0	0	4	5	4	10	4	8	3	16	4	FALSE	Cni-specific
OG0000461	2	2	2	2	2	2	2	4	5	4	3	4	6	5	5	3	TRUE	Shared Core
OG0000462	2	1	1	2	1	2	1	3	3	3	9	4	7	3	5	7	TRUE	Shared Core
OG0000463	1	1	1	2	1	1	2	3	7	8	4	6	5	3	6	6	FALSE	Shared Core
OG0000464	3	3	3	3	3	3	3	4	4	2	4	3	3	4	4	3	TRUE	Shared Core
OG0000465	3	3	3	3	2	3	3	3	3	3	3	3	3	3	3	3	TRUE	Shared Core
OG0000466	1	1	1	1	0	1	1	4	11	4	6	6	3	3	7	7	FALSE	Cni-unique core
OG0000467	3	2	3	3	2	2	2	5	6	4	4	3	4	6	5	3	FALSE	Shared Core
OG0000468	3	3	3	3	3	3	3	3	5	3	3	4	3	3	3	3	TRUE	Shared Core
OG0000469	2	2	2	2	3	2	2	4	5	5	4	5	5	4	5	5	FALSE	Shared Core
OG0000470	4	4	3	3	3	3	3	3	3	3	3	3	3	3	3	5	TRUE	Shared Core
OG0000471	3	3	2	2	2	3	1	5	2	3	3	2	1	3	6	2	TRUE	Shared Core
OG0000472	3	2	2	2	2	2	3	5	5	4	5	5	4	4	4	5	FALSE	Shared Core
OG0000473	3	3	2	3	3	3	3	3	4	3	3	3	4	3	3	3	TRUE	Shared Core
OG0000474	4	3	4	3	3	3	3	3	3	4	4	4	4	3	3	4	TRUE	Shared Core
OG0000475	3	4	2	2	2	6	4	4	7	5	4	0	2	5	3	2	FALSE	Cbr-unique core
OG0000476	0	0	3	1	0	0	1	7	2	10	3	1	5	3	6	9	TRUE	Cni-unique core
OG0000477	0	0	0	0	0	0	0	0	0	0	0	0	0	0	0	0	TRUE	Cni-specific
OG0000478	0	0	0	0	0	0	0	0	0	0	0	0	0	0	0	0	FALSE	Cni-specific
OG0000479	0	0	0	0	0	0	0	7	6	4	4	4	4	10	11	6	FALSE	Cni-specific
OG0000480	0	0	0	0	0	0	0	7	5	5	9	8	3	5	4	11	FALSE	Cni-specific
OG0000481	0	0	0	0	0	0	0	4	0	8	5	6	2	14	4	14	FALSE	Cni-specific
OG0000482	3	4	6	7	5	4	6	3	2	1	3	5	1	3	1	2	FALSE	Shared Core
OG0000483	5	7	8	6	10	8	11	0	0	0	0	0	1	0	0	0	FALSE	Cbr-unique core
OG0000484	3	3	3	3	2	3	3	3	3	3	3	3	3	3	3	3	TRUE	Shared Core
OG0000485	3	3	3	3	3	3	3	3	3	3	2	3	3	3	3	3	TRUE	Shared Core
OG0000486	3	3	3	3	3	3	3	3	4	4	4	3	4	4	4	4	FALSE	Shared Core
OG0000487	3	3	3	3	3	3	3	3	3	3	7	2	3	5	4	2	FALSE	Shared Core
OG0000488	1	1	2	2	2	1	2	4	5	4	7	3	4	6	6	2	FALSE	Shared Core
OG0000489	2	3	3	3	1	2	2	4	6	4	6	4	3	4	3	4	FALSE	Shared Core
OG0000490	2	2	2	2	2	2	2	4	4	4	3	4	3	4	4	4	TRUE	Shared Core
OG0000491	2	2	2	0	2	1	0	2	7	3	2	6	8	1	1	3	TRUE	Cni-unique core
OG0000492	4	4	3	3	3	3	3	3	4	3	3	3	3	3	8	3	FALSE	Shared Core
OG0000493	3	3	4	5	2	3	3	3	3	4	4	4	4	4	4	3	FALSE	Shared Core
OG0000494	3	1	1	3	3	3	3	3	3	3	3	3	3	3	3	3	TRUE	Shared Core
OG0000495	2	2	2	2	2	2	2	4	4	5	3	3	3	4	4	5	TRUE	Shared Core
OG0000496	2	2	2	2	2	2	2	5	5	4	5	4	3	4	4	2	TRUE	Shared Core
OG0000497	2	2	2	2	2	2	2	4	5	4	1	4	5	4	4	7	TRUE	Shared Core
OG0000498	1	2	2	2	2	2	2	3	3	3	3	3	4	3	3	6	TRUE	Shared Core
OG0000499	2	4	4	4	4	3	3	3	3	3	3	4	3	3	4	3	TRUE	Shared Core
OG0000500	3	2	3	2	2	2	3	3	4	3	3	3	3	3	3	3	TRUE	Shared Core
OG0000501	2	2	4	4	2	2	2	2	4	2	3	3	2	3	3	3	TRUE	Shared Core
OG0000502	0	6	7	7	5	6	8	1	3	2	1	3	0	1	4	2	FALSE	Dispensable
OG0000503	4	1	2	2	2	4	0	0	5	5	1	3	2	2	4	18	FALSE	Dispensable
OG0000504	3	2	2	1	2	2	3	4	4	4	3	3	3	3	3	3	TRUE	Shared Core
OG0000505	1	2	8	12	2	1	1	1	2	2	2	4	1	3	3	2	TRUE	Shared Core
OG0000506	2	2	2	2	3	2	2	2	4	2	5	6	8	9	2	2	FALSE	Shared Core
OG0000507	2	2	2	2	2	2	2	5	5	4	4	4	4	3	4	6	TRUE	Shared Core
OG0000508	1	2	2	2	2	1	2	1	6	2	3	2	3	4	3	3	TRUE	Shared Core
OG0000509	1	1	1	1	1	1	1	7	7	7	5	4	4	7	5	2	FALSE	Shared Core
OG0000510	4	4	2	2	2	5	2	4	3	3	4	3	3	3	4	3	TRUE	Shared Core
OG0000511	1	1	0	0	0	1	0	4	5	6	3	4	9	4	3	7	TRUE	Cni-unique core
OG0000512	2	3	3	3	3	3	3	3	3	3	3	3	6	3	3	3	TRUE	Shared Core
OG0000513	2	2	2	2	2	2	2	2	2	2	5	4	5	4	2	6	TRUE	Shared Core
OG0000514	0	0	0	0	0	0	0	7	5	7	7	2	5	3	3	8	FALSE	Cni-specific
OG0000515	0	2	1	1	0	0	1	4	8	5	9	4	3	4	5	8	FALSE	Cni-unique core
OG0000516	1	1	1	1	2	1	1	3	3	3	3	2	2	3	2	1	TRUE	Shared Core
OG0000517	3	2	3	3	2	3	3	3	3	3	3	3	3	3	3	3	TRUE	Shared Core
OG0000518	3	3	3	3	3	3	3	3	3	3	3	3	3	3	3	3	TRUE	Shared Core
OG0000519	1	1	1	1	1	1	1	5	5	5	4	8	5	5	4	6	FALSE	Shared Core
OG0000520	3	3	3	3	3	3	5	2	1	3	0	7	3	5	2	8	FALSE	Cbr-unique core
OG0000521	2	3	3	3	3	2	2	3	3	3	3	3	2	3	3	3	TRUE	Shared Core
OG0000522	2	2	2	2	2	3	3	4	6	3	4	3	3	4	3	7	FALSE	Shared Core
OG0000523	3	3	2	2	2	3	1	4	4	4	4	3	5	5	4	4	FALSE	Shared Core
OG0000524	1	1	1	1	1	1	1	4	5	5	3	6	5	3	4	4	TRUE	Shared Core
OG0000525	1	1	2	2	1	2	1	4	5	5	5	5	4	4	4	6	TRUE	Shared Core
OG0000526	1	1	2	2	2	1	2	4	3	3	2	5	8	2	6	10	FALSE	Shared Core
OG0000527	3	3	3	3	3	3	3	3	5	3	3	3	3	3	3	3	TRUE	Shared Core
OG0000528	2	2	2	2	2	2	2	3	3	3	3	4	3	6	3	6	TRUE	Shared Core
OG0000529	2	3	3	3	2	2	2	2	4	2	4	2	2	3	3	1	TRUE	Shared Core
OG0000530	0	2	7	8	7	2	16	2	1	1	0	4	1	0	1	1	FALSE	Dispensable
OG0000531	0	5	3	4	6	0	6	3	5	13	1	1	0	2	4	1	FALSE	Dispensable
OG0000532	0	0	1	2	2	0	0	2	4	5	6	5	4	7	7	9	FALSE	Cni-unique core
OG0000533	2	2	2	2	2	2	2	3	4	3	3	3	4	3	3	3	TRUE	Shared Core
OG0000534	2	2	3	2	2	2	2	4	3	3	2	4	4	3	4	3	TRUE	Shared Core
OG0000535	3	3	3	3	3	3	3	3	3	3	3	3	3	3	3	3	TRUE	Shared Core
OG0000536	1	1	1	1	1	1	2	3	4	3	4	5	4	5	5	4	TRUE	Shared Core
OG0000537	3	6	4	4	6	6	4	0	2	1	0	2	2	2	0	1	TRUE	Cbr-unique core
OG0000538	2	2	3	3	2	2	3	4	4	4	4	4	4	4	4	4	FALSE	Shared Core
OG0000539	1	3	3	3	4	1	0	2	5	2	2	1	2	3	3	2	TRUE	Cni-unique core
OG0000540	5	5	1	1	1	3	1	4	4	4	3	3	4	4	2	4	TRUE	Shared Core
OG0000541	2	2	1	2	2	2	2	6	4	5	3	5	5	4	3	5	FALSE	Shared Core
OG0000542	2	2	1	2	0	2	2	4	5	7	3	10	2	2	4	5	FALSE	Cni-unique core
OG0000543	1	1	0	0	0	1	1	10	6	4	6	5	4	7	2	5	FALSE	Cni-unique core
OG0000544	1	2	2	2	2	2	2	3	6	3	4	4	4	4	3	5	TRUE	Shared Core
OG0000545	3	3	3	2	2	2	2	1	6	3	3	2	3	3	3	5	TRUE	Shared Core
OG0000546	3	1	2	2	1	3	5	2	5	2	2	3	1	2	1	8	TRUE	Shared Core
OG0000547	0	2	1	2	2	0	2	3	5	4	3	4	7	6	6	4	TRUE	Cni-unique core
OG0000548	0	0	0	0	1	0	0	4	2	5	7	3	8	4	9	10	FALSE	Cni-unique core
OG0000549	3	3	3	3	4	3	3	3	3	3	3	2	3	3	3	2	TRUE	Shared Core
OG0000550	3	2	2	2	2	3	2	5	4	5	4	4	3	3	5	3	FALSE	Shared Core
OG0000551	2	2	2	2	2	2	2	3	4	2	4	3	8	5	6	2	FALSE	Shared Core
OG0000552	1	1	1	1	1	1	1	4	6	4	5	6	4	3	4	3	TRUE	Shared Core
OG0000553	3	3	3	3	3	3	1	3	3	4	4	3	3	3	4	6	FALSE	Shared Core
OG0000554	3	2	2	2	3	2	2	3	3	3	3	3	3	3	2	2	TRUE	Shared Core
OG0000555	3	3	3	3	3	3	2	3	4	3	3	2	3	3	3	3	TRUE	Shared Core
OG0000556	3	3	2	2	2	3	2	4	4	3	3	4	3	3	5	3	FALSE	Shared Core
OG0000557	3	2	1	2	3	2	2	3	6	3	3	2	4	3	3	5	TRUE	Shared Core
OG0000558	2	1	3	2	2	1	2	4	4	6	5	3	4	5	2	4	FALSE	Shared Core
OG0000559	0	0	0	0	0	0	0	1	6	5	3	1	1	7	4	5	TRUE	Cni-specific
OG0000560	0	0	0	0	0	0	0	0	0	0	0	0	0	0	0	0	TRUE	Cni-specific
OG0000561	0	0	0	0	0	0	0	5	6	9	6	5	5	3	6	6	FALSE	Cni-specific
OG0000562	0	0	0	0	0	0	0	6	3	7	6	5	4	7	5	4	TRUE	Cni-specific
OG0000563	0	0	0	0	0	0	0	8	3	4	8	4	4	6	6	7	TRUE	Cni-specific
OG0000564	0	0	1	1	2	0	1	4	4	6	8	6	4	5	8	2	FALSE	Cni-unique core
OG0000565	1	1	1	1	1	1	1	4	7	4	4	4	5	4	4	4	TRUE	Shared Core
OG0000566	2	2	2	2	2	2	2	4	4	4	4	5	4	3	4	2	TRUE	Shared Core
OG0000567	1	1	2	2	2	1	2	2	2	4	2	6	6	2	2	7	TRUE	Shared Core
OG0000568	5	4	8	7	6	4	9	1	1	1	1	1	0	1	1	1	FALSE	Cbr-unique core
OG0000569	2	2	2	2	3	2	2	3	4	3	2	5	3	3	1	9	FALSE	Shared Core
OG0000570	2	2	2	2	2	2	1	2	3	2	6	6	7	8	2	2	FALSE	Shared Core
OG0000571	3	3	3	3	3	2	2	4	3	3	4	3	3	4	3	2	TRUE	Shared Core
OG0000572	2	2	3	3	2	2	2	4	4	4	4	4	3	3	5	4	FALSE	Shared Core
OG0000573	2	2	2	2	2	2	3	3	2	3	3	3	3	3	3	3	TRUE	Shared Core
OG0000574	1	1	2	2	2	1	2	5	3	5	5	3	6	3	2	8	FALSE	Shared Core
OG0000575	2	2	2	2	2	2	2	4	4	4	4	4	4	4	4	4	FALSE	Shared Core
OG0000576	2	3	3	3	3	2	3	3	6	4	3	1	2	2	3	3	TRUE	Shared Core
OG0000577	3	3	2	2	2	3	2	3	3	6	2	2	3	3	3	6	TRUE	Shared Core
OG0000578	2	2	1	1	1	2	2	3	5	3	7	4	4	3	2	6	FALSE	Shared Core
OG0000579	3	3	0	4	4	3	3	2	4	2	7	2	2	2	2	4	TRUE	Cni-unique core
OG0000580	2	2	2	2	4	3	2	2	5	2	4	3	3	3	3	7	TRUE	Shared Core
OG0000581	3	3	3	3	3	3	3	3	2	3	3	3	3	3	3	4	TRUE	Shared Core
OG0000582	3	3	1	1	1	2	1	5	4	4	2	6	2	5	2	4	TRUE	Shared Core
OG0000583	2	2	3	4	3	2	3	3	3	3	3	3	3	3	3	3	TRUE	Shared Core
OG0000584	2	3	3	3	2	2	2	4	3	4	3	3	3	4	4	3	TRUE	Shared Core
OG0000585	3	3	3	3	3	3	2	3	3	3	3	3	3	3	3	3	TRUE	Shared Core
OG0000586	0	0	0	0	0	0	0	5	5	5	5	4	4	5	5	4	FALSE	Cni-specific
OG0000587	0	2	2	2	3	3	2	1	2	3	4	2	5	3	4	2	TRUE	Cni-unique core
OG0000588	0	2	2	3	2	2	2	4	3	3	10	3	1	5	3	5	FALSE	Cni-unique core
OG0000589	3	3	3	3	4	3	3	3	4	2	3	2	3	2	3	2	TRUE	Shared Core
OG0000590	1	1	1	1	1	1	1	5	6	5	4	4	4	5	5	4	FALSE	Shared Core
OG0000591	3	2	3	2	2	2	2	3	4	2	3	3	3	2	2	3	TRUE	Shared Core
OG0000592	1	1	2	2	1	1	2	3	3	3	2	4	3	3	3	3	TRUE	Shared Core
OG0000593	2	3	3	3	2	3	1	2	3	3	4	4	3	3	3	4	TRUE	Shared Core
OG0000594	3	3	3	3	3	3	2	3	3	3	3	3	3	3	3	3	TRUE	Shared Core
OG0000595	2	2	3	3	2	3	3	2	3	3	2	7	2	3	3	4	TRUE	Shared Core
OG0000596	3	2	2	2	2	2	2	3	3	3	3	3	3	3	4	4	TRUE	Shared Core
OG0000597	2	2	2	2	2	2	2	2	3	3	3	3	4	3	3	3	TRUE	Shared Core
OG0000598	2	2	2	2	2	2	2	3	3	3	3	3	3	3	3	3	TRUE	Shared Core
OG0000599	3	3	2	2	3	3	2	3	3	3	4	3	3	2	5	3	FALSE	Shared Core
OG0000600	2	2	2	2	2	2	2	4	4	3	3	4	4	3	4	5	FALSE	Shared Core
OG0000601	1	1	1	1	1	1	1	1	5	3	4	2	3	3	5	4	TRUE	Shared Core
OG0000602	2	2	2	3	3	2	1	2	3	5	5	2	3	4	5	3	TRUE	Shared Core
OG0000603	1	1	1	1	1	1	1	4	3	3	6	4	4	6	4	5	TRUE	Shared Core
OG0000604	2	4	3	3	3	4	3	2	2	2	2	1	2	2	1	4	TRUE	Shared Core
OG0000605	2	4	2	2	2	4	1	3	4	3	5	4	3	4	2	5	FALSE	Shared Core
OG0000606	0	1	1	1	0	1	1	5	4	4	5	9	2	5	3	8	FALSE	Cni-unique core
OG0000607	1	1	1	0	0	1	0	8	2	2	11	3	5	3	2	5	FALSE	Cni-unique core
OG0000608	1	1	1	1	1	1	1	4	4	4	4	5	4	4	4	4	TRUE	Shared Core
OG0000609	2	2	2	2	2	2	2	2	4	2	4	2	2	2	2	2	TRUE	Shared Core
OG0000610	2	2	6	6	5	2	3	3	2	3	3	2	2	2	2	3	FALSE	Shared Core
OG0000611	1	1	1	1	1	1	1	5	7	3	5	5	3	6	4	4	FALSE	Shared Core
OG0000612	4	2	3	3	2	4	1	4	3	2	4	2	4	3	4	4	FALSE	Shared Core
OG0000613	1	1	1	1	1	1	1	7	2	6	2	1	5	7	6	2	TRUE	Shared Core
OG0000614	3	2	2	2	2	1	3	3	3	3	3	3	3	3	3	3	TRUE	Shared Core
OG0000615	2	2	2	2	2	2	2	2	4	3	5	4	3	2	2	5	TRUE	Shared Core
OG0000616	1	1	1	1	1	1	1	5	5	5	3	3	6	5	5	5	FALSE	Shared Core
OG0000617	3	3	2	2	3	2	3	3	3	2	3	3	3	2	2	5	TRUE	Shared Core
OG0000618	4	4	3	3	2	4	2	2	3	2	3	2	2	3	4	5	FALSE	Shared Core
OG0000619	2	2	2	2	2	2	2	4	5	4	3	4	4	4	4	3	FALSE	Shared Core
OG0000620	2	3	2	2	2	2	2	2	2	3	2	3	3	3	3	3	TRUE	Shared Core
OG0000621	3	4	3	3	3	2	3	2	4	2	2	2	2	2	2	2	TRUE	Shared Core
OG0000622	3	2	2	2	2	2	2	2	2	2	2	3	2	2	2	2	TRUE	Shared Core
OG0000623	3	3	2	3	3	3	3	3	3	3	3	2	3	3	3	3	TRUE	Shared Core
OG0000624	1	2	2	1	1	2	2	2	3	3	6	2	5	3	5	7	TRUE	Shared Core
OG0000625	1	2	6	2	2	2	2	2	3	3	3	3	3	3	3	3	TRUE	Shared Core
OG0000626	2	2	2	2	3	2	2	2	3	1	2	1	1	2	2	4	TRUE	Shared Core
OG0000627	2	2	3	3	2	2	2	3	3	2	2	3	2	2	2	4	TRUE	Shared Core
OG0000628	2	2	2	2	2	2	2	2	2	2	2	2	2	2	2	4	TRUE	Shared Core
OG0000629	2	2	2	2	2	2	2	2	3	2	3	2	2	2	2	2	TRUE	Shared Core
OG0000630	0	7	8	11	3	9	8	1	0	0	2	0	0	0	0	0	FALSE	Dispensable
OG0000631	0	0	0	0	0	0	0	9	5	4	6	5	5	6	4	5	FALSE	Cni-specific
OG0000632	0	0	0	0	0	0	0	4	7	5	6	10	2	9	5	1	FALSE	Cni-specific
OG0000633	0	0	0	2	2	0	2	5	6	4	5	5	4	4	5	5	FALSE	Cni-unique core
OG0000634	2	2	3	3	3	2	3	3	3	3	3	4	3	3	3	2	TRUE	Shared Core
OG0000635	1	1	2	1	1	2	2	5	6	2	4	4	2	6	4	4	FALSE	Shared Core
OG0000636	3	3	3	3	3	3	3	2	2	2	2	2	2	2	2	2	TRUE	Shared Core
OG0000637	2	2	2	2	2	2	2	2	2	2	2	2	2	2	3	2	TRUE	Shared Core
OG0000638	2	4	3	4	5	4	7	3	0	0	3	3	0	1	3	1	TRUE	Cbr-unique core
OG0000639	3	2	2	2	2	2	2	3	3	3	2	4	4	3	4	4	TRUE	Shared Core
OG0000640	4	5	2	3	1	4	4	3	4	3	3	4	2	1	3	2	FALSE	Shared Core
OG0000641	2	2	2	2	2	2	2	3	3	3	3	3	3	3	4	3	TRUE	Shared Core
OG0000642	2	2	3	2	2	2	1	3	3	3	3	3	3	3	3	3	TRUE	Shared Core
OG0000643	1	1	1	1	2	1	2	2	9	2	8	5	6	1	2	4	FALSE	Shared Core
OG0000644	2	2	2	2	2	2	2	2	2	2	2	1	2	3	2	3	TRUE	Shared Core
OG0000645	1	2	2	3	2	2	3	3	4	3	3	3	3	3	3	2	TRUE	Shared Core
OG0000646	1	0	1	1	0	2	3	12	1	3	3	8	1	2	2	6	FALSE	Cni-unique core
OG0000647	3	3	2	2	2	3	2	3	4	3	3	3	2	3	3	2	TRUE	Shared Core
OG0000648	1	0	1	1	1	1	1	4	3	3	7	5	3	4	4	6	TRUE	Cni-unique core
OG0000649	1	1	1	1	1	1	1	2	2	2	2	2	2	2	2	2	TRUE	Shared Core
OG0000650	0	0	1	0	1	2	2	2	2	2	2	3	2	2	2	2	TRUE	Cni-unique core
OG0000651	0	0	0	0	0	0	0	3	9	4	3	11	6	3	1	5	FALSE	Cni-specific
OG0000652	0	0	0	0	0	0	0	3	3	3	8	5	6	3	2	2	TRUE	Cni-specific
OG0000653	0	1	2	2	2	1	2	5	2	3	4	4	2	3	3	4	TRUE	Cni-unique core
OG0000654	0	0	0	0	0	0	0	4	5	4	3	8	8	5	5	5	FALSE	Cni-specific
OG0000655	0	0	0	0	0	0	0	0	0	0	0	0	0	0	0	0	FALSE	Cni-specific
OG0000656	0	0	0	0	0	0	0	0	0	0	0	0	0	0	0	0	FALSE	Cni-specific
OG0000657	0	0	0	0	0	0	0	6	5	6	6	2	4	6	7	6	FALSE	Cni-specific
OG0000658	2	2	2	2	2	2	2	3	4	3	3	3	2	1	3	2	TRUE	Shared Core
OG0000659	2	2	2	2	2	2	2	2	2	2	2	2	2	2	2	2	TRUE	Shared Core
OG0000660	2	2	2	2	2	2	2	4	3	4	3	2	2	3	3	3	TRUE	Shared Core
OG0000661	1	1	1	1	1	1	1	5	4	5	2	5	3	4	2	4	TRUE	Shared Core
OG0000662	1	4	3	2	3	2	2	3	3	3	3	3	4	3	3	2	TRUE	Shared Core
OG0000663	2	2	3	2	3	3	3	2	3	2	3	2	3	2	3	3	TRUE	Shared Core
OG0000664	1	1	1	1	1	1	1	3	7	5	2	5	2	3	5	4	FALSE	Shared Core
OG0000665	3	1	2	1	1	1	1	4	3	4	4	3	4	4	4	3	TRUE	Shared Core
OG0000666	3	1	2	3	2	3	1	3	3	4	3	4	3	2	4	3	TRUE	Shared Core
OG0000667	2	2	2	2	2	2	2	4	4	4	3	2	3	3	3	4	TRUE	Shared Core
OG0000668	1	0	1	1	1	0	1	5	5	5	5	2	1	5	2	6	TRUE	Cni-unique core
OG0000669	3	3	2	2	3	5	2	3	3	3	2	4	2	2	3	3	TRUE	Shared Core
OG0000670	2	2	2	2	2	2	2	5	3	3	3	2	3	2	3	2	TRUE	Shared Core
OG0000671	1	1	1	1	1	1	1	6	13	4	4	3	4	1	1	4	FALSE	Shared Core
OG0000672	1	1	1	1	1	1	1	4	8	4	5	5	2	4	8	0	FALSE	Cbr-unique core
OG0000673	3	3	1	2	3	2	3	3	4	3	3	4	4	3	2	4	FALSE	Shared Core
OG0000674	1	1	1	1	1	1	1	3	6	5	4	5	3	4	3	4	TRUE	Shared Core
OG0000675	1	1	4	2	3	1	3	3	5	5	3	4	3	3	2	4	FALSE	Shared Core
OG0000676	1	1	3	2	2	1	2	3	3	3	3	3	3	3	3	3	TRUE	Shared Core
OG0000677	3	2	3	3	3	2	2	3	3	3	3	3	3	3	2	3	TRUE	Shared Core
OG0000678	1	2	3	2	2	1	3	1	5	3	3	6	3	2	2	4	TRUE	Shared Core
OG0000679	2	2	2	2	2	2	2	2	3	2	2	2	2	2	2	3	TRUE	Shared Core
OG0000680	2	2	2	2	2	2	2	3	3	3	3	3	3	3	3	3	TRUE	Shared Core
OG0000681	2	2	2	2	2	2	2	2	4	2	2	2	3	2	2	3	TRUE	Shared Core
OG0000682	2	1	1	1	1	1	1	3	5	3	5	3	3	4	3	3	TRUE	Shared Core
OG0000683	1	2	2	2	2	2	2	3	6	3	3	3	3	2	3	4	TRUE	Shared Core
OG0000684	1	1	2	2	2	2	1	3	6	6	3	2	3	3	3	3	TRUE	Shared Core
OG0000685	0	0	0	0	0	0	0	0	0	0	0	0	0	0	0	0	TRUE	Cni-specific
OG0000686	0	0	0	0	0	0	0	0	0	0	0	0	0	0	0	0	TRUE	Cni-specific
OG0000687	0	0	0	0	1	0	0	6	6	7	1	5	5	4	6	6	FALSE	Cni-unique core
OG0000688	2	2	2	2	2	2	2	2	4	4	3	3	2	3	3	4	TRUE	Shared Core
OG0000689	6	7	5	4	8	5	11	0	0	0	0	0	0	0	0	0	FALSE	Cbr-specific
OG0000690	1	1	1	1	1	1	1	2	4	2	2	3	2	3	3	3	TRUE	Shared Core
OG0000691	2	3	2	2	3	2	1	3	3	3	3	3	2	3	3	3	TRUE	Shared Core
OG0000692	3	4	4	4	4	3	3	2	2	2	2	2	2	2	2	1	TRUE	Shared Core
OG0000693	2	1	2	2	1	1	2	3	2	3	3	3	3	3	3	3	TRUE	Shared Core
OG0000694	2	3	3	3	3	2	3	2	1	2	1	2	1	2	3	2	TRUE	Shared Core
OG0000695	2	2	2	2	2	2	2	2	2	3	2	2	2	3	2	2	TRUE	Shared Core
OG0000696	2	2	2	2	2	1	1	4	3	4	5	1	2	5	4	4	FALSE	Shared Core
OG0000697	2	2	2	2	2	2	2	2	3	2	2	3	7	3	3	2	FALSE	Shared Core
OG0000698	3	3	4	4	3	3	3	2	2	2	2	2	2	2	2	2	TRUE	Shared Core
OG0000699	2	2	2	2	2	2	2	2	4	2	2	4	3	4	2	3	TRUE	Shared Core
OG0000700	1	1	1	1	3	1	1	4	4	3	5	5	3	4	6	3	FALSE	Shared Core
OG0000701	1	1	2	2	2	1	2	6	3	5	3	5	3	5	2	3	FALSE	Shared Core
OG0000702	1	1	1	1	0	1	0	2	4	2	3	3	2	6	2	5	TRUE	Cni-unique core
OG0000703	1	2	1	1	2	2	1	1	6	2	9	2	3	0	3	10	FALSE	Cbr-unique core
OG0000704	2	2	3	3	3	2	3	2	3	2	2	7	2	1	2	2	TRUE	Shared Core
OG0000705	1	1	1	1	0	1	1	2	3	3	6	2	3	3	5	3	TRUE	Cni-unique core
OG0000706	2	4	2	2	2	3	4	2	4	2	2	2	3	2	2	1	TRUE	Shared Core
OG0000707	0	2	1	1	0	2	1	2	7	2	6	3	3	4	2	3	TRUE	Cni-unique core
OG0000708	2	1	2	2	2	1	2	3	3	3	3	3	3	2	3	3	TRUE	Shared Core
OG0000709	2	2	2	2	2	1	2	3	4	3	3	3	3	4	3	4	FALSE	Shared Core
OG0000710	2	2	2	2	2	2	2	2	3	2	2	2	2	2	2	2	TRUE	Shared Core
OG0000711	2	2	2	2	2	2	2	4	3	4	3	6	3	3	2	3	FALSE	Shared Core
OG0000712	2	1	1	1	1	1	2	3	3	3	3	3	3	3	3	3	TRUE	Shared Core
OG0000713	2	1	2	2	1	1	2	3	3	3	3	3	3	2	3	3	TRUE	Shared Core
OG0000714	2	3	3	2	2	3	2	2	2	2	2	4	3	2	2	2	TRUE	Shared Core
OG0000715	1	1	1	2	1	1	1	4	6	5	3	4	2	4	3	3	TRUE	Shared Core
OG0000716	2	1	2	1	1	3	2	2	4	4	7	6	2	4	2	2	FALSE	Shared Core
OG0000717	2	2	2	2	2	2	2	5	2	4	5	3	1	3	2	3	FALSE	Shared Core
OG0000718	1	1	1	1	1	1	1	2	4	2	4	5	5	4	3	3	TRUE	Shared Core
OG0000719	2	2	2	2	2	2	2	2	2	2	1	2	2	1	2	2	TRUE	Shared Core
OG0000720	2	2	2	2	2	2	2	4	2	2	5	4	2	2	2	3	FALSE	Shared Core
OG0000721	2	2	2	2	2	2	3	2	2	5	3	2	2	4	1	4	TRUE	Shared Core
OG0000722	2	2	2	2	3	2	2	3	3	3	3	3	3	3	4	4	FALSE	Shared Core
OG0000723	1	1	0	0	0	1	1	3	6	4	6	1	4	1	3	8	TRUE	Cni-unique core
OG0000724	2	2	2	2	2	2	2	3	4	2	4	2	2	3	3	3	TRUE	Shared Core
OG0000725	2	2	2	2	2	2	2	3	3	3	3	3	3	3	4	4	TRUE	Shared Core
OG0000726	2	2	2	2	2	2	2	3	3	2	3	2	3	3	3	3	TRUE	Shared Core
OG0000727	2	2	2	2	2	2	2	2	2	2	2	2	2	2	2	2	TRUE	Shared Core
OG0000728	1	3	1	2	1	3	1	3	3	3	3	5	3	3	5	4	FALSE	Shared Core
OG0000729	2	3	2	2	2	1	2	1	2	2	2	2	2	1	2	3	TRUE	Shared Core
OG0000730	1	1	5	7	6	5	4	2	0	2	1	1	2	4	1	3	FALSE	Cbr-unique core
OG0000731	2	2	1	2	2	2	2	2	3	2	3	2	3	2	2	3	TRUE	Shared Core
OG0000732	2	2	2	2	2	2	2	2	2	2	2	2	3	2	2	2	TRUE	Shared Core
OG0000733	2	2	2	2	2	2	2	2	4	2	1	2	6	3	3	6	FALSE	Shared Core
OG0000734	1	2	2	2	2	1	1	2	6	2	10	2	0	1	4	7	FALSE	Cbr-unique core
OG0000735	3	3	4	3	3	3	3	3	2	2	2	3	3	2	3	3	FALSE	Shared Core
OG0000736	1	1	1	1	1	1	1	1	2	1	1	1	1	1	1	1	TRUE	Shared Core
OG0000737	2	2	3	3	2	3	2	2	3	3	1	3	3	2	2	2	TRUE	Shared Core
OG0000738	1	3	3	2	3	1	3	2	2	2	2	2	1	2	2	2	TRUE	Shared Core
OG0000739	2	1	0	1	2	1	2	2	8	2	2	4	2	2	2	6	TRUE	Cni-unique core
OG0000740	2	2	2	2	2	2	2	3	3	2	3	3	1	2	3	3	TRUE	Shared Core
OG0000741	0	0	0	1	0	0	0	5	3	7	6	2	5	2	4	5	FALSE	Cni-unique core
OG0000742	0	0	0	0	0	0	0	0	0	0	0	0	0	0	0	0	TRUE	Cni-specific
OG0000743	0	0	2	1	2	0	2	3	7	7	4	4	3	2	3	2	FALSE	Cni-unique core
OG0000744	7	6	5	5	4	6	5	0	0	0	0	0	0	1	0	2	TRUE	Cbr-unique core
OG0000745	2	2	2	2	2	2	2	3	4	3	3	3	3	3	3	3	TRUE	Shared Core
OG0000746	2	2	2	2	2	2	2	1	3	2	2	2	3	2	2	3	TRUE	Shared Core
OG0000747	1	1	1	1	1	1	1	4	3	3	4	4	4	4	3	4	TRUE	Shared Core
OG0000748	2	2	2	2	2	2	2	3	2	2	3	2	2	3	3	2	TRUE	Shared Core
OG0000749	2	2	2	2	2	2	2	2	2	2	2	2	2	2	2	2	TRUE	Shared Core
OG0000750	2	2	3	3	3	2	2	3	2	3	2	2	2	3	4	4	FALSE	Shared Core
OG0000751	2	2	2	2	2	2	2	2	3	2	3	7	2	2	2	4	TRUE	Shared Core
OG0000752	1	1	1	1	0	1	1	4	3	4	3	5	5	4	4	4	TRUE	Cni-unique core
OG0000753	2	2	2	2	2	2	2	2	2	2	4	2	2	4	3	2	TRUE	Shared Core
OG0000754	1	1	3	3	1	1	2	2	3	2	2	3	2	2	1	1	TRUE	Shared Core
OG0000755	1	1	1	1	1	1	1	1	5	3	6	2	2	5	8	2	TRUE	Shared Core
OG0000756	2	2	2	3	2	2	1	1	5	4	3	3	4	2	2	4	TRUE	Shared Core
OG0000757	2	4	2	0	5	2	2	2	4	3	3	3	3	3	2	3	FALSE	Cni-unique core
OG0000758	2	1	2	1	2	1	2	3	3	3	3	3	3	3	4	3	TRUE	Shared Core
OG0000759	2	2	2	2	2	2	2	3	3	2	2	4	2	2	2	2	TRUE	Shared Core
OG0000760	2	2	3	2	3	3	2	5	3	5	2	2	3	2	2	3	FALSE	Shared Core
OG0000761	2	2	1	2	2	2	2	3	3	3	2	3	3	4	4	3	FALSE	Shared Core
OG0000762	2	3	3	3	3	3	3	2	3	3	3	2	2	0	3	3	TRUE	Cbr-unique core
OG0000763	1	1	2	2	2	1	2	3	3	3	3	3	3	3	3	3	TRUE	Shared Core
OG0000764	1	1	1	1	1	1	1	4	4	4	6	3	3	3	3	4	TRUE	Shared Core
OG0000765	2	3	3	3	3	2	3	2	3	2	4	3	2	2	2	4	FALSE	Shared Core
OG0000766	1	1	1	0	1	1	1	2	3	1	4	2	2	1	2	2	TRUE	Cni-unique core
OG0000767	3	2	2	2	2	3	3	2	2	2	2	2	2	2	2	2	TRUE	Shared Core
OG0000768	2	2	2	2	2	2	2	3	3	3	2	3	3	3	3	1	TRUE	Shared Core
OG0000769	2	2	2	2	2	2	2	3	3	3	3	3	3	3	3	3	TRUE	Shared Core
OG0000770	1	1	2	2	2	1	2	3	4	3	3	3	3	3	3	6	TRUE	Shared Core
OG0000771	2	2	2	2	2	2	2	2	3	2	4	2	2	3	2	4	TRUE	Shared Core
OG0000772	2	2	2	2	2	2	2	2	3	3	1	1	2	1	2	3	TRUE	Shared Core
OG0000773	2	3	3	3	3	3	3	2	6	3	0	4	2	2	2	2	FALSE	Cbr-unique core
OG0000774	1	3	2	1	1	1	1	3	3	2	4	5	5	4	4	4	FALSE	Shared Core
OG0000775	1	2	1	1	1	1	1	3	4	2	4	4	4	2	4	5	TRUE	Shared Core
OG0000776	3	2	2	2	2	3	3	2	2	2	2	2	3	2	2	2	TRUE	Shared Core
OG0000777	0	0	0	0	0	0	0	0	0	0	0	0	0	0	0	0	TRUE	Cni-specific
OG0000778	0	2	2	3	3	2	3	2	4	2	4	2	1	2	3	4	TRUE	Cni-unique core
OG0000779	0	0	0	0	0	0	0	5	3	5	4	5	5	6	5	4	TRUE	Cni-specific
OG0000780	0	1	2	2	2	1	1	3	2	4	3	10	2	3	4	4	FALSE	Cni-unique core
OG0000781	0	0	0	1	0	0	0	3	3	4	7	8	3	5	6	4	FALSE	Cni-unique core
OG0000782	0	0	0	0	0	0	0	5	10	4	4	3	5	6	5	2	FALSE	Cni-specific
OG0000783	2	2	3	3	2	2	2	2	4	2	2	3	2	3	2	2	TRUE	Shared Core
OG0000784	2	2	2	2	2	2	2	2	2	2	2	2	2	2	2	2	TRUE	Shared Core
OG0000785	5	10	2	2	0	14	1	0	2	0	0	3	1	0	3	0	FALSE	Dispensable
OG0000786	2	2	2	2	2	2	2	2	2	2	2	2	2	2	3	2	TRUE	Shared Core
OG0000787	1	1	1	1	1	1	1	5	2	4	4	3	3	3	4	5	TRUE	Shared Core
OG0000788	2	1	2	2	2	1	2	3	3	3	3	3	3	3	3	3	TRUE	Shared Core
OG0000789	4	3	6	8	4	3	5	0	0	0	1	0	1	1	1	0	TRUE	Cbr-unique core
OG0000790	2	2	2	2	2	2	2	3	2	3	4	3	1	4	2	3	TRUE	Shared Core
OG0000791	2	2	1	1	1	2	2	2	3	4	3	2	3	4	4	4	TRUE	Shared Core
OG0000792	1	1	1	2	2	1	2	5	4	3	5	3	3	5	2	3	FALSE	Shared Core
OG0000793	1	1	1	1	1	1	1	4	4	3	6	3	6	2	3	4	FALSE	Shared Core
OG0000794	1	1	2	2	2	1	2	3	2	2	3	3	3	3	3	3	TRUE	Shared Core
OG0000795	1	1	1	1	1	1	1	4	4	4	5	3	4	4	4	4	FALSE	Shared Core
OG0000796	1	1	1	1	1	1	1	3	6	3	2	2	3	3	4	7	TRUE	Shared Core
OG0000797	2	2	2	2	2	2	2	2	2	2	1	2	2	3	1	2	TRUE	Shared Core
OG0000798	2	4	2	2	2	4	2	2	3	2	2	2	2	2	2	4	TRUE	Shared Core
OG0000799	2	2	2	2	2	2	2	3	2	3	3	3	3	3	3	3	TRUE	Shared Core
OG0000800	2	3	4	3	3	3	3	2	3	2	3	2	2	2	2	4	FALSE	Shared Core
OG0000801	2	2	1	1	2	2	2	2	4	3	2	2	3	2	2	5	TRUE	Shared Core
OG0000802	2	2	1	2	2	2	2	3	2	2	1	3	2	3	2	3	TRUE	Shared Core
OG0000803	2	4	2	2	2	2	2	2	3	2	2	2	2	2	2	2	TRUE	Shared Core
OG0000804	1	1	1	1	1	2	1	3	6	4	2	1	3	2	4	4	TRUE	Shared Core
OG0000805	3	3	2	2	2	3	2	3	3	3	3	2	3	3	2	4	FALSE	Shared Core
OG0000806	1	4	2	2	2	4	2	2	2	2	2	1	2	2	2	3	TRUE	Shared Core
OG0000807	0	0	0	0	0	0	0	5	1	5	1	3	4	3	5	9	TRUE	Cni-specific
OG0000808	0	0	0	0	0	0	0	5	8	4	3	2	5	2	3	8	FALSE	Cni-specific
OG0000809	0	0	0	0	0	0	0	2	3	2	6	4	8	1	3	10	TRUE	Cni-specific
OG0000810	0	0	1	1	1	1	1	4	7	5	2	2	5	5	3	4	FALSE	Cni-unique core
OG0000811	0	1	0	1	2	1	3	7	4	5	3	3	5	1	3	4	FALSE	Cni-unique core
OG0000812	0	0	0	0	0	0	0	10	1	6	6	5	0	2	8	5	FALSE	Cni-specific
OG0000813	1	1	1	1	2	1	1	3	6	3	2	3	3	1	3	6	TRUE	Shared Core
OG0000814	2	2	2	2	2	2	2	2	2	2	2	2	2	2	2	2	TRUE	Shared Core
OG0000815	1	1	2	1	1	1	2	5	3	4	3	3	3	2	3	3	TRUE	Shared Core
OG0000816	5	12	3	3	4	3	7	1	0	0	1	2	0	0	1	0	FALSE	Cbr-unique core
OG0000817	3	1	1	1	1	2	2	4	3	3	3	3	6	3	3	3	FALSE	Shared Core
OG0000818	1	2	2	3	2	1	2	4	2	4	4	4	4	2	3	2	FALSE	Shared Core
OG0000819	2	2	1	1	1	1	2	4	2	4	3	5	3	2	3	2	TRUE	Shared Core
OG0000820	2	2	2	2	2	2	2	2	3	2	2	3	2	2	3	2	TRUE	Shared Core
OG0000821	2	3	3	3	3	2	2	2	2	2	2	4	2	2	2	2	TRUE	Shared Core
OG0000822	2	2	2	2	2	2	2	3	3	3	3	3	4	3	3	3	FALSE	Shared Core
OG0000823	1	1	2	2	2	1	2	3	3	3	3	3	3	3	3	3	TRUE	Shared Core
OG0000824	3	3	2	2	2	3	2	2	2	2	2	2	2	2	2	2	TRUE	Shared Core
OG0000825	2	2	2	2	2	2	2	4	3	3	3	3	3	3	3	3	FALSE	Shared Core
OG0000826	2	2	2	2	2	2	2	2	2	2	2	2	2	2	2	2	TRUE	Shared Core
OG0000827	1	1	1	1	1	1	2	4	3	4	3	3	3	3	3	4	TRUE	Shared Core
OG0000828	2	2	2	2	2	2	2	2	2	2	2	2	2	2	2	4	TRUE	Shared Core
OG0000829	2	2	2	2	2	2	2	2	2	2	2	2	2	2	2	3	TRUE	Shared Core
OG0000830	1	1	1	2	1	1	1	6	4	5	1	1	2	1	7	5	FALSE	Shared Core
OG0000831	2	2	2	1	2	2	2	2	4	2	2	2	2	2	2	4	TRUE	Shared Core
OG0000832	2	2	2	2	4	2	2	2	4	2	2	2	2	2	2	3	TRUE	Shared Core
OG0000833	2	3	2	1	2	2	2	2	3	2	2	2	1	2	2	3	TRUE	Shared Core
OG0000834	2	2	2	2	2	2	2	2	3	2	2	2	2	2	2	4	TRUE	Shared Core
OG0000835	2	2	2	2	2	2	2	2	2	2	2	3	3	3	3	2	TRUE	Shared Core
OG0000836	1	2	2	2	1	2	2	3	3	3	3	3	3	4	2	4	TRUE	Shared Core
OG0000837	2	2	2	2	2	2	2	2	2	2	2	2	2	2	2	2	TRUE	Shared Core
OG0000838	1	1	1	1	1	1	1	3	4	3	3	3	3	3	3	4	TRUE	Shared Core
OG0000839	1	2	1	1	2	1	1	3	7	3	3	4	4	3	2	3	FALSE	Shared Core
OG0000840	2	2	2	2	4	2	2	2	4	2	2	2	2	2	3	2	TRUE	Shared Core
OG0000841	0	0	0	0	0	0	0	0	0	0	0	0	0	0	0	0	FALSE	Cni-specific
OG0000842	0	0	0	0	0	0	0	3	3	2	6	5	3	3	3	7	TRUE	Cni-specific
OG0000843	0	0	0	0	0	0	0	3	4	3	5	3	3	3	3	4	TRUE	Cni-specific
OG0000844	0	0	0	0	0	0	0	3	9	5	3	3	3	3	3	4	TRUE	Cni-specific
OG0000845	0	0	0	0	0	0	0	5	6	6	8	4	2	4	4	3	FALSE	Cni-specific
OG0000846	2	2	2	2	2	2	2	2	3	2	2	2	2	2	2	2	TRUE	Shared Core
OG0000847	2	2	2	2	2	2	2	2	3	2	2	2	2	2	2	2	TRUE	Shared Core
OG0000848	2	1	3	2	2	2	2	1	3	1	2	2	3	2	0	1	TRUE	Cbr-unique core
OG0000849	2	2	2	2	2	2	2	2	2	2	2	2	2	2	2	2	TRUE	Shared Core
OG0000850	2	2	2	2	2	2	2	2	2	2	2	2	2	2	2	2	TRUE	Shared Core
OG0000851	3	3	2	2	2	3	2	3	2	2	3	3	2	3	2	2	FALSE	Shared Core
OG0000852	2	2	2	2	2	2	2	2	2	2	2	2	2	2	3	4	TRUE	Shared Core
OG0000853	2	2	1	1	1	2	2	3	2	3	1	2	3	3	4	2	TRUE	Shared Core
OG0000854	1	1	1	1	1	1	1	2	2	2	2	2	1	2	2	2	TRUE	Shared Core
OG0000855	2	2	2	2	2	2	2	2	2	2	2	2	2	2	2	2	TRUE	Shared Core
OG0000856	2	2	2	2	2	2	2	2	2	2	2	2	2	2	2	2	TRUE	Shared Core
OG0000857	2	1	2	1	2	2	2	3	3	3	4	2	2	2	4	2	TRUE	Shared Core
OG0000858	3	3	3	2	3	3	3	2	2	3	2	2	3	2	2	3	FALSE	Shared Core
OG0000859	1	1	1	1	1	1	2	3	4	3	5	3	3	5	4	3	FALSE	Shared Core
OG0000860	2	2	2	2	2	2	2	3	3	2	3	2	2	3	3	2	TRUE	Shared Core
OG0000861	2	2	2	2	2	2	2	6	2	3	3	2	2	2	5	2	FALSE	Shared Core
OG0000862	4	4	4	5	4	4	3	1	1	1	1	1	1	1	1	1	TRUE	Shared Core
OG0000863	1	1	1	1	1	2	1	2	3	2	3	1	2	3	2	6	TRUE	Shared Core
OG0000864	1	3	2	2	1	2	2	1	3	1	2	4	3	3	1	5	TRUE	Shared Core
OG0000865	2	2	1	1	2	1	1	3	3	3	3	3	3	3	3	3	TRUE	Shared Core
OG0000866	3	0	0	0	0	0	0	1	3	1	2	5	13	3	2	8	FALSE	Cni-unique core
OG0000867	1	1	2	2	2	2	2	2	3	1	2	2	2	3	3	4	TRUE	Shared Core
OG0000868	2	2	2	2	2	2	2	2	2	2	2	3	4	2	2	3	TRUE	Shared Core
OG0000869	2	1	2	2	2	1	2	3	2	2	2	2	2	2	2	2	TRUE	Shared Core
OG0000870	1	1	2	2	2	1	2	4	2	3	2	4	2	2	3	2	TRUE	Shared Core
OG0000871	2	2	2	2	2	2	2	2	2	4	2	2	1	2	2	2	TRUE	Shared Core
OG0000872	1	1	1	1	1	1	1	3	2	2	2	3	2	4	2	3	TRUE	Shared Core
OG0000873	1	1	1	1	1	1	1	2	3	2	2	3	1	2	2	3	TRUE	Shared Core
OG0000874	1	1	1	2	1	1	1	4	3	4	4	2	5	3	2	5	FALSE	Shared Core
OG0000875	1	1	1	0	1	1	1	3	4	4	4	4	3	3	5	5	FALSE	Cni-unique core
OG0000876	2	2	2	2	2	2	2	2	2	2	2	2	2	2	2	2	TRUE	Shared Core
OG0000877	2	2	1	1	2	2	2	2	2	2	2	2	2	4	2	3	TRUE	Shared Core
OG0000878	1	1	1	1	2	1	1	3	3	3	6	2	3	5	3	5	FALSE	Shared Core
OG0000879	2	2	2	2	2	2	2	2	3	2	3	2	2	2	2	2	TRUE	Shared Core
OG0000880	2	2	2	2	1	1	1	2	4	2	2	2	2	2	2	4	TRUE	Shared Core
OG0000881	2	2	3	3	1	2	1	3	1	2	3	3	5	3	1	5	FALSE	Shared Core
OG0000882	3	3	2	2	2	1	2	6	3	3	2	3	1	6	2	0	FALSE	Cbr-unique core
OG0000883	2	2	2	2	2	1	2	4	3	2	2	2	2	2	2	4	TRUE	Shared Core
OG0000884	1	1	1	1	1	1	1	2	4	2	2	1	1	2	1	4	TRUE	Shared Core
OG0000885	1	1	1	1	1	1	1	2	1	1	2	1	1	2	1	3	TRUE	Shared Core
OG0000886	1	1	2	2	1	1	2	2	3	2	2	1	2	2	2	3	TRUE	Shared Core
OG0000887	2	2	2	2	2	2	2	2	4	2	2	2	2	2	2	4	TRUE	Shared Core
OG0000888	3	4	2	2	2	2	2	1	1	2	2	2	1	1	2	1	TRUE	Shared Core
OG0000889	2	3	1	2	3	3	3	3	4	1	1	2	2	2	2	2	TRUE	Shared Core
OG0000890	2	2	2	2	2	2	2	3	3	3	3	3	2	3	3	3	FALSE	Shared Core
OG0000891	0	0	1	0	1	1	1	4	3	1	5	2	3	2	4	0	TRUE	Dispensable
OG0000892	0	1	2	0	0	1	1	2	7	3	5	4	5	4	3	2	FALSE	Cni-unique core
OG0000893	0	0	0	0	0	0	0	5	4	4	4	3	3	7	6	4	FALSE	Cni-specific
OG0000894	0	4	3	2	2	0	0	3	1	3	5	5	7	0	5	1	FALSE	Dispensable
OG0000895	0	0	0	0	0	0	0	9	2	5	6	4	3	1	5	6	FALSE	Cni-specific
OG0000896	1	1	2	2	2	2	2	2	4	2	4	3	5	4	2	2	FALSE	Shared Core
OG0000897	2	2	1	2	2	2	2	2	3	2	2	2	2	2	2	2	TRUE	Shared Core
OG0000898	2	2	2	2	2	2	2	2	2	2	2	2	2	2	2	2	TRUE	Shared Core
OG0000899	2	2	2	2	2	2	2	2	2	2	2	2	2	2	2	2	TRUE	Shared Core
OG0000900	2	2	1	1	1	2	1	2	3	2	2	3	2	3	2	3	TRUE	Shared Core
OG0000901	2	2	4	2	2	2	2	2	2	2	3	2	2	2	2	2	TRUE	Shared Core
OG0000902	2	2	2	2	2	2	2	2	2	2	2	2	3	2	2	2	TRUE	Shared Core
OG0000903	1	1	1	0	1	1	1	2	5	4	5	4	3	4	3	4	FALSE	Cni-unique core
OG0000904	1	1	2	2	2	1	2	2	6	8	3	1	1	0	1	4	TRUE	Cbr-unique core
OG0000905	2	2	2	2	2	2	2	2	2	2	2	2	2	2	2	2	TRUE	Shared Core
OG0000906	2	2	2	2	2	2	2	2	3	2	2	2	2	2	2	2	TRUE	Shared Core
OG0000907	3	2	2	2	4	3	3	2	2	4	2	2	2	2	2	3	FALSE	Shared Core
OG0000908	2	2	2	2	1	2	2	2	2	2	4	2	2	2	2	2	TRUE	Shared Core
OG0000909	2	2	2	2	2	2	2	2	3	2	2	2	2	2	2	2	TRUE	Shared Core
OG0000910	2	2	2	2	2	2	2	2	2	2	2	2	2	2	2	2	TRUE	Shared Core
OG0000911	2	2	2	2	2	2	2	3	3	1	3	2	2	3	3	2	TRUE	Shared Core
OG0000912	3	2	4	4	4	2	3	2	2	2	2	2	2	2	2	2	FALSE	Shared Core
OG0000913	1	2	2	1	3	2	1	4	5	1	2	2	4	4	3	3	FALSE	Shared Core
OG0000914	2	2	2	2	3	2	2	2	2	2	2	2	2	2	2	2	TRUE	Shared Core
OG0000915	2	2	2	2	2	2	2	2	2	2	2	2	2	2	2	2	TRUE	Shared Core
OG0000916	2	2	2	2	2	2	2	2	2	2	2	2	2	2	2	2	TRUE	Shared Core
OG0000917	2	2	2	2	2	2	2	2	2	2	2	2	2	2	2	2	TRUE	Shared Core
OG0000918	2	2	2	2	2	2	2	4	1	2	2	2	2	3	2	2	TRUE	Shared Core
OG0000919	2	2	2	2	2	2	2	2	2	2	2	2	2	2	2	2	TRUE	Shared Core
OG0000920	1	1	1	1	1	1	1	1	1	4	8	3	7	2	1	2	TRUE	Shared Core
OG0000921	1	2	2	2	3	2	2	2	2	2	2	2	2	2	3	2	TRUE	Shared Core
OG0000922	2	2	2	2	1	2	2	2	3	2	2	2	3	2	2	2	TRUE	Shared Core
OG0000923	2	3	2	2	2	2	1	3	2	2	2	2	2	2	2	3	TRUE	Shared Core
OG0000924	2	3	2	2	2	2	3	3	2	3	2	3	3	3	3	2	FALSE	Shared Core
OG0000925	2	2	2	2	2	2	4	0	6	2	1	1	2	4	3	5	FALSE	Cbr-unique core
OG0000926	2	2	2	2	2	2	2	2	2	2	2	2	2	2	2	4	TRUE	Shared Core
OG0000927	2	2	2	2	2	2	2	2	3	2	2	2	2	2	2	3	TRUE	Shared Core
OG0000928	2	2	2	2	2	2	2	2	2	2	2	2	2	2	2	2	TRUE	Shared Core
OG0000929	2	2	2	2	2	2	2	2	2	2	2	2	2	2	2	4	TRUE	Shared Core
OG0000930	2	2	2	2	2	2	2	2	2	2	2	2	2	2	2	2	TRUE	Shared Core
OG0000931	1	2	2	3	2	2	2	2	2	2	2	1	2	2	2	2	TRUE	Shared Core
OG0000932	2	2	2	2	2	2	2	2	2	2	2	2	2	2	2	2	TRUE	Shared Core
OG0000933	2	2	2	2	2	2	2	2	2	2	2	2	2	2	2	1	TRUE	Shared Core
OG0000934	2	1	1	0	1	1	0	3	4	4	6	2	4	4	4	3	FALSE	Cni-unique core
OG0000935	2	2	2	2	2	2	2	2	4	2	2	2	2	2	2	2	TRUE	Shared Core
OG0000936	1	3	2	3	5	3	3	3	3	1	2	3	2	1	1	2	FALSE	Shared Core
OG0000937	2	2	3	2	2	2	3	1	2	3	2	1	2	2	1	2	TRUE	Shared Core
OG0000938	1	2	2	2	2	2	2	2	2	2	2	2	2	3	2	2	TRUE	Shared Core
OG0000939	1	1	1	1	1	1	2	3	3	5	3	5	4	4	4	1	FALSE	Shared Core
OG0000940	2	2	2	2	2	2	2	2	2	2	2	2	2	2	2	2	TRUE	Shared Core
OG0000941	2	2	2	2	2	2	2	2	4	2	2	2	3	3	2	2	TRUE	Shared Core
OG0000942	0	0	0	0	0	0	0	2	3	2	8	2	3	3	6	6	TRUE	Cni-specific
OG0000943	0	0	0	0	0	0	0	0	0	0	0	0	0	0	0	0	TRUE	Cni-specific
OG0000944	0	1	1	0	0	0	0	4	5	3	4	5	2	4	6	4	FALSE	Cni-unique core
OG0000945	0	1	0	0	0	0	0	4	2	4	4	3	6	4	4	5	TRUE	Cni-unique core
OG0000946	0	0	0	0	0	0	0	0	0	0	0	0	0	0	0	0	FALSE	Cni-specific
OG0000947	0	1	1	1	2	0	1	3	3	4	4	3	4	4	5	3	FALSE	Cni-unique core
OG0000948	0	1	1	1	0	1	0	4	3	4	3	2	7	6	5	2	FALSE	Cni-unique core
OG0000949	0	2	1	1	1	1	1	3	6	5	7	3	4	0	2	3	FALSE	Dispensable
OG0000950	0	1	0	0	0	0	0	5	3	7	5	2	3	9	1	4	FALSE	Cni-unique core
OG0000951	0	0	0	0	0	0	0	3	5	5	5	5	4	4	5	4	FALSE	Cni-specific
OG0000952	3	2	2	2	2	3	2	2	2	2	2	2	2	2	2	2	TRUE	Shared Core
OG0000953	1	1	1	1	1	1	1	3	3	3	2	3	3	4	2	3	TRUE	Shared Core
OG0000954	2	2	2	2	2	2	2	2	2	2	2	3	2	2	2	3	TRUE	Shared Core
OG0000955	2	2	2	2	2	2	2	2	2	2	2	2	2	2	2	3	TRUE	Shared Core
OG0000956	2	2	3	3	3	2	2	2	2	2	2	2	2	2	3	2	TRUE	Shared Core
OG0000957	2	2	2	2	2	2	2	4	2	4	2	2	2	2	2	2	TRUE	Shared Core
OG0000958	1	1	1	1	1	2	3	2	2	2	3	2	2	2	2	2	TRUE	Shared Core
OG0000959	2	2	2	2	2	2	2	2	2	2	2	2	2	2	2	2	TRUE	Shared Core
OG0000960	1	1	1	1	1	1	1	5	4	6	2	3	2	4	2	4	FALSE	Shared Core
OG0000961	2	2	2	2	2	2	2	2	2	2	2	2	2	2	2	2	TRUE	Shared Core
OG0000962	2	2	2	2	2	2	2	2	2	3	2	2	2	2	2	2	TRUE	Shared Core
OG0000963	2	2	2	2	2	2	2	2	2	2	2	2	2	2	2	2	TRUE	Shared Core
OG0000964	2	2	2	1	2	2	2	2	2	2	4	2	2	2	4	2	TRUE	Shared Core
OG0000965	2	2	2	2	2	2	2	2	2	2	3	2	1	2	2	2	TRUE	Shared Core
OG0000966	3	2	2	2	2	2	2	2	2	2	2	2	2	2	2	2	TRUE	Shared Core
OG0000967	1	1	2	2	2	1	1	3	3	3	3	3	3	3	2	3	TRUE	Shared Core
OG0000968	2	2	2	2	2	2	2	2	2	3	2	2	2	2	2	2	TRUE	Shared Core
OG0000969	1	1	1	1	1	1	1	3	3	1	3	2	4	3	2	6	TRUE	Shared Core
OG0000970	2	2	2	2	2	2	2	2	2	2	2	2	2	2	2	2	TRUE	Shared Core
OG0000971	1	2	1	1	0	2	0	3	4	1	2	9	2	1	3	4	FALSE	Cni-unique core
OG0000972	2	2	2	2	2	2	2	2	2	2	2	2	2	2	2	2	TRUE	Shared Core
OG0000973	2	2	2	2	2	2	2	2	2	2	2	2	2	2	2	2	TRUE	Shared Core
OG0000974	2	2	2	2	2	2	1	3	3	3	2	3	3	3	3	3	FALSE	Shared Core
OG0000975	2	2	2	2	2	2	2	2	2	2	2	2	2	2	2	2	TRUE	Shared Core
OG0000976	2	2	2	2	2	2	2	2	2	2	2	2	2	2	2	3	TRUE	Shared Core
OG0000977	2	2	2	2	2	2	2	2	2	2	2	2	2	2	2	2	TRUE	Shared Core
OG0000978	1	1	0	0	0	1	1	4	3	5	5	2	3	5	4	4	FALSE	Cni-unique core
OG0000979	2	2	1	1	1	1	1	6	2	6	4	3	2	3	3	1	FALSE	Shared Core
OG0000980	2	2	2	2	2	2	2	2	2	2	2	2	2	3	2	4	TRUE	Shared Core
OG0000981	1	1	1	1	1	1	1	6	4	3	4	2	2	2	3	6	FALSE	Shared Core
OG0000982	1	1	1	1	1	1	2	4	4	4	3	0	3	4	4	5	FALSE	Cbr-unique core
OG0000983	2	2	2	2	2	2	2	2	2	2	2	2	2	2	2	2	TRUE	Shared Core
OG0000984	1	1	1	1	1	1	1	4	3	4	4	3	3	3	4	4	FALSE	Shared Core
OG0000985	2	2	2	2	2	1	2	2	5	2	3	2	2	3	2	3	FALSE	Shared Core
OG0000986	1	1	1	1	1	1	1	3	2	3	6	2	3	6	2	5	FALSE	Shared Core
OG0000987	2	1	2	2	2	1	2	2	4	2	4	2	2	2	2	6	FALSE	Shared Core
OG0000988	1	2	1	1	1	2	2	2	2	2	4	2	3	2	4	5	TRUE	Shared Core
OG0000989	2	2	2	2	2	2	2	2	2	2	2	2	2	2	2	4	FALSE	Shared Core
OG0000990	1	3	2	2	1	3	3	2	4	3	2	1	2	2	2	6	FALSE	Shared Core
OG0000991	2	2	2	2	2	2	3	2	2	2	3	2	2	2	2	3	TRUE	Shared Core
OG0000992	2	2	2	2	2	2	2	2	2	2	2	2	2	2	2	4	TRUE	Shared Core
OG0000993	2	2	2	2	2	2	2	2	2	2	2	2	2	2	2	2	TRUE	Shared Core
OG0000994	2	2	2	2	2	2	2	2	1	1	2	2	2	1	2	2	TRUE	Shared Core
OG0000995	1	1	2	1	2	2	2	2	2	2	3	2	2	2	2	3	TRUE	Shared Core
OG0000996	2	2	2	2	2	2	2	2	2	2	2	2	2	2	2	2	TRUE	Shared Core
OG0000997	2	1	1	1	1	1	1	2	2	3	3	3	3	3	3	2	TRUE	Shared Core
OG0000998	2	2	1	2	2	2	2	2	3	5	2	3	3	2	2	1	TRUE	Shared Core
OG0000999	1	3	2	2	2	2	2	2	3	2	3	2	2	2	2	2	TRUE	Shared Core
OG0001000	1	1	1	1	1	1	1	6	2	1	2	3	3	2	3	2	TRUE	Shared Core
OG0001001	2	1	2	2	3	2	2	2	4	2	2	2	2	2	2	2	TRUE	Shared Core
OG0001002	2	2	2	2	2	2	2	2	4	2	2	3	2	3	2	2	TRUE	Shared Core
OG0001003	1	1	1	1	2	1	1	3	3	1	5	3	2	3	2	4	FALSE	Shared Core
OG0001004	0	0	1	1	0	0	0	2	1	2	2	1	1	1	2	2	TRUE	Cni-unique core
OG0001005	0	0	0	0	0	0	0	7	1	1	6	5	0	2	6	5	TRUE	Cni-specific
OG0001006	0	2	3	2	5	1	2	1	2	2	2	3	1	3	1	4	TRUE	Cni-unique core
OG0001007	0	0	0	0	0	0	0	0	0	0	0	0	0	0	0	0	TRUE	Cni-specific
OG0001008	0	0	0	0	0	0	0	3	4	2	5	3	4	3	4	4	TRUE	Cni-specific
OG0001009	0	0	0	0	0	0	0	3	3	4	6	3	5	3	3	9	FALSE	Cni-specific
OG0001010	0	0	0	0	0	0	0	4	5	4	4	5	3	9	3	2	FALSE	Cni-specific
OG0001011	0	0	0	0	0	0	0	4	6	5	4	3	4	5	3	4	FALSE	Cni-specific
OG0001012	0	0	0	0	0	39	0	0	0	0	0	0	0	0	0	0	FALSE	Cbr-specific
OG0001013	2	2	2	2	2	2	2	2	4	2	2	2	2	2	2	2	TRUE	Shared Core
OG0001014	2	1	1	1	2	1	2	3	3	3	2	3	2	2	3	2	TRUE	Shared Core
OG0001015	2	2	2	2	2	2	2	2	2	2	2	2	2	2	2	2	TRUE	Shared Core
OG0001016	2	2	2	2	2	2	2	2	2	2	2	2	3	2	2	3	TRUE	Shared Core
OG0001017	2	2	2	2	2	2	2	2	2	2	2	2	2	2	2	2	TRUE	Shared Core
OG0001018	1	1	1	1	1	1	1	3	2	3	2	2	2	2	2	2	TRUE	Shared Core
OG0001019	2	2	2	2	2	2	2	3	2	2	3	2	2	2	2	2	TRUE	Shared Core
OG0001020	2	2	2	2	2	2	2	2	2	2	2	2	1	2	2	2	TRUE	Shared Core
OG0001021	2	2	2	2	2	2	2	2	2	1	2	2	2	2	2	2	TRUE	Shared Core
OG0001022	2	2	2	2	2	2	2	2	3	3	2	2	3	3	3	2	FALSE	Shared Core
OG0001023	1	1	1	1	1	1	1	2	2	2	2	2	2	4	2	7	TRUE	Shared Core
OG0001024	1	1	1	1	1	1	1	3	1	1	3	2	3	1	2	3	TRUE	Shared Core
OG0001025	1	1	3	3	1	1	2	2	3	2	3	3	2	4	4	3	FALSE	Shared Core
OG0001026	2	1	1	2	1	2	2	3	2	6	2	2	3	4	3	2	FALSE	Shared Core
OG0001027	2	2	2	2	2	2	2	2	2	2	2	2	2	2	2	2	TRUE	Shared Core
OG0001028	3	2	2	2	2	2	2	2	3	4	2	3	3	2	2	2	FALSE	Shared Core
OG0001029	2	2	2	2	2	2	2	2	2	3	2	2	2	2	3	3	FALSE	Shared Core
OG0001030	2	2	2	2	2	2	2	1	3	1	2	4	3	3	1	2	TRUE	Shared Core
OG0001031	2	2	2	2	2	2	2	2	2	2	2	2	2	2	2	2	TRUE	Shared Core
OG0001032	2	1	0	2	1	1	1	3	3	3	3	3	2	2	3	4	TRUE	Cni-unique core
OG0001033	2	2	2	2	2	2	3	2	2	2	2	2	2	2	2	2	TRUE	Shared Core
OG0001034	2	2	2	2	2	2	2	2	2	2	2	2	2	2	2	2	TRUE	Shared Core
OG0001035	2	2	2	2	2	2	2	2	2	2	2	2	2	2	2	2	TRUE	Shared Core
OG0001036	2	2	2	2	2	2	2	2	3	2	2	2	3	2	2	2	TRUE	Shared Core
OG0001037	2	2	2	2	2	2	2	2	2	2	2	2	2	2	2	2	TRUE	Shared Core
OG0001038	1	1	1	1	1	1	1	2	3	2	2	2	2	2	2	3	TRUE	Shared Core
OG0001039	1	1	1	2	2	1	2	3	3	3	3	3	3	4	3	3	FALSE	Shared Core
OG0001040	1	1	0	0	1	1	0	2	3	4	5	4	3	4	4	5	FALSE	Cni-unique core
OG0001041	2	2	2	2	2	2	2	2	2	2	2	2	2	2	2	2	TRUE	Shared Core
OG0001042	2	2	1	1	0	2	1	2	3	2	4	5	5	2	4	2	FALSE	Cni-unique core
OG0001043	1	1	1	1	1	1	1	1	8	2	7	3	3	1	6	0	FALSE	Cbr-unique core
OG0001044	2	2	2	2	2	2	2	2	2	2	2	2	2	2	2	2	TRUE	Shared Core
OG0001045	3	3	3	3	3	3	1	2	2	2	2	2	2	2	2	2	FALSE	Shared Core
OG0001046	1	2	5	2	0	2	1	4	3	3	3	2	2	2	3	3	FALSE	Cni-unique core
OG0001047	2	2	2	2	2	2	2	2	2	2	2	2	2	2	2	2	TRUE	Shared Core
OG0001048	2	2	2	2	1	2	2	3	3	3	2	2	2	2	2	3	FALSE	Shared Core
OG0001049	2	2	2	2	2	2	2	2	2	2	2	2	2	2	2	2	TRUE	Shared Core
OG0001050	1	1	1	1	2	1	3	3	3	3	4	2	3	2	2	5	FALSE	Shared Core
OG0001051	2	2	2	2	2	2	2	2	2	2	2	2	2	2	2	2	TRUE	Shared Core
OG0001052	2	2	2	2	2	2	2	2	2	2	2	2	2	2	2	3	TRUE	Shared Core
OG0001053	1	1	1	1	1	1	1	3	6	6	2	2	1	5	3	1	TRUE	Shared Core
OG0001054	1	1	2	2	0	1	3	3	1	4	3	2	3	4	4	4	FALSE	Cni-unique core
OG0001055	2	2	2	2	2	2	2	2	2	2	2	2	2	2	2	3	TRUE	Shared Core
OG0001056	2	1	2	1	1	2	2	2	1	2	2	2	2	2	2	2	TRUE	Shared Core
OG0001057	1	1	1	1	1	1	1	3	3	3	2	3	5	2	3	4	TRUE	Shared Core
OG0001058	1	1	0	0	0	1	0	2	5	3	2	5	2	9	2	2	FALSE	Cni-unique core
OG0001059	2	2	2	2	2	2	2	2	2	2	2	2	2	2	2	4	TRUE	Shared Core
OG0001060	2	2	2	2	2	2	2	2	2	2	2	2	2	2	2	2	TRUE	Shared Core
OG0001061	2	2	2	2	2	2	2	2	2	2	2	2	2	2	2	2	TRUE	Shared Core
OG0001062	2	2	2	2	2	2	3	2	2	2	2	2	3	2	3	3	TRUE	Shared Core
OG0001063	1	3	2	2	3	2	3	2	4	2	2	3	3	2	2	2	FALSE	Shared Core
OG0001064	1	1	1	2	2	1	2	2	4	2	4	4	2	2	2	2	TRUE	Shared Core
OG0001065	2	2	2	2	2	2	3	2	2	1	2	2	2	2	2	2	TRUE	Shared Core
OG0001066	2	2	2	2	3	2	2	2	2	2	2	2	2	2	2	2	TRUE	Shared Core
OG0001067	2	2	2	2	2	2	2	2	4	2	2	2	2	2	2	2	TRUE	Shared Core
OG0001068	2	2	1	2	2	2	2	2	2	2	2	2	2	2	2	4	TRUE	Shared Core
OG0001069	1	2	1	2	1	2	2	2	4	2	3	3	2	3	3	2	TRUE	Shared Core
OG0001070	2	1	2	1	1	1	1	3	4	2	3	3	2	2	2	3	TRUE	Shared Core
OG0001071	1	2	2	2	1	2	2	2	1	1	0	1	3	1	3	3	TRUE	Cbr-unique core
OG0001072	2	2	1	1	2	2	2	2	2	2	2	2	2	2	2	1	TRUE	Shared Core
OG0001073	2	2	2	2	2	2	2	2	2	2	2	2	2	2	1	2	TRUE	Shared Core
OG0001074	2	2	1	2	1	2	2	2	2	2	2	2	2	2	2	2	TRUE	Shared Core
OG0001075	2	2	2	2	2	2	2	2	2	2	2	2	2	2	2	2	TRUE	Shared Core
OG0001076	2	2	2	2	2	2	2	2	4	2	2	2	2	2	2	2	TRUE	Shared Core
OG0001077	2	2	2	2	2	2	2	2	2	2	2	2	2	2	3	2	TRUE	Shared Core
OG0001078	2	2	2	2	2	2	2	2	4	2	2	1	2	2	2	2	TRUE	Shared Core
OG0001079	2	5	2	2	1	2	2	2	2	2	2	2	2	2	2	2	TRUE	Shared Core
OG0001080	2	1	1	3	0	2	1	3	3	3	3	3	3	3	4	2	FALSE	Cni-unique core
OG0001081	1	1	1	1	1	2	1	1	1	0	0	0	0	0	0	0	TRUE	Cbr-unique core
OG0001082	2	2	2	2	2	2	2	2	4	2	3	2	2	2	2	2	TRUE	Shared Core
OG0001083	0	0	2	2	3	0	2	2	4	4	2	2	2	2	5	3	TRUE	Cni-unique core
OG0001084	0	0	0	0	0	0	0	4	7	3	2	4	1	4	5	3	TRUE	Cni-specific
OG0001085	0	0	0	0	0	0	0	0	0	0	0	0	0	0	0	0	TRUE	Cni-specific
OG0001086	0	1	1	2	2	1	1	3	2	2	1	3	2	2	3	2	TRUE	Cni-unique core
OG0001087	0	0	0	0	0	0	0	0	0	0	0	0	0	0	0	0	FALSE	Cni-specific
OG0001088	0	0	2	2	4	0	2	2	3	3	3	2	4	4	2	4	FALSE	Cni-unique core
OG0001089	0	0	0	0	0	0	0	4	3	4	4	4	9	3	3	4	FALSE	Cni-specific
OG0001090	0	0	2	1	0	0	0	2	3	4	3	4	4	8	4	3	FALSE	Cni-unique core
OG0001091	2	3	2	4	2	3	3	2	2	2	5	3	0	2	1	1	FALSE	Cbr-unique core
OG0001092	2	2	2	2	2	2	2	2	2	2	2	2	2	2	2	2	TRUE	Shared Core
OG0001093	2	2	2	2	2	2	2	2	2	2	2	2	2	2	2	2	TRUE	Shared Core
OG0001094	2	2	2	2	2	2	2	2	2	2	2	2	2	2	2	2	TRUE	Shared Core
OG0001095	2	2	2	2	2	2	2	2	2	2	2	2	2	2	1	2	TRUE	Shared Core
OG0001096	3	3	3	3	1	6	3	4	4	1	1	1	1	1	1	1	FALSE	Shared Core
OG0001097	2	2	2	2	2	2	1	2	2	2	2	2	2	2	2	2	TRUE	Shared Core
OG0001098	2	2	4	2	2	2	2	2	2	2	2	2	2	2	2	2	TRUE	Shared Core
OG0001099	2	2	2	2	2	2	2	2	2	2	2	2	2	2	4	1	TRUE	Shared Core
OG0001100	6	6	6	3	2	6	6	0	0	0	0	0	1	0	0	0	FALSE	Cbr-unique core
OG0001101	2	2	2	2	2	2	2	2	2	2	2	2	2	2	2	3	TRUE	Shared Core
OG0001102	2	2	2	2	1	2	2	2	3	2	2	2	2	2	2	3	TRUE	Shared Core
OG0001103	1	1	2	2	2	1	2	2	2	2	2	2	2	2	2	2	TRUE	Shared Core
OG0001104	2	2	2	2	2	2	2	2	2	2	2	2	7	2	2	2	FALSE	Shared Core
OG0001105	3	3	3	3	3	3	3	3	1	1	2	3	2	0	2	2	FALSE	Cbr-unique core
OG0001106	1	1	1	1	1	1	1	1	3	3	3	3	3	3	5	3	TRUE	Shared Core
OG0001107	2	2	2	2	2	2	2	2	2	2	2	2	2	2	2	2	TRUE	Shared Core
OG0001108	1	0	1	1	0	1	0	5	3	3	5	2	3	2	3	3	TRUE	Cni-unique core
OG0001109	2	2	2	2	2	2	2	2	3	3	2	2	2	2	2	2	TRUE	Shared Core
OG0001110	1	1	2	2	2	1	2	2	3	3	3	3	2	3	3	3	FALSE	Shared Core
OG0001111	2	2	2	2	2	2	2	2	2	2	2	2	2	2	2	2	TRUE	Shared Core
OG0001112	1	1	3	3	3	1	2	2	2	3	5	1	2	2	1	1	TRUE	Shared Core
OG0001113	3	3	0	0	0	3	0	2	3	5	3	1	2	3	6	3	FALSE	Cni-unique core
OG0001114	2	1	1	2	1	2	1	2	2	2	2	3	2	3	2	2	TRUE	Shared Core
OG0001115	2	2	2	2	2	2	2	2	2	2	2	3	2	2	2	2	TRUE	Shared Core
OG0001116	2	2	2	2	2	2	2	2	2	2	2	2	3	2	2	3	TRUE	Shared Core
OG0001117	1	1	1	1	1	1	1	4	2	2	2	3	3	2	2	3	TRUE	Shared Core
OG0001118	2	2	2	2	2	2	2	2	2	2	2	2	2	2	2	2	TRUE	Shared Core
OG0001119	2	2	2	2	2	2	2	2	2	2	2	3	2	2	2	2	TRUE	Shared Core
OG0001120	2	2	2	2	2	2	2	2	2	2	2	2	2	2	2	2	TRUE	Shared Core
OG0001121	2	2	2	2	2	2	2	2	2	2	2	2	2	2	2	2	TRUE	Shared Core
OG0001122	2	2	2	2	2	2	2	2	2	2	2	2	2	2	2	2	TRUE	Shared Core
OG0001123	2	2	2	2	2	2	2	3	2	2	2	2	2	2	2	2	TRUE	Shared Core
OG0001124	2	2	2	2	2	2	2	2	2	2	2	2	2	2	2	2	TRUE	Shared Core
OG0001125	1	1	1	1	1	1	1	6	2	2	5	1	4	2	2	2	TRUE	Shared Core
OG0001126	1	1	1	1	1	1	1	2	5	2	7	3	2	5	2	2	FALSE	Shared Core
OG0001127	1	1	1	1	1	1	1	3	4	3	4	3	3	4	4	2	FALSE	Shared Core
OG0001128	2	2	1	2	2	2	2	2	2	2	2	2	2	2	2	2	TRUE	Shared Core
OG0001129	2	2	1	1	3	2	2	3	6	1	4	1	1	1	5	2	FALSE	Shared Core
OG0001130	1	1	1	1	1	1	1	6	2	6	2	1	3	2	2	5	FALSE	Shared Core
OG0001131	1	1	1	1	1	1	2	3	2	3	3	3	3	6	3	3	FALSE	Shared Core
OG0001132	1	1	1	1	1	1	1	3	3	3	3	3	3	2	3	3	TRUE	Shared Core
OG0001133	2	2	2	2	2	2	2	2	2	2	2	2	2	2	2	2	TRUE	Shared Core
OG0001134	2	2	2	2	2	2	2	2	2	2	2	2	2	2	2	2	TRUE	Shared Core
OG0001135	2	2	2	2	2	2	2	2	2	2	2	2	2	2	2	2	TRUE	Shared Core
OG0001136	3	3	2	3	3	3	3	1	2	1	1	1	1	1	1	1	TRUE	Shared Core
OG0001137	2	2	2	2	1	2	2	2	2	2	2	2	2	2	2	2	TRUE	Shared Core
OG0001138	2	2	2	2	2	2	2	2	2	2	2	2	2	2	2	3	TRUE	Shared Core
OG0001139	2	2	1	2	1	1	3	2	2	2	3	2	2	2	3	2	TRUE	Shared Core
OG0001140	2	2	2	2	2	2	2	2	2	4	2	2	2	2	2	2	TRUE	Shared Core
OG0001141	2	2	2	2	2	2	2	1	1	2	2	2	2	3	2	4	TRUE	Shared Core
OG0001142	2	2	2	2	2	2	2	2	2	2	2	2	2	2	2	4	TRUE	Shared Core
OG0001143	1	2	3	1	2	2	2	1	1	0	1	3	1	1	5	3	TRUE	Cbr-unique core
OG0001144	1	1	1	0	1	1	1	4	6	1	2	2	5	3	3	3	FALSE	Cni-unique core
OG0001145	1	0	0	0	1	0	1	3	3	3	4	4	4	4	2	4	TRUE	Cni-unique core
OG0001146	2	2	2	2	2	2	2	2	2	2	2	2	2	2	2	2	TRUE	Shared Core
OG0001147	2	2	2	2	2	2	2	3	2	3	2	3	2	2	2	2	TRUE	Shared Core
OG0001148	2	2	2	2	2	2	2	2	3	2	2	2	2	2	2	2	TRUE	Shared Core
OG0001149	2	2	2	2	2	2	2	2	2	2	2	2	2	3	2	3	TRUE	Shared Core
OG0001150	2	1	1	1	1	1	1	2	5	2	3	3	2	3	2	4	TRUE	Shared Core
OG0001151	2	2	2	2	1	2	2	1	3	2	6	2	3	3	1	3	FALSE	Shared Core
OG0001152	1	2	2	2	2	2	3	2	3	2	2	4	1	1	2	3	TRUE	Shared Core
OG0001153	2	2	2	2	2	1	2	2	4	2	2	0	2	2	2	4	TRUE	Cbr-unique core
OG0001154	1	1	1	1	1	1	1	3	3	1	6	3	2	2	2	5	TRUE	Shared Core
OG0001155	1	1	1	1	1	2	1	2	5	2	2	2	2	2	3	6	TRUE	Shared Core
OG0001156	2	2	2	1	2	1	2	2	3	2	2	2	2	2	2	3	TRUE	Shared Core
OG0001157	2	1	1	1	1	1	1	2	2	2	2	2	2	2	2	4	TRUE	Shared Core
OG0001158	2	2	2	2	2	2	2	2	4	2	2	2	2	2	2	2	TRUE	Shared Core
OG0001159	2	2	2	2	2	2	2	2	4	2	2	2	2	2	2	4	FALSE	Shared Core
OG0001160	2	2	1	1	2	2	2	2	2	2	3	2	2	2	2	4	TRUE	Shared Core
OG0001161	2	2	2	2	2	2	2	1	2	2	2	2	2	2	2	2	TRUE	Shared Core
OG0001162	2	2	2	2	2	2	2	2	2	2	2	2	2	2	2	2	TRUE	Shared Core
OG0001163	2	3	2	2	2	3	3	2	1	1	3	2	4	2	2	3	FALSE	Shared Core
OG0001164	2	2	2	2	2	2	2	2	2	2	2	2	2	2	2	2	TRUE	Shared Core
OG0001165	2	2	2	2	2	2	2	2	2	2	2	2	2	2	2	2	TRUE	Shared Core
OG0001166	2	2	2	2	2	2	2	2	2	2	2	2	2	2	2	2	TRUE	Shared Core
OG0001167	2	2	2	2	2	2	2	2	2	2	2	2	2	2	2	2	TRUE	Shared Core
OG0001168	2	2	2	2	2	2	2	2	2	2	2	2	2	2	2	2	TRUE	Shared Core
OG0001169	1	2	2	2	1	2	2	2	4	2	2	2	2	2	2	2	TRUE	Shared Core
OG0001170	2	2	2	2	2	2	2	2	2	2	2	2	2	2	2	2	TRUE	Shared Core
OG0001171	2	2	2	2	2	2	2	2	4	2	2	2	2	3	2	2	TRUE	Shared Core
OG0001172	1	2	2	2	2	1	2	2	3	2	2	1	2	2	2	2	TRUE	Shared Core
OG0001173	1	2	1	2	2	2	2	1	2	5	2	3	2	2	2	1	TRUE	Shared Core
OG0001174	2	3	2	2	2	2	2	2	2	2	2	2	2	2	2	1	TRUE	Shared Core
OG0001175	1	2	1	1	1	1	1	3	5	3	3	3	2	3	3	3	FALSE	Shared Core
OG0001176	0	1	1	1	2	2	1	1	1	1	4	1	1	1	1	1	TRUE	Cni-unique core
OG0001177	0	1	1	1	1	1	1	1	1	1	1	2	2	3	2	5	TRUE	Cni-unique core
OG0001178	0	0	0	0	0	0	0	3	3	3	2	3	3	2	2	3	TRUE	Cni-specific
OG0001179	0	0	0	0	0	0	0	4	4	5	3	3	1	3	3	4	TRUE	Cni-specific
OG0001180	0	0	0	0	0	0	0	1	4	2	6	4	1	2	3	4	TRUE	Cni-specific
OG0001181	0	1	0	1	1	1	1	4	2	3	2	3	3	3	3	3	TRUE	Cni-unique core
OG0001182	0	0	0	0	0	0	0	3	2	6	3	3	4	3	1	9	TRUE	Cni-specific
OG0001183	0	0	0	0	0	0	0	3	3	5	6	4	4	6	4	1	FALSE	Cni-specific
OG0001184	0	0	0	0	0	0	0	4	3	4	7	4	4	4	4	3	FALSE	Cni-specific
OG0001185	0	0	1	1	1	0	1	6	2	4	2	5	4	2	2	6	FALSE	Cni-unique core
OG0001186	0	0	1	0	1	0	1	2	2	2	6	5	7	3	1	6	FALSE	Cni-unique core
OG0001187	0	0	0	0	0	0	2	4	2	4	2	5	6	4	2	6	FALSE	Cni-unique core
OG0001188	2	1	1	1	1	2	2	2	4	2	2	2	0	2	2	2	TRUE	Cbr-unique core
OG0001189	2	2	2	3	2	2	2	2	3	1	2	2	1	2	2	2	TRUE	Shared Core
OG0001190	2	2	2	2	2	2	2	3	1	1	3	1	3	3	3	1	TRUE	Shared Core
OG0001191	1	1	1	1	1	1	1	4	2	4	3	1	1	3	4	2	TRUE	Shared Core
OG0001192	3	2	2	2	2	2	2	2	2	1	2	2	2	2	2	2	TRUE	Shared Core
OG0001193	2	2	2	2	2	2	2	2	2	2	2	2	2	2	2	2	TRUE	Shared Core
OG0001194	2	2	2	2	2	2	2	2	2	2	2	2	2	2	2	2	TRUE	Shared Core
OG0001195	2	2	2	2	2	2	2	2	2	2	2	3	2	2	2	2	TRUE	Shared Core
OG0001196	2	2	2	0	4	3	1	4	2	3	3	1	3	2	2	2	FALSE	Cni-unique core
OG0001197	2	2	2	1	2	2	2	2	2	2	2	2	2	2	2	2	TRUE	Shared Core
OG0001198	2	2	2	2	2	2	2	3	3	3	3	2	3	3	1	1	FALSE	Shared Core
OG0001199	1	1	1	1	1	1	1	3	3	3	4	4	3	3	3	3	FALSE	Shared Core
OG0001200	1	0	0	1	0	1	1	3	6	3	4	2	4	3	2	5	FALSE	Cni-unique core
OG0001201	1	1	2	2	2	1	0	1	2	2	3	2	2	4	3	2	TRUE	Cni-unique core
OG0001202	1	1	2	2	1	2	1	2	2	2	1	2	1	2	2	3	TRUE	Shared Core
OG0001203	2	2	2	2	2	2	2	2	2	2	2	2	2	2	2	2	TRUE	Shared Core
OG0001204	2	2	1	1	1	1	1	4	2	4	3	1	2	1	3	1	TRUE	Shared Core
OG0001205	2	2	2	2	2	2	2	2	2	2	2	2	2	2	2	2	TRUE	Shared Core
OG0001206	2	2	2	2	1	2	2	2	3	2	2	2	2	2	2	4	FALSE	Shared Core
OG0001207	2	2	1	1	1	1	1	3	2	2	1	2	3	3	2	2	TRUE	Shared Core
OG0001208	2	2	2	2	2	2	2	2	2	2	2	2	2	2	3	2	TRUE	Shared Core
OG0001209	2	2	2	2	2	2	2	2	2	2	2	2	2	2	1	1	TRUE	Shared Core
OG0001210	2	2	1	2	2	2	2	3	3	2	2	2	2	2	3	4	FALSE	Shared Core
OG0001211	2	2	2	2	2	2	2	2	2	2	2	2	2	2	2	2	TRUE	Shared Core
OG0001212	1	1	2	2	2	1	1	2	2	2	2	2	2	2	2	2	TRUE	Shared Core
OG0001213	2	2	2	2	2	2	2	2	2	2	2	1	2	2	2	2	TRUE	Shared Core
OG0001214	2	2	2	2	2	2	2	2	2	2	2	2	2	2	2	2	TRUE	Shared Core
OG0001215	2	2	2	2	2	3	1	2	2	2	2	2	2	2	2	2	TRUE	Shared Core
OG0001216	1	2	2	2	2	2	2	2	2	2	2	2	2	2	2	2	TRUE	Shared Core
OG0001217	2	2	2	2	2	2	2	2	2	2	2	2	2	2	2	2	TRUE	Shared Core
OG0001218	2	2	2	2	2	2	2	3	2	1	2	1	1	2	3	2	TRUE	Shared Core
OG0001219	2	2	2	2	2	2	2	2	2	2	2	2	1	2	2	3	TRUE	Shared Core
OG0001220	2	2	2	2	2	2	2	2	2	2	2	2	2	2	2	2	TRUE	Shared Core
OG0001221	1	1	1	1	1	1	1	1	7	2	5	3	3	2	4	2	FALSE	Shared Core
OG0001222	2	2	1	1	1	2	1	2	2	2	3	2	2	2	2	1	TRUE	Shared Core
OG0001223	3	2	1	1	1	1	1	4	1	3	2	4	1	2	2	3	TRUE	Shared Core
OG0001224	2	2	2	2	1	1	2	2	3	2	3	2	2	3	4	3	FALSE	Shared Core
OG0001225	2	1	3	3	2	2	3	2	1	2	1	3	3	1	1	3	TRUE	Shared Core
OG0001226	1	1	1	1	1	1	1	5	2	4	2	2	4	3	3	4	FALSE	Shared Core
OG0001227	2	2	2	2	2	2	2	2	2	2	2	2	2	2	2	2	TRUE	Shared Core
OG0001228	2	2	3	2	2	2	2	2	2	2	2	2	2	2	2	2	TRUE	Shared Core
OG0001229	1	1	0	0	1	1	1	3	4	5	4	2	4	2	4	3	FALSE	Cni-unique core
OG0001230	2	3	1	3	2	3	2	1	1	1	3	3	1	2	0	2	FALSE	Cbr-unique core
OG0001231	3	3	3	3	3	2	3	2	2	2	2	1	1	2	2	1	FALSE	Shared Core
OG0001232	2	2	2	2	2	2	2	2	2	2	4	2	3	2	3	2	FALSE	Shared Core
OG0001233	1	2	2	2	1	2	2	2	2	2	2	2	2	2	2	2	TRUE	Shared Core
OG0001234	2	2	2	2	2	2	2	2	2	2	2	2	2	2	2	2	TRUE	Shared Core
OG0001235	2	2	2	2	2	2	2	2	3	2	2	2	2	2	2	2	TRUE	Shared Core
OG0001236	1	1	1	1	1	1	1	2	2	3	3	2	3	6	2	6	FALSE	Shared Core
OG0001237	1	2	2	2	2	2	2	2	3	2	2	2	2	2	2	2	TRUE	Shared Core
OG0001238	2	2	2	2	2	2	2	2	2	2	2	2	2	2	2	4	TRUE	Shared Core
OG0001239	1	2	1	1	1	2	2	4	2	2	3	1	4	2	5	1	FALSE	Shared Core
OG0001240	2	2	2	2	2	2	2	2	2	2	2	2	2	2	2	3	TRUE	Shared Core
OG0001241	2	1	1	2	2	2	2	1	1	1	2	2	3	1	2	2	TRUE	Shared Core
OG0001242	1	1	2	2	2	1	2	2	2	2	2	2	2	2	2	2	TRUE	Shared Core
OG0001243	2	2	1	0	1	2	1	3	2	2	2	5	2	3	2	2	TRUE	Cni-unique core
OG0001244	2	1	1	1	2	2	1	2	3	2	1	1	2	2	2	4	TRUE	Shared Core
OG0001245	2	2	2	2	2	1	2	2	2	2	2	2	2	2	2	2	TRUE	Shared Core
OG0001246	2	2	2	2	2	2	2	2	2	2	2	2	2	3	2	2	TRUE	Shared Core
OG0001247	2	2	3	2	2	2	2	2	2	2	2	2	1	3	4	2	FALSE	Shared Core
OG0001248	1	2	1	1	1	2	1	4	2	3	2	3	2	2	3	5	FALSE	Shared Core
OG0001249	2	2	2	2	2	2	2	2	2	2	1	2	2	1	2	4	TRUE	Shared Core
OG0001250	2	2	2	2	2	2	2	2	3	2	2	2	2	2	1	3	TRUE	Shared Core
OG0001251	2	2	2	2	2	2	2	1	3	1	2	3	2	2	2	4	FALSE	Shared Core
OG0001252	1	2	2	2	2	1	2	2	3	2	2	2	1	2	2	2	TRUE	Shared Core
OG0001253	3	2	2	2	1	2	2	2	4	2	2	2	2	2	2	4	FALSE	Shared Core
OG0001254	2	2	2	2	2	2	3	2	2	2	2	2	2	2	2	2	TRUE	Shared Core
OG0001255	3	1	1	1	1	1	1	2	3	2	2	2	2	2	2	4	TRUE	Shared Core
OG0001256	4	4	3	4	3	3	3	1	2	1	2	1	1	1	1	2	FALSE	Shared Core
OG0001257	2	2	2	2	2	2	1	2	1	1	2	2	2	2	2	1	TRUE	Shared Core
OG0001258	2	2	2	2	2	2	2	2	2	2	2	2	2	2	2	2	TRUE	Shared Core
OG0001259	2	2	2	2	2	2	2	2	2	2	2	2	2	2	2	2	TRUE	Shared Core
OG0001260	3	1	2	1	2	1	1	2	2	2	2	2	2	2	3	1	TRUE	Shared Core
OG0001261	2	1	1	1	1	2	0	2	2	2	2	2	3	3	2	2	TRUE	Cni-unique core
OG0001262	2	2	2	2	2	2	2	2	2	2	2	2	2	2	2	2	TRUE	Shared Core
OG0001263	1	1	2	2	2	1	1	3	1	2	2	3	2	3	1	2	TRUE	Shared Core
OG0001264	2	2	2	2	2	2	2	2	2	2	2	2	2	2	2	2	TRUE	Shared Core
OG0001265	2	2	2	2	1	2	2	2	2	2	2	2	2	2	2	2	TRUE	Shared Core
OG0001266	2	2	2	2	2	2	2	2	2	2	2	2	2	2	2	2	TRUE	Shared Core
OG0001267	2	2	2	2	2	2	2	2	4	2	2	2	2	2	2	2	FALSE	Shared Core
OG0001268	1	1	2	2	2	1	1	2	6	2	2	2	2	2	2	2	TRUE	Shared Core
OG0001269	1	1	1	1	1	1	1	2	7	3	3	2	3	2	2	3	FALSE	Shared Core
OG0001270	2	1	1	1	1	1	1	3	3	3	3	3	3	4	3	3	FALSE	Shared Core
OG0001271	1	1	1	1	1	1	1	2	2	2	2	2	2	2	2	2	TRUE	Shared Core
OG0001272	1	1	2	2	2	2	1	2	4	2	8	1	3	2	1	2	FALSE	Shared Core
OG0001273	2	2	1	1	2	2	1	3	3	2	3	2	2	2	3	5	FALSE	Shared Core
OG0001274	1	0	1	2	0	1	0	1	7	1	2	3	5	4	1	3	FALSE	Cni-unique core
OG0001275	1	0	0	0	1	1	1	4	4	2	6	3	4	3	3	3	FALSE	Cni-unique core
OG0001276	0	0	0	0	0	0	0	0	0	0	0	0	0	0	0	0	FALSE	Cni-specific
OG0001277	0	1	1	1	1	0	2	3	3	3	3	3	3	3	3	2	TRUE	Cni-unique core
OG0001278	0	2	2	2	2	1	2	2	2	2	3	1	2	2	1	1	TRUE	Cni-unique core
OG0001279	0	2	0	0	1	1	0	5	5	3	3	3	3	3	3	3	FALSE	Cni-unique core
OG0001280	0	0	0	0	0	0	0	4	4	6	6	5	3	5	3	0	FALSE	Cni-specific
OG0001281	0	0	0	0	0	0	0	3	3	7	3	4	5	3	2	6	FALSE	Cni-specific
OG0001282	0	0	0	0	0	0	0	0	0	0	0	0	0	0	0	0	FALSE	Cni-specific
OG0001283	2	1	2	1	2	1	1	2	4	2	2	2	1	1	2	2	TRUE	Shared Core
OG0001284	2	1	2	2	2	2	2	2	2	2	2	2	2	2	2	2	TRUE	Shared Core
OG0001285	2	2	2	2	2	2	2	2	2	2	2	2	2	2	2	2	TRUE	Shared Core
OG0001286	2	2	1	1	1	2	1	2	2	2	2	2	2	2	2	2	TRUE	Shared Core
OG0001287	2	2	2	2	2	2	2	2	1	2	3	2	1	1	2	1	TRUE	Shared Core
OG0001288	2	2	2	2	2	2	2	2	2	2	2	2	2	2	2	2	TRUE	Shared Core
OG0001289	2	2	2	2	2	2	2	2	2	2	2	2	2	2	2	2	TRUE	Shared Core
OG0001290	1	2	1	1	2	1	0	3	1	2	2	6	6	3	3	1	FALSE	Cni-unique core
OG0001291	2	2	2	2	2	2	2	2	2	2	2	2	2	2	2	2	TRUE	Shared Core
OG0001292	2	2	2	2	2	2	2	2	2	2	2	2	2	2	2	2	TRUE	Shared Core
OG0001293	1	1	1	1	1	1	2	2	1	2	2	2	2	2	2	2	TRUE	Shared Core
OG0001294	2	2	2	2	2	2	2	2	2	2	2	2	2	2	2	2	TRUE	Shared Core
OG0001295	2	2	2	2	2	2	2	2	2	2	2	2	2	2	2	2	TRUE	Shared Core
OG0001296	2	2	2	2	2	2	2	1	2	2	1	3	2	2	2	2	TRUE	Shared Core
OG0001297	2	2	2	2	2	3	2	1	2	1	3	2	2	2	2	2	TRUE	Shared Core
OG0001298	2	2	2	2	2	2	2	2	2	2	2	2	2	2	2	2	TRUE	Shared Core
OG0001299	1	2	1	1	1	2	1	2	0	1	1	1	1	0	1	2	TRUE	Cbr-unique core
OG0001300	1	2	2	3	1	1	1	1	2	1	2	2	2	1	2	2	TRUE	Shared Core
OG0001301	1	2	2	2	1	2	1	2	2	2	4	3	3	2	4	2	FALSE	Shared Core
OG0001302	2	1	2	2	2	2	1	3	2	3	3	3	2	2	2	3	FALSE	Shared Core
OG0001303	2	2	2	2	2	2	2	2	2	2	4	2	2	2	3	2	FALSE	Shared Core
OG0001304	2	2	2	2	2	2	2	2	2	2	2	2	2	2	2	2	TRUE	Shared Core
OG0001305	2	2	2	2	2	2	2	2	2	2	2	2	2	1	2	2	TRUE	Shared Core
OG0001306	2	2	2	2	2	2	1	2	2	2	2	2	2	2	2	2	TRUE	Shared Core
OG0001307	2	1	2	2	2	1	2	2	1	2	2	2	2	1	5	2	TRUE	Shared Core
OG0001308	1	3	2	2	1	1	1	2	1	1	1	3	1	1	1	2	TRUE	Shared Core
OG0001309	2	2	2	2	2	2	2	2	2	2	2	1	2	2	2	2	TRUE	Shared Core
OG0001310	1	2	1	1	1	1	2	2	3	2	2	3	3	3	2	2	TRUE	Shared Core
OG0001311	2	1	1	2	1	1	2	2	2	2	2	2	2	2	2	2	TRUE	Shared Core
OG0001312	2	2	2	1	3	2	1	4	5	0	1	2	4	2	2	2	FALSE	Cbr-unique core
OG0001313	2	2	2	2	2	2	2	3	2	3	2	2	2	2	2	2	FALSE	Shared Core
OG0001314	2	2	1	0	1	2	1	2	4	1	1	4	1	3	2	5	TRUE	Cni-unique core
OG0001315	2	2	2	2	2	2	2	2	2	2	2	2	2	2	2	2	TRUE	Shared Core
OG0001316	2	2	2	2	3	4	1	2	2	2	2	2	1	2	2	2	TRUE	Shared Core
OG0001317	2	2	2	2	2	2	1	2	2	2	2	2	2	2	2	2	TRUE	Shared Core
OG0001318	2	2	2	2	2	2	2	1	2	1	2	2	2	2	2	2	TRUE	Shared Core
OG0001319	2	2	2	2	2	2	2	2	2	2	2	2	2	2	2	2	TRUE	Shared Core
OG0001320	2	2	3	2	3	2	2	2	2	1	3	3	3	1	3	1	FALSE	Shared Core
OG0001321	2	2	2	2	2	2	2	2	2	2	2	2	2	2	2	2	TRUE	Shared Core
OG0001322	1	2	2	2	2	2	2	2	2	2	2	2	2	2	2	2	TRUE	Shared Core
OG0001323	1	1	1	1	1	1	4	3	2	3	3	2	2	5	3	2	FALSE	Shared Core
OG0001324	2	2	2	2	2	2	2	2	2	2	2	2	2	2	2	2	TRUE	Shared Core
OG0001325	1	1	1	1	1	1	1	2	2	2	2	2	2	2	2	2	TRUE	Shared Core
OG0001326	2	2	2	2	2	2	2	2	2	2	2	2	2	2	2	2	TRUE	Shared Core
OG0001327	2	1	2	2	2	2	2	2	3	2	3	2	2	1	1	3	TRUE	Shared Core
OG0001328	2	2	2	2	1	2	2	2	2	2	2	2	2	2	2	2	TRUE	Shared Core
OG0001329	1	1	2	2	2	1	2	2	2	2	2	3	3	2	3	5	FALSE	Shared Core
OG0001330	1	2	2	2	2	2	2	1	2	1	2	2	3	1	3	4	TRUE	Shared Core
OG0001331	2	2	2	2	2	2	2	2	2	3	2	2	2	2	1	2	TRUE	Shared Core
OG0001332	2	2	2	2	2	2	2	2	2	2	2	2	2	2	2	2	TRUE	Shared Core
OG0001333	1	1	1	0	1	1	1	1	7	2	4	0	0	1	3	6	TRUE	Dispensable
OG0001334	3	3	2	2	2	3	1	1	1	2	2	2	2	2	1	2	TRUE	Shared Core
OG0001335	1	1	1	1	1	1	1	1	1	1	1	1	1	1	1	1	TRUE	Shared Core
OG0001336	2	1	1	1	1	1	1	2	2	2	2	2	2	2	2	4	TRUE	Shared Core
OG0001337	1	1	1	1	1	1	1	3	2	4	2	7	3	1	3	3	FALSE	Shared Core
OG0001338	2	1	1	1	2	2	1	2	2	2	2	2	2	2	2	2	TRUE	Shared Core
OG0001339	2	2	2	2	2	2	2	2	2	2	2	1	2	1	3	1	TRUE	Shared Core
OG0001340	2	2	2	2	1	2	2	2	2	2	2	2	2	2	2	2	TRUE	Shared Core
OG0001341	2	2	2	2	2	2	2	2	1	2	1	1	1	1	2	3	TRUE	Shared Core
OG0001342	2	2	2	2	2	2	2	2	3	2	2	2	2	2	2	3	FALSE	Shared Core
OG0001343	2	1	1	1	1	1	1	2	4	2	2	2	2	2	2	2	TRUE	Shared Core
OG0001344	2	1	1	1	1	1	2	2	2	2	2	2	2	2	2	4	TRUE	Shared Core
OG0001345	1	1	1	1	1	1	1	1	5	3	3	1	1	1	2	3	TRUE	Shared Core
OG0001346	2	2	1	1	1	2	1	1	4	4	1	3	1	3	1	2	TRUE	Shared Core
OG0001347	2	2	2	2	2	2	2	2	3	2	2	2	2	2	2	3	FALSE	Shared Core
OG0001348	2	2	2	2	2	2	2	2	2	2	1	2	1	2	2	4	TRUE	Shared Core
OG0001349	2	1	1	2	1	1	1	3	2	2	2	2	3	2	2	3	TRUE	Shared Core
OG0001350	1	1	2	2	1	1	1	2	1	2	2	2	3	2	2	4	FALSE	Shared Core
OG0001351	2	2	2	2	2	2	2	2	2	2	2	3	2	3	2	3	FALSE	Shared Core
OG0001352	2	3	1	1	2	2	1	2	2	2	3	2	2	2	2	3	TRUE	Shared Core
OG0001353	2	2	1	1	1	2	2	2	2	2	2	2	3	2	2	2	TRUE	Shared Core
OG0001354	1	2	2	2	2	2	1	2	2	1	3	5	2	1	2	2	FALSE	Shared Core
OG0001355	2	1	2	1	1	2	2	2	2	2	2	2	2	2	2	2	TRUE	Shared Core
OG0001356	1	1	1	1	2	1	2	2	3	3	3	2	3	2	2	2	FALSE	Shared Core
OG0001357	1	2	2	2	2	2	2	2	3	2	2	2	2	2	2	2	TRUE	Shared Core
OG0001358	1	1	1	1	1	1	1	3	4	3	3	3	3	2	3	1	TRUE	Shared Core
OG0001359	2	1	2	2	1	2	2	2	4	1	1	3	1	3	2	3	TRUE	Shared Core
OG0001360	3	1	1	1	1	1	3	2	3	2	2	2	2	2	2	2	TRUE	Shared Core
OG0001361	2	2	2	2	1	1	2	2	4	2	2	2	2	2	2	2	TRUE	Shared Core
OG0001362	2	2	1	1	1	2	1	2	2	2	3	1	2	1	2	2	TRUE	Shared Core
OG0001363	0	1	0	0	0	1	0	1	4	2	3	2	1	2	2	4	TRUE	Cni-unique core
OG0001364	0	1	1	1	1	1	1	0	1	1	1	0	1	0	1	1	TRUE	Dispensable
OG0001365	0	0	0	0	0	0	0	0	0	0	0	0	0	0	0	0	TRUE	Cni-specific
OG0001366	0	0	0	0	0	0	0	1	8	2	1	1	3	1	2	4	TRUE	Cni-specific
OG0001367	0	0	1	1	0	1	0	3	3	3	3	4	3	3	3	3	TRUE	Cni-unique core
OG0001368	0	0	0	0	0	0	0	0	0	0	0	0	0	0	0	0	TRUE	Cni-specific
OG0001369	0	0	0	0	0	0	0	0	0	0	0	0	0	0	0	0	TRUE	Cni-specific
OG0001370	0	0	0	0	0	0	0	3	6	2	0	1	3	2	6	4	TRUE	Cni-specific
OG0001371	0	0	3	1	2	0	2	2	2	2	1	3	4	2	2	2	TRUE	Cni-unique core
OG0001372	0	1	1	1	1	1	1	3	1	3	1	2	1	2	1	2	TRUE	Cni-unique core
OG0001373	0	0	0	0	0	0	0	0	0	0	0	0	0	0	0	0	TRUE	Cni-specific
OG0001374	0	3	0	0	0	0	0	1	4	3	1	2	2	3	1	2	TRUE	Cni-unique core
OG0001375	0	0	0	0	0	0	0	4	4	4	1	3	4	5	3	4	TRUE	Cni-specific
OG0001376	0	2	3	1	1	1	2	2	1	2	2	2	1	2	2	2	TRUE	Cni-unique core
OG0001377	0	1	1	2	1	1	3	2	8	1	0	1	3	0	7	1	FALSE	Dispensable
OG0001378	0	0	0	0	0	0	0	4	6	8	3	1	4	1	4	2	FALSE	Cni-specific
OG0001379	0	0	0	0	0	0	0	1	7	5	4	1	1	7	5	4	FALSE	Cni-specific
OG0001380	0	0	0	1	0	0	0	4	3	7	7	3	6	0	3	1	FALSE	Dispensable
OG0001381	0	0	0	0	0	0	0	4	3	4	4	4	4	4	4	4	FALSE	Cni-specific
OG0001382	0	0	0	0	0	0	0	5	4	7	3	3	2	4	4	3	FALSE	Cni-specific
OG0001383	0	0	0	0	0	0	0	0	0	0	0	0	0	0	0	0	FALSE	Cni-specific
OG0001384	1	1	2	1	1	2	1	2	4	2	2	2	2	2	3	6	FALSE	Shared Core
OG0001385	2	2	2	2	2	2	2	2	1	2	2	2	2	1	2	2	TRUE	Shared Core
OG0001386	2	2	1	1	1	2	2	2	2	2	2	2	2	2	2	2	TRUE	Shared Core
OG0001387	2	2	2	2	2	2	2	2	2	2	2	2	2	2	2	2	TRUE	Shared Core
OG0001388	2	2	2	2	2	2	2	2	2	2	2	2	1	2	2	2	TRUE	Shared Core
OG0001389	1	1	1	1	1	1	1	3	2	2	3	3	3	3	3	3	TRUE	Shared Core
OG0001390	2	2	1	1	1	1	1	2	2	2	2	2	2	2	2	2	TRUE	Shared Core
OG0001391	1	2	1	1	1	1	1	3	3	3	2	1	1	3	3	3	TRUE	Shared Core
OG0001392	1	0	0	0	0	0	0	4	3	4	3	3	3	3	4	3	TRUE	Cni-unique core
OG0001393	2	2	2	2	2	2	2	1	1	2	2	2	2	2	2	2	TRUE	Shared Core
OG0001394	2	0	4	3	3	2	1	2	4	1	5	2	0	2	2	1	FALSE	Dispensable
OG0001395	2	1	1	1	1	1	1	2	2	2	2	2	2	2	2	2	TRUE	Shared Core
OG0001396	2	1	2	1	1	2	2	2	2	2	2	2	2	2	2	2	TRUE	Shared Core
OG0001397	2	1	1	1	1	2	2	2	2	2	2	2	2	2	2	2	TRUE	Shared Core
OG0001398	2	1	2	2	2	1	2	2	2	2	2	2	2	2	3	2	TRUE	Shared Core
OG0001399	3	2	2	2	2	2	2	1	2	3	1	1	2	2	2	2	TRUE	Shared Core
OG0001400	2	2	2	2	2	2	2	2	2	2	2	2	2	2	2	2	TRUE	Shared Core
OG0001401	2	2	2	2	2	2	2	2	1	2	4	3	2	2	2	2	FALSE	Shared Core
OG0001402	5	6	3	1	1	4	6	1	1	0	0	1	2	1	1	1	FALSE	Cbr-unique core
OG0001403	1	1	0	1	1	1	1	3	3	3	3	2	4	3	4	3	FALSE	Cni-unique core
OG0001404	1	1	1	1	2	1	1	2	5	2	3	2	4	4	2	2	FALSE	Shared Core
OG0001405	2	2	2	2	2	2	1	2	1	2	1	2	2	2	1	2	TRUE	Shared Core
OG0001406	2	2	1	2	2	3	2	1	3	2	3	2	2	2	3	2	FALSE	Shared Core
OG0001407	1	2	1	1	1	1	1	2	3	3	3	2	1	3	3	5	FALSE	Shared Core
OG0001408	1	3	3	2	2	3	2	2	1	1	1	1	1	3	2	1	TRUE	Shared Core
OG0001409	2	2	2	2	2	2	2	2	2	2	2	2	2	1	2	2	TRUE	Shared Core
OG0001410	1	1	1	1	1	1	1	4	2	2	3	4	4	3	2	3	FALSE	Shared Core
OG0001411	2	3	2	2	1	3	3	2	2	2	1	2	1	1	2	1	TRUE	Shared Core
OG0001412	2	1	2	1	2	2	1	2	2	2	2	2	2	2	2	2	TRUE	Shared Core
OG0001413	1	0	2	1	1	1	2	4	3	2	4	5	1	2	3	2	FALSE	Cni-unique core
OG0001414	1	2	2	2	2	1	2	2	2	2	3	1	2	2	3	2	TRUE	Shared Core
OG0001415	2	1	2	3	2	3	2	2	2	1	2	2	2	2	2	2	TRUE	Shared Core
OG0001416	1	1	1	1	1	1	2	3	2	4	4	1	2	4	1	3	TRUE	Shared Core
OG0001417	5	5	1	1	1	3	1	2	2	1	2	2	1	2	3	2	FALSE	Shared Core
OG0001418	1	1	1	1	1	0	0	3	3	3	3	3	3	2	3	3	TRUE	Cni-unique core
OG0001419	1	1	1	1	1	1	1	2	3	2	2	3	2	2	2	2	TRUE	Shared Core
OG0001420	1	2	3	3	2	2	1	1	0	0	2	0	0	1	1	0	TRUE	Cbr-unique core
OG0001421	2	2	2	2	1	2	2	2	2	2	2	1	2	2	2	1	TRUE	Shared Core
OG0001422	1	2	1	1	1	2	2	2	2	2	2	2	2	2	2	2	TRUE	Shared Core
OG0001423	1	1	1	1	1	1	1	1	5	1	4	3	1	2	3	3	TRUE	Shared Core
OG0001424	1	1	1	1	1	1	1	4	2	3	2	3	1	6	4	2	FALSE	Shared Core
OG0001425	2	2	2	2	2	2	2	1	2	2	1	1	2	1	2	2	TRUE	Shared Core
OG0001426	1	1	1	1	1	1	1	3	3	2	2	3	4	2	3	2	TRUE	Shared Core
OG0001427	1	0	1	1	0	1	1	3	3	3	2	4	3	5	3	3	FALSE	Cni-unique core
OG0001428	2	2	3	3	3	3	3	1	1	1	2	1	1	1	3	1	TRUE	Shared Core
OG0001429	2	2	2	2	3	2	2	2	2	2	1	1	1	2	1	2	TRUE	Shared Core
OG0001430	2	1	2	2	2	2	2	2	3	2	3	2	2	1	1	5	FALSE	Shared Core
OG0001431	1	1	1	1	1	1	1	2	2	2	4	5	4	1	2	5	FALSE	Shared Core
OG0001432	2	2	2	2	2	2	2	2	2	2	2	2	2	2	2	2	TRUE	Shared Core
OG0001433	2	2	2	1	2	2	1	2	4	2	2	2	1	3	2	2	FALSE	Shared Core
OG0001434	1	2	1	1	1	2	1	2	2	2	1	1	1	1	2	2	TRUE	Shared Core
OG0001435	2	2	2	2	2	2	2	2	2	2	2	2	2	2	2	2	TRUE	Shared Core
OG0001436	1	1	1	1	1	1	1	2	3	2	2	2	3	3	2	5	TRUE	Shared Core
OG0001437	1	1	2	2	2	1	1	1	1	2	1	1	2	2	2	4	TRUE	Shared Core
OG0001438	2	2	2	2	2	2	2	2	2	2	2	1	2	2	2	2	TRUE	Shared Core
OG0001439	1	1	1	1	1	1	0	3	3	3	2	6	1	2	5	3	FALSE	Cni-unique core
OG0001440	2	2	2	1	1	2	1	2	2	2	2	2	2	2	2	2	TRUE	Shared Core
OG0001441	1	1	1	2	1	1	2	2	2	3	2	2	2	2	2	2	TRUE	Shared Core
OG0001442	1	1	2	2	2	1	2	2	2	2	2	2	3	3	3	2	TRUE	Shared Core
OG0001443	1	1	1	1	1	1	1	1	1	1	1	1	1	1	1	1	TRUE	Shared Core
OG0001444	2	2	3	2	2	2	1	3	3	1	2	2	4	3	0	2	FALSE	Cbr-unique core
OG0001445	2	2	1	2	2	2	2	2	2	2	2	2	2	2	2	2	TRUE	Shared Core
OG0001446	2	1	2	2	2	2	1	2	1	1	2	2	2	2	1	1	TRUE	Shared Core
OG0001447	1	1	1	1	1	1	1	3	4	2	2	3	2	3	3	4	FALSE	Shared Core
OG0001448	1	1	1	1	1	1	1	2	2	1	1	2	1	1	1	4	TRUE	Shared Core
OG0001449	2	2	1	1	1	1	1	2	2	2	2	2	1	2	2	2	TRUE	Shared Core
OG0001450	1	0	1	2	1	2	2	2	3	2	2	2	2	2	0	4	TRUE	Dispensable
OG0001451	1	2	1	1	2	2	2	2	2	2	2	2	2	2	2	4	TRUE	Shared Core
OG0001452	1	1	1	1	1	1	1	2	2	2	2	3	2	3	3	2	TRUE	Shared Core
OG0001453	1	2	2	2	1	2	1	1	3	2	2	3	2	1	2	1	TRUE	Shared Core
OG0001454	1	1	2	1	1	0	1	2	2	2	2	2	2	2	2	2	TRUE	Cni-unique core
OG0001455	2	2	2	2	2	2	2	2	2	1	2	2	2	2	2	2	TRUE	Shared Core
OG0001456	1	1	1	1	1	1	1	6	2	2	1	1	2	4	3	4	FALSE	Shared Core
OG0001457	2	2	2	2	2	2	2	2	4	2	1	2	2	2	2	2	FALSE	Shared Core
OG0001458	1	1	1	1	1	1	1	3	1	3	3	4	4	2	3	4	FALSE	Shared Core
OG0001459	2	2	2	2	2	2	1	2	2	2	3	2	2	2	2	2	TRUE	Shared Core
OG0001460	2	2	2	2	1	2	2	2	2	2	2	2	2	2	2	2	TRUE	Shared Core
OG0001461	0	1	1	1	1	1	1	2	2	2	2	2	3	3	2	2	TRUE	Cni-unique core
OG0001462	0	0	0	0	0	0	0	1	6	2	3	2	4	2	2	9	TRUE	Cni-specific
OG0001463	0	2	2	2	1	1	1	4	3	1	3	4	3	0	0	1	TRUE	Dispensable
OG0001464	0	1	2	1	7	1	8	1	1	1	2	1	2	3	2	1	FALSE	Cni-unique core
OG0001465	0	1	3	2	3	1	1	4	3	1	1	3	3	3	2	3	FALSE	Cni-unique core
OG0001466	0	0	0	0	0	0	0	5	4	3	7	5	3	1	3	3	FALSE	Cni-specific
OG0001467	0	0	0	0	0	0	0	3	4	3	7	3	4	2	6	2	FALSE	Cni-specific
OG0001468	2	2	2	2	2	2	2	2	1	2	2	1	2	1	2	2	TRUE	Shared Core
OG0001469	1	1	1	1	1	1	1	2	2	2	2	3	2	3	2	3	TRUE	Shared Core
OG0001470	1	1	1	1	1	1	1	2	2	2	2	2	2	2	2	2	TRUE	Shared Core
OG0001471	2	2	1	1	1	2	1	2	2	2	2	2	2	2	2	2	TRUE	Shared Core
OG0001472	2	2	1	2	1	4	1	1	2	1	2	2	2	2	2	2	TRUE	Shared Core
OG0001473	2	2	1	2	2	2	1	2	2	2	2	2	2	2	2	2	TRUE	Shared Core
OG0001474	2	2	1	2	2	2	3	2	2	2	2	2	0	2	2	2	TRUE	Cbr-unique core
OG0001475	2	1	1	1	1	1	1	2	2	2	4	3	3	2	2	2	TRUE	Shared Core
OG0001476	2	2	2	2	2	2	2	3	2	2	2	2	1	2	2	2	FALSE	Shared Core
OG0001477	1	1	1	1	1	1	1	5	1	2	2	2	2	2	2	2	TRUE	Shared Core
OG0001478	1	1	1	1	1	1	1	3	3	2	2	3	3	2	3	2	TRUE	Shared Core
OG0001479	2	2	2	3	2	2	1	2	2	2	2	2	2	2	2	2	FALSE	Shared Core
OG0001480	2	1	1	1	1	1	1	2	2	2	2	2	2	2	2	2	TRUE	Shared Core
OG0001481	1	1	1	1	3	1	2	2	2	2	2	2	2	2	2	2	TRUE	Shared Core
OG0001482	1	1	1	1	1	1	1	2	2	1	2	3	2	2	2	4	TRUE	Shared Core
OG0001483	1	2	1	1	2	2	2	2	2	2	4	2	2	2	1	3	FALSE	Shared Core
OG0001484	2	2	2	2	1	2	2	1	2	2	2	2	2	1	1	2	TRUE	Shared Core
OG0001485	1	1	1	1	1	1	1	1	3	1	3	3	3	3	1	1	TRUE	Shared Core
OG0001486	1	1	1	1	1	1	1	3	3	3	3	2	3	2	3	3	FALSE	Shared Core
OG0001487	1	1	1	1	1	1	1	2	2	2	3	3	3	3	3	3	TRUE	Shared Core
OG0001488	2	2	2	2	2	2	2	4	3	1	0	1	1	3	4	2	FALSE	Cbr-unique core
OG0001489	1	2	3	2	2	2	1	2	2	2	2	2	2	2	2	2	FALSE	Shared Core
OG0001490	3	2	2	2	2	3	2	1	1	2	3	5	1	1	1	2	FALSE	Shared Core
OG0001491	4	6	1	1	1	3	3	1	2	1	2	2	1	1	1	1	FALSE	Shared Core
OG0001492	1	1	1	1	1	1	1	2	4	2	4	2	2	2	2	3	TRUE	Shared Core
OG0001493	2	2	2	2	2	1	1	2	0	1	2	1	1	1	1	1	TRUE	Cbr-unique core
OG0001494	2	2	1	1	2	2	1	2	3	2	2	2	2	2	2	2	TRUE	Shared Core
OG0001495	2	2	1	2	1	2	1	1	3	3	1	3	3	4	1	3	FALSE	Shared Core
OG0001496	1	1	1	1	1	1	1	2	4	2	2	3	3	2	3	2	TRUE	Shared Core
OG0001497	1	1	1	1	1	1	1	2	2	2	2	2	2	2	2	2	TRUE	Shared Core
OG0001498	1	1	1	1	1	1	1	3	4	3	3	2	2	2	2	5	FALSE	Shared Core
OG0001499	2	2	2	2	2	2	2	2	2	2	2	2	2	2	2	2	FALSE	Shared Core
OG0001500	2	1	2	2	2	2	2	2	2	2	4	2	2	1	1	4	FALSE	Shared Core
OG0001501	3	3	2	2	2	3	2	2	1	3	1	1	1	1	1	3	FALSE	Shared Core
OG0001502	1	1	1	1	1	1	1	2	2	2	4	2	5	2	3	2	TRUE	Shared Core
OG0001503	2	2	2	2	2	2	2	2	2	2	2	2	3	2	2	2	FALSE	Shared Core
OG0001504	1	4	12	3	3	4	6	0	0	0	0	0	0	0	0	0	FALSE	Cbr-specific
OG0001505	2	1	2	2	1	1	1	2	2	2	2	2	2	2	2	2	TRUE	Shared Core
OG0001506	1	2	4	4	2	2	5	1	2	2	1	2	1	1	1	2	FALSE	Shared Core
OG0001507	2	2	2	2	3	2	2	2	2	2	3	2	1	2	2	2	FALSE	Shared Core
OG0001508	2	1	2	2	2	1	2	2	2	2	2	2	2	2	2	2	TRUE	Shared Core
OG0001509	1	1	0	0	0	1	1	4	2	3	4	1	1	2	0	6	TRUE	Dispensable
OG0001510	1	1	1	1	1	1	1	2	2	2	3	1	1	2	2	2	TRUE	Shared Core
OG0001511	1	1	2	2	1	1	1	2	2	2	2	2	2	2	2	3	TRUE	Shared Core
OG0001512	2	2	2	2	2	2	2	2	2	2	2	1	2	2	2	2	FALSE	Shared Core
OG0001513	2	2	1	1	1	2	1	2	2	2	2	2	2	2	2	2	TRUE	Shared Core
OG0001514	2	2	2	2	2	2	2	2	1	2	2	2	3	1	1	3	TRUE	Shared Core
OG0001515	1	2	1	1	1	2	1	2	2	2	2	2	2	3	2	3	TRUE	Shared Core
OG0001516	2	2	2	2	2	2	2	2	2	1	1	2	2	3	2	3	FALSE	Shared Core
OG0001517	1	2	2	2	2	2	2	2	2	2	2	2	2	2	1	2	TRUE	Shared Core
OG0001518	1	1	2	2	2	1	2	2	2	2	2	3	2	2	2	2	TRUE	Shared Core
OG0001519	2	2	2	3	2	2	2	2	2	2	2	2	2	1	1	2	TRUE	Shared Core
OG0001520	2	2	2	2	2	2	2	2	2	3	2	1	2	1	0	1	TRUE	Cbr-unique core
OG0001521	1	2	2	2	2	1	2	0	1	2	1	1	2	1	2	2	TRUE	Cbr-unique core
OG0001522	1	1	1	1	1	1	1	2	1	2	2	2	2	1	2	2	TRUE	Shared Core
OG0001523	1	1	1	2	1	1	1	2	4	3	2	3	2	2	3	3	FALSE	Shared Core
OG0001524	1	1	2	2	1	1	1	1	3	2	2	2	2	2	2	2	TRUE	Shared Core
OG0001525	2	2	2	3	3	3	4	1	2	2	3	0	1	1	1	0	TRUE	Cbr-unique core
OG0001526	1	2	2	2	2	1	1	2	1	2	2	2	2	2	2	2	TRUE	Shared Core
OG0001527	2	1	1	1	1	1	1	3	2	2	2	3	2	2	2	2	TRUE	Shared Core
OG0001528	0	0	0	0	0	0	1	3	3	3	3	3	4	2	4	2	TRUE	Cni-unique core
OG0001529	0	1	0	0	0	0	0	2	2	2	1	1	4	2	2	1	TRUE	Cni-unique core
OG0001530	0	0	0	0	0	0	0	1	3	4	3	1	1	4	5	3	TRUE	Cni-specific
OG0001531	0	0	0	0	0	0	0	4	2	3	2	2	4	2	8	3	FALSE	Cni-specific
OG0001532	0	0	0	0	0	0	0	4	2	3	3	4	1	2	4	6	TRUE	Cni-specific
OG0001533	0	0	0	0	0	0	0	4	4	5	2	2	3	4	1	1	TRUE	Cni-specific
OG0001534	0	2	2	2	2	2	2	3	1	3	2	2	4	1	2	2	FALSE	Cni-unique core
OG0001535	0	1	1	1	1	1	0	2	5	1	1	4	2	4	1	5	TRUE	Cni-unique core
OG0001536	0	0	0	0	0	0	0	0	0	0	0	0	0	0	0	0	FALSE	Cni-specific
OG0001537	0	1	3	1	0	5	7	0	1	8	5	0	0	0	0	2	FALSE	Dispensable
OG0001538	0	0	0	0	0	0	0	5	10	2	4	1	0	5	2	4	FALSE	Cni-specific
OG0001539	0	0	0	0	0	0	0	5	11	0	0	1	6	5	1	4	FALSE	Cni-specific
OG0001540	2	2	1	1	2	2	2	2	3	2	2	1	1	1	2	2	TRUE	Shared Core
OG0001541	1	1	2	1	1	1	1	2	5	2	3	2	2	2	2	2	TRUE	Shared Core
OG0001542	1	1	1	1	1	1	1	2	2	3	2	3	2	2	2	3	TRUE	Shared Core
OG0001543	2	2	2	1	1	2	1	2	2	2	2	2	2	2	2	2	TRUE	Shared Core
OG0001544	3	1	1	1	1	1	2	2	2	2	2	2	2	2	2	2	TRUE	Shared Core
OG0001545	1	2	2	2	2	1	2	2	2	2	2	2	2	2	2	2	TRUE	Shared Core
OG0001546	1	1	1	1	1	1	1	2	1	2	2	1	1	2	2	2	TRUE	Shared Core
OG0001547	1	1	1	1	1	1	1	1	1	1	1	1	1	1	1	1	TRUE	Shared Core
OG0001548	1	1	1	1	1	1	1	2	3	1	3	2	3	3	3	1	TRUE	Shared Core
OG0001549	1	1	1	1	2	2	1	2	2	2	2	3	2	2	2	2	TRUE	Shared Core
OG0001550	1	1	1	1	1	1	1	3	3	3	2	3	2	1	2	2	TRUE	Shared Core
OG0001551	3	3	1	1	1	1	1	2	2	2	2	2	4	2	2	2	FALSE	Shared Core
OG0001552	1	1	1	1	1	1	1	2	3	2	2	3	3	2	3	2	TRUE	Shared Core
OG0001553	1	1	1	1	1	1	1	1	1	1	1	1	1	1	1	1	TRUE	Shared Core
OG0001554	1	1	1	1	1	1	1	2	3	2	2	2	3	2	2	2	TRUE	Shared Core
OG0001555	1	2	1	1	1	1	1	2	2	2	4	2	2	2	2	2	TRUE	Shared Core
OG0001556	2	2	2	2	2	2	2	2	2	2	2	2	2	2	2	2	FALSE	Shared Core
OG0001557	2	1	1	1	1	1	1	2	2	2	2	2	2	2	2	2	TRUE	Shared Core
OG0001558	1	1	2	2	1	1	2	2	3	1	1	3	3	2	2	1	TRUE	Shared Core
OG0001559	2	1	1	0	1	2	2	1	2	2	3	2	2	2	2	2	TRUE	Cni-unique core
OG0001560	1	0	0	1	0	1	1	3	5	3	2	2	3	3	4	3	FALSE	Cni-unique core
OG0001561	1	1	1	1	1	1	1	2	3	3	3	3	3	2	3	3	FALSE	Shared Core
OG0001562	2	2	2	2	2	2	2	2	1	2	3	2	1	2	3	2	FALSE	Shared Core
OG0001563	2	1	2	2	1	2	1	2	2	3	2	3	2	1	3	2	FALSE	Shared Core
OG0001564	1	1	1	1	1	1	1	2	2	2	2	2	3	3	2	3	TRUE	Shared Core
OG0001565	1	1	1	1	1	1	1	1	2	2	3	4	1	2	4	2	TRUE	Shared Core
OG0001566	1	1	1	1	1	1	1	2	2	2	4	2	3	1	2	3	TRUE	Shared Core
OG0001567	1	2	2	2	2	2	2	2	1	1	2	1	1	1	2	2	TRUE	Shared Core
OG0001568	1	1	1	1	1	1	1	2	1	1	1	1	1	2	2	2	TRUE	Shared Core
OG0001569	2	2	2	2	2	2	1	1	1	1	2	1	1	1	1	2	TRUE	Shared Core
OG0001570	1	1	2	2	1	1	1	2	5	2	1	1	2	2	2	1	TRUE	Shared Core
OG0001571	2	1	1	1	1	1	1	2	2	2	2	2	2	2	2	2	TRUE	Shared Core
OG0001572	1	1	2	2	2	1	2	0	2	2	5	2	2	4	1	3	FALSE	Cbr-unique core
OG0001573	1	1	1	1	2	1	1	2	1	2	3	2	6	2	2	2	TRUE	Shared Core
OG0001574	2	3	2	2	2	3	3	1	3	1	2	1	1	2	3	1	FALSE	Shared Core
OG0001575	1	1	1	1	1	1	1	3	1	3	3	3	3	4	2	3	FALSE	Shared Core
OG0001576	1	1	1	1	1	1	1	3	4	3	3	3	2	2	2	3	FALSE	Shared Core
OG0001577	1	1	1	1	1	1	2	2	2	2	2	2	2	2	2	2	TRUE	Shared Core
OG0001578	1	1	2	2	2	1	2	2	1	2	1	2	2	2	2	2	TRUE	Shared Core
OG0001579	2	1	2	2	3	2	2	1	2	2	2	3	2	2	2	1	FALSE	Shared Core
OG0001580	1	1	1	2	3	1	1	2	2	2	3	4	1	2	2	4	FALSE	Shared Core
OG0001581	1	1	3	3	2	1	2	1	2	2	2	2	2	2	2	2	TRUE	Shared Core
OG0001582	1	1	1	1	1	1	1	2	2	2	3	2	2	2	2	2	TRUE	Shared Core
OG0001583	2	2	2	2	2	2	4	1	1	1	1	2	1	2	2	2	TRUE	Shared Core
OG0001584	1	2	2	2	2	1	2	2	1	3	1	1	1	4	2	1	TRUE	Shared Core
OG0001585	1	1	1	1	1	0	1	2	2	2	2	2	3	1	2	6	TRUE	Cni-unique core
OG0001586	1	1	1	1	1	1	1	2	2	2	2	2	2	2	2	3	TRUE	Shared Core
OG0001587	1	0	0	0	0	0	0	3	5	2	5	7	3	2	1	2	FALSE	Cni-unique core
OG0001588	1	1	1	1	1	1	1	2	3	2	2	3	4	3	2	3	FALSE	Shared Core
OG0001589	1	1	2	2	2	2	1	1	2	3	3	2	3	3	2	2	FALSE	Shared Core
OG0001590	2	1	1	1	1	1	1	2	2	2	2	2	1	2	2	2	TRUE	Shared Core
OG0001591	2	2	2	2	2	2	2	2	1	2	2	2	1	2	2	1	TRUE	Shared Core
OG0001592	2	2	1	1	3	2	2	1	3	3	2	1	1	0	2	3	TRUE	Cbr-unique core
OG0001593	1	2	2	2	2	2	2	2	0	1	3	1	2	3	2	2	TRUE	Cbr-unique core
OG0001594	1	1	2	2	2	1	1	1	2	1	1	2	2	2	1	2	TRUE	Shared Core
OG0001595	2	1	1	1	1	1	5	1	3	1	2	2	2	2	1	4	TRUE	Shared Core
OG0001596	1	1	2	1	1	1	1	1	5	1	1	5	1	4	1	2	TRUE	Shared Core
OG0001597	1	2	2	2	2	2	2	2	2	2	2	2	2	2	2	2	FALSE	Shared Core
OG0001598	1	2	2	2	1	2	2	1	2	1	2	1	2	1	2	3	TRUE	Shared Core
OG0001599	1	2	0	1	2	1	0	3	2	2	2	4	2	2	3	2	TRUE	Cni-unique core
OG0001600	1	2	1	1	1	1	2	2	3	2	2	3	2	2	1	2	TRUE	Shared Core
OG0001601	1	2	2	2	2	2	2	0	4	1	1	2	1	2	2	1	TRUE	Cbr-unique core
OG0001602	2	2	1	1	3	4	3	2	2	2	2	1	0	2	1	2	FALSE	Cbr-unique core
OG0001603	2	2	2	2	2	2	1	2	2	2	2	2	2	2	2	2	FALSE	Shared Core
OG0001604	1	2	2	2	2	1	2	2	2	2	2	3	3	2	1	3	FALSE	Shared Core
OG0001605	1	1	1	1	2	1	1	2	2	2	2	2	2	2	2	2	TRUE	Shared Core
OG0001606	0	0	0	0	0	0	0	0	0	0	0	0	0	0	0	0	TRUE	Cni-specific
OG0001607	0	0	0	0	0	0	0	4	5	4	0	1	3	4	0	6	TRUE	Cni-specific
OG0001608	0	0	0	0	0	0	0	0	0	0	0	0	0	0	0	0	FALSE	Cni-specific
OG0001609	0	1	0	1	1	1	1	2	5	2	3	2	2	2	2	3	TRUE	Cni-unique core
OG0001610	0	2	2	1	2	2	2	3	2	2	1	2	1	1	2	2	TRUE	Cni-unique core
OG0001611	0	0	1	1	1	0	1	2	4	2	4	2	3	2	2	2	TRUE	Cni-unique core
OG0001612	0	0	0	0	0	0	0	3	5	5	7	0	3	4	2	1	TRUE	Cni-specific
OG0001613	0	0	0	0	0	0	0	2	3	4	3	1	9	4	3	2	FALSE	Cni-specific
OG0001614	0	0	0	0	0	0	0	4	3	4	3	4	2	3	4	4	FALSE	Cni-specific
OG0001615	0	1	1	1	1	0	1	4	4	4	1	2	4	1	5	2	FALSE	Cni-unique core
OG0001616	0	1	2	2	1	1	1	2	3	3	4	3	0	4	2	3	FALSE	Dispensable
OG0001617	0	0	0	0	1	1	0	7	2	5	4	1	0	1	6	4	FALSE	Dispensable
OG0001618	0	0	0	0	0	0	0	4	5	3	6	6	5	0	3	0	FALSE	Cni-specific
OG0001619	0	0	0	0	0	0	0	1	6	1	5	1	4	1	8	5	FALSE	Cni-specific
OG0001620	0	0	0	0	0	0	0	3	4	3	4	4	3	3	4	4	FALSE	Cni-specific
OG0001621	0	0	2	3	1	0	0	3	2	2	4	3	3	2	4	3	FALSE	Cni-unique core
OG0001622	0	0	0	0	0	0	0	1	4	1	6	4	8	0	1	7	FALSE	Cni-specific
OG0001623	2	2	1	2	2	2	1	1	3	1	1	2	4	1	2	2	TRUE	Shared Core
OG0001624	1	1	1	1	1	1	1	4	2	2	3	2	2	3	2	2	TRUE	Shared Core
OG0001625	1	1	1	1	2	1	2	2	2	2	2	2	2	2	2	2	TRUE	Shared Core
OG0001626	1	2	1	1	1	2	1	2	3	2	2	2	2	2	2	2	TRUE	Shared Core
OG0001627	1	1	1	1	1	1	1	2	2	2	2	3	2	2	2	2	TRUE	Shared Core
OG0001628	1	1	1	1	1	1	1	2	3	2	2	2	2	2	2	3	TRUE	Shared Core
OG0001629	1	1	1	2	1	1	1	2	2	2	2	3	2	2	2	2	TRUE	Shared Core
OG0001630	1	1	1	1	1	1	1	3	1	2	3	3	3	3	3	3	FALSE	Shared Core
OG0001631	1	1	1	1	1	1	1	2	2	2	3	2	2	3	4	4	FALSE	Shared Core
OG0001632	2	1	2	1	2	1	1	2	2	2	2	2	2	2	2	2	TRUE	Shared Core
OG0001633	2	2	2	2	1	2	2	0	4	1	2	2	0	0	1	1	FALSE	Cbr-unique core
OG0001634	2	2	2	2	2	2	2	1	2	3	1	1	2	2	2	1	FALSE	Shared Core
OG0001635	1	1	1	1	1	2	1	2	2	2	2	2	2	2	2	2	TRUE	Shared Core
OG0001636	1	1	2	2	1	1	2	2	2	2	2	2	2	2	2	2	TRUE	Shared Core
OG0001637	2	1	2	2	1	2	2	2	2	2	2	1	2	2	2	2	TRUE	Shared Core
OG0001638	1	1	2	2	2	0	2	2	2	2	2	2	2	2	2	5	FALSE	Cni-unique core
OG0001639	1	1	1	1	1	1	1	3	2	2	2	2	2	2	3	3	TRUE	Shared Core
OG0001640	1	0	0	0	0	0	0	1	0	4	1	2	2	0	1	5	TRUE	Dispensable
OG0001641	1	0	1	0	1	1	1	3	2	4	3	2	4	4	1	3	FALSE	Cni-unique core
OG0001642	1	2	2	2	2	1	2	1	2	1	1	2	0	5	1	1	TRUE	Cbr-unique core
OG0001643	1	1	1	1	1	1	1	3	3	3	3	2	2	3	2	3	FALSE	Shared Core
OG0001644	2	2	2	2	2	2	1	2	2	2	2	2	2	2	2	2	FALSE	Shared Core
OG0001645	1	2	1	1	2	2	2	1	2	1	3	2	1	4	2	1	FALSE	Shared Core
OG0001646	1	2	2	1	1	1	1	1	1	1	1	1	6	2	1	4	TRUE	Shared Core
OG0001647	1	1	1	1	1	1	1	2	1	2	3	3	2	2	1	3	TRUE	Shared Core
OG0001648	1	1	1	1	1	1	1	2	2	2	3	2	2	2	2	2	TRUE	Shared Core
OG0001649	1	1	2	2	1	1	1	2	1	2	2	1	1	2	6	1	TRUE	Shared Core
OG0001650	1	1	1	1	1	1	1	2	2	2	3	2	2	2	2	2	TRUE	Shared Core
OG0001651	2	2	2	2	1	2	2	2	1	2	1	1	1	1	2	1	TRUE	Shared Core
OG0001652	1	1	1	1	1	1	1	2	2	2	2	1	2	2	2	2	FALSE	Shared Core
OG0001653	1	1	1	1	1	1	1	1	2	3	3	4	1	4	2	1	TRUE	Shared Core
OG0001654	1	1	0	1	1	1	1	2	2	2	2	2	2	2	2	3	TRUE	Cni-unique core
OG0001655	1	0	1	1	2	2	2	2	2	2	2	2	2	2	2	2	TRUE	Cni-unique core
OG0001656	1	1	1	1	1	1	2	2	2	2	2	2	2	2	2	2	TRUE	Shared Core
OG0001657	2	1	2	2	2	2	2	1	2	2	2	2	1	3	2	3	FALSE	Shared Core
OG0001658	1	2	1	1	1	2	1	2	2	4	4	1	2	2	3	2	FALSE	Shared Core
OG0001659	2	2	3	2	2	2	2	2	2	2	1	2	3	2	1	1	FALSE	Shared Core
OG0001660	2	1	1	1	1	1	1	2	2	2	2	2	2	2	2	2	TRUE	Shared Core
OG0001661	2	2	2	2	2	2	2	2	2	2	2	2	2	1	2	2	FALSE	Shared Core
OG0001662	1	1	1	1	1	3	2	3	2	4	3	2	2	1	2	2	FALSE	Shared Core
OG0001663	1	1	1	1	1	1	1	3	1	4	2	3	3	2	2	4	FALSE	Shared Core
OG0001664	2	2	2	2	2	2	2	2	2	2	2	2	2	2	2	1	FALSE	Shared Core
OG0001665	1	1	2	2	2	1	2	1	2	2	3	2	1	2	2	2	TRUE	Shared Core
OG0001666	2	2	2	2	2	2	2	2	2	2	2	2	1	2	1	2	FALSE	Shared Core
OG0001667	1	1	1	1	1	1	1	3	3	2	3	2	3	2	4	2	FALSE	Shared Core
OG0001668	1	1	1	1	1	1	1	3	4	2	2	3	2	3	3	2	FALSE	Shared Core
OG0001669	1	1	2	1	2	1	1	2	1	2	4	1	1	2	3	2	TRUE	Shared Core
OG0001670	2	2	1	1	1	2	1	2	2	2	1	4	3	2	1	2	FALSE	Shared Core
OG0001671	2	2	2	2	2	2	2	2	1	1	1	1	4	1	3	1	FALSE	Shared Core
OG0001672	1	1	1	1	1	1	1	3	2	3	3	3	2	3	3	2	FALSE	Shared Core
OG0001673	2	1	1	1	1	1	1	2	2	2	2	2	2	2	2	2	TRUE	Shared Core
OG0001674	1	1	1	1	1	1	1	3	1	1	2	1	2	2	3	4	TRUE	Shared Core
OG0001675	1	1	1	1	1	1	1	2	3	2	3	3	2	2	3	2	TRUE	Shared Core
OG0001676	1	2	1	1	2	3	3	1	2	2	2	2	2	2	1	1	TRUE	Shared Core
OG0001677	1	1	1	1	1	1	1	2	2	2	2	2	2	2	2	2	TRUE	Shared Core
OG0001678	2	2	1	2	1	2	1	2	2	2	2	2	2	2	2	2	TRUE	Shared Core
OG0001679	1	1	1	1	1	1	1	1	3	2	3	2	3	3	3	2	TRUE	Shared Core
OG0001680	2	2	2	2	2	2	2	2	3	2	2	1	2	2	1	1	FALSE	Shared Core
OG0001681	1	1	1	1	1	1	1	2	3	2	3	3	3	3	2	3	FALSE	Shared Core
OG0001682	1	1	4	1	2	1	2	2	2	1	2	2	4	1	0	5	FALSE	Cbr-unique core
OG0001683	1	1	1	1	1	1	1	2	4	4	2	2	2	2	2	2	TRUE	Shared Core
OG0001684	3	0	0	0	0	0	0	3	5	0	1	1	8	3	6	1	FALSE	Dispensable
OG0001685	1	1	1	1	1	1	1	2	2	2	2	2	2	2	2	2	TRUE	Shared Core
OG0001686	2	2	2	2	1	2	3	3	1	4	1	1	1	1	4	1	FALSE	Shared Core
OG0001687	2	2	2	2	2	2	2	2	2	2	2	1	2	2	2	2	FALSE	Shared Core
OG0001688	1	1	1	1	1	1	6	1	2	1	4	2	1	2	1	4	FALSE	Shared Core
OG0001689	2	2	2	2	2	2	2	1	2	0	2	2	1	2	2	2	TRUE	Cbr-unique core
OG0001690	1	1	1	1	1	1	1	2	5	3	3	2	3	2	2	2	FALSE	Shared Core
OG0001691	1	1	1	1	1	1	1	2	2	2	3	3	3	2	2	4	FALSE	Shared Core
OG0001692	1	2	2	3	3	2	2	2	2	1	2	1	2	2	1	3	FALSE	Shared Core
OG0001693	1	1	1	1	1	1	1	2	2	2	2	2	2	2	2	6	TRUE	Shared Core
OG0001694	2	3	1	1	1	3	2	1	2	2	2	1	2	2	2	1	TRUE	Shared Core
OG0001695	1	1	1	1	1	1	1	2	3	2	2	2	2	2	2	3	TRUE	Shared Core
OG0001696	1	1	1	1	1	1	1	2	2	3	2	2	3	2	2	2	TRUE	Shared Core
OG0001697	1	1	1	1	1	1	1	1	1	1	1	1	1	1	2	1	TRUE	Shared Core
OG0001698	2	1	1	2	2	1	1	2	2	2	2	2	2	2	2	2	TRUE	Shared Core
OG0001699	1	1	1	1	1	1	1	2	2	2	2	2	2	2	2	2	TRUE	Shared Core
OG0001700	1	2	1	1	2	2	2	1	1	2	2	2	1	2	2	2	TRUE	Shared Core
OG0001701	1	2	3	2	2	2	2	1	1	1	1	2	2	2	1	2	TRUE	Shared Core
OG0001702	2	2	2	2	2	1	2	2	1	1	2	2	1	1	1	1	FALSE	Shared Core
OG0001703	1	2	2	2	2	2	2	1	4	1	2	1	2	1	1	2	TRUE	Shared Core
OG0001704	1	1	1	1	1	1	1	1	1	1	1	1	1	1	1	1	TRUE	Shared Core
OG0001705	1	1	3	2	3	1	1	2	2	1	1	1	1	2	1	1	TRUE	Shared Core
OG0001706	2	2	3	3	2	3	1	2	3	1	2	0	1	3	2	1	FALSE	Cbr-unique core
OG0001707	2	2	3	3	3	3	2	1	2	1	1	1	0	0	1	1	TRUE	Cbr-unique core
OG0001708	0	1	1	1	1	1	1	2	1	1	2	1	2	1	1	3	TRUE	Cni-unique core
OG0001709	0	0	0	1	0	0	0	2	2	2	2	2	2	2	2	3	TRUE	Cni-unique core
OG0001710	0	1	1	1	1	1	1	1	3	2	2	2	3	1	2	1	TRUE	Cni-unique core
OG0001711	0	0	0	0	0	0	0	5	2	6	5	1	4	2	2	3	FALSE	Cni-specific
OG0001712	0	1	1	2	1	1	1	2	2	2	2	2	1	2	3	2	TRUE	Cni-unique core
OG0001713	0	1	1	1	0	1	0	3	3	3	3	3	3	3	3	2	FALSE	Cni-unique core
OG0001714	0	1	1	1	1	0	1	2	1	3	3	4	2	3	5	2	FALSE	Cni-unique core
OG0001715	0	0	0	0	0	0	0	4	1	2	3	2	3	7	4	2	FALSE	Cni-specific
OG0001716	0	0	0	0	0	0	0	4	6	4	1	1	4	0	2	6	FALSE	Cni-specific
OG0001717	0	1	1	0	1	0	1	5	4	5	2	2	3	3	1	2	FALSE	Cni-unique core
OG0001718	0	1	1	1	2	1	1	2	2	2	3	3	3	4	3	2	FALSE	Cni-unique core
OG0001719	0	1	0	0	1	1	2	3	4	2	2	3	3	3	3	3	FALSE	Cni-unique core
OG0001720	0	0	0	0	0	0	0	5	4	2	4	3	2	4	3	4	FALSE	Cni-specific
OG0001721	0	0	3	2	1	0	1	0	4	2	5	0	1	4	5	3	FALSE	Dispensable
OG0001722	0	0	0	0	0	0	0	0	0	0	0	0	0	0	0	0	FALSE	Cni-specific
OG0001723	2	3	1	3	1	2	1	1	2	1	2	2	1	1	1	1	TRUE	Shared Core
OG0001724	1	1	1	1	1	1	1	2	2	2	2	2	2	2	2	2	TRUE	Shared Core
OG0001725	1	1	1	1	1	1	1	1	2	2	2	2	3	2	3	2	TRUE	Shared Core
OG0001726	2	1	1	1	1	1	1	2	2	2	2	2	2	2	2	2	TRUE	Shared Core
OG0001727	2	1	1	1	1	0	1	2	2	2	2	2	2	2	2	3	TRUE	Cni-unique core
OG0001728	1	1	1	1	1	1	1	3	2	2	2	2	2	2	2	2	TRUE	Shared Core
OG0001729	1	1	0	1	1	1	1	2	2	2	2	2	2	2	2	3	TRUE	Cni-unique core
OG0001730	1	1	1	1	1	1	1	3	2	3	2	3	2	2	2	1	TRUE	Shared Core
OG0001731	1	1	1	1	1	1	1	1	4	1	2	2	5	3	1	1	TRUE	Shared Core
OG0001732	5	3	4	4	3	3	2	2	0	0	0	3	0	0	0	0	FALSE	Cbr-unique core
OG0001733	1	1	1	1	1	1	1	2	3	2	2	2	2	2	1	3	TRUE	Shared Core
OG0001734	1	2	3	7	0	4	3	0	0	0	0	0	0	0	1	0	FALSE	Dispensable
OG0001735	1	1	1	1	1	1	1	2	4	2	4	2	2	2	2	2	FALSE	Shared Core
OG0001736	1	1	1	1	1	1	1	3	3	2	1	4	3	2	3	2	FALSE	Shared Core
OG0001737	1	1	1	1	1	1	1	2	2	2	2	2	2	2	2	2	TRUE	Shared Core
OG0001738	1	3	2	2	2	3	2	1	1	1	1	2	1	1	1	1	TRUE	Shared Core
OG0001739	1	1	1	1	1	1	1	2	2	3	3	2	2	3	3	3	FALSE	Shared Core
OG0001740	2	0	3	3	3	2	3	1	2	1	3	1	1	1	2	0	FALSE	Dispensable
OG0001741	2	2	2	2	2	2	2	2	1	2	2	2	2	1	1	2	FALSE	Shared Core
OG0001742	1	1	2	2	2	1	2	2	2	2	2	3	1	2	3	2	FALSE	Shared Core
OG0001743	2	2	0	2	2	1	2	3	2	2	2	1	2	2	1	4	FALSE	Cni-unique core
OG0001744	1	1	1	1	1	1	1	2	3	2	4	2	1	3	4	2	FALSE	Shared Core
OG0001745	2	1	2	0	2	2	2	2	2	2	2	2	2	2	2	2	FALSE	Cni-unique core
OG0001746	2	1	2	2	2	2	2	1	1	2	2	1	0	1	2	1	TRUE	Cbr-unique core
OG0001747	1	1	1	1	1	1	1	1	2	2	2	3	3	2	1	3	TRUE	Shared Core
OG0001748	1	1	0	0	1	1	1	3	3	3	2	3	3	3	3	2	FALSE	Cni-unique core
OG0001749	2	1	1	2	2	1	2	2	2	2	1	2	2	2	2	1	TRUE	Shared Core
OG0001750	1	1	1	1	1	1	1	2	3	4	2	4	2	2	2	2	FALSE	Shared Core
OG0001751	1	1	1	1	1	1	1	1	1	1	1	1	5	2	1	5	TRUE	Shared Core
OG0001752	1	1	1	1	1	1	1	2	2	2	1	2	2	4	2	2	TRUE	Shared Core
OG0001753	1	1	1	1	1	1	1	2	1	2	3	1	2	1	2	3	TRUE	Shared Core
OG0001754	1	1	1	1	1	1	1	1	1	1	1	2	1	1	1	1	TRUE	Shared Core
OG0001755	2	2	2	2	2	2	2	2	1	2	1	2	2	2	2	2	FALSE	Shared Core
OG0001756	2	2	2	2	2	2	2	1	2	1	1	1	1	2	1	2	TRUE	Shared Core
OG0001757	1	1	1	1	1	1	1	1	2	1	2	3	3	2	2	2	TRUE	Shared Core
OG0001758	1	1	1	1	1	1	1	1	1	5	2	2	2	1	3	4	TRUE	Shared Core
OG0001759	1	1	2	2	1	1	1	4	3	1	2	2	1	1	2	2	TRUE	Shared Core
OG0001760	3	2	2	1	2	2	2	1	2	1	1	1	1	1	1	1	TRUE	Shared Core
OG0001761	1	1	1	1	1	1	1	2	3	2	1	2	1	3	2	1	TRUE	Shared Core
OG0001762	1	1	1	1	1	1	1	2	3	2	2	2	2	2	2	2	TRUE	Shared Core
OG0001763	1	1	1	0	1	1	1	3	0	3	7	3	3	1	1	3	FALSE	Dispensable
OG0001764	1	1	1	1	1	1	1	2	3	3	3	2	2	2	2	3	FALSE	Shared Core
OG0001765	1	1	1	1	1	1	1	2	2	2	2	2	2	2	2	2	TRUE	Shared Core
OG0001766	1	1	1	1	1	1	1	2	2	2	2	2	2	2	2	2	TRUE	Shared Core
OG0001767	1	1	1	1	2	1	2	0	2	2	3	3	2	2	4	3	FALSE	Cbr-unique core
OG0001768	1	1	1	1	1	1	1	3	0	5	2	3	2	2	2	4	FALSE	Cbr-unique core
OG0001769	2	2	1	1	1	2	2	1	2	2	1	1	1	2	2	2	TRUE	Shared Core
OG0001770	1	2	2	2	2	1	2	2	2	2	2	2	2	2	2	2	FALSE	Shared Core
OG0001771	2	2	2	2	2	2	2	2	4	1	2	1	1	1	1	1	TRUE	Shared Core
OG0001772	1	1	1	1	1	1	1	2	2	2	3	2	2	2	2	2	TRUE	Shared Core
OG0001773	1	2	2	2	2	2	2	2	1	2	2	2	1	1	1	2	TRUE	Shared Core
OG0001774	1	1	1	1	1	1	5	2	2	2	2	2	4	2	1	2	FALSE	Shared Core
OG0001775	2	1	1	2	1	1	1	2	1	1	1	1	4	1	3	1	TRUE	Shared Core
OG0001776	2	0	2	2	3	0	2	2	2	2	2	2	3	2	2	2	FALSE	Cni-unique core
OG0001777	1	1	1	1	1	1	1	2	3	2	3	2	2	2	2	3	TRUE	Shared Core
OG0001778	1	1	0	0	0	0	0	3	2	3	3	1	3	3	3	2	TRUE	Cni-unique core
OG0001779	2	2	2	2	2	2	2	1	2	1	1	1	1	1	2	1	TRUE	Shared Core
OG0001780	2	1	1	2	1	1	1	2	2	2	2	2	0	2	2	3	TRUE	Cbr-unique core
OG0001781	1	1	1	1	1	1	1	2	2	2	2	2	2	2	2	3	TRUE	Shared Core
OG0001782	1	1	1	1	1	1	1	2	3	2	4	2	3	3	2	2	FALSE	Shared Core
OG0001783	2	2	2	2	2	2	2	1	1	2	1	1	1	2	1	2	TRUE	Shared Core
OG0001784	2	2	2	2	2	2	2	1	1	1	1	1	1	1	2	3	TRUE	Shared Core
OG0001785	2	2	2	2	2	2	2	1	2	1	1	1	1	1	1	2	TRUE	Shared Core
OG0001786	1	2	1	1	1	2	1	2	2	2	1	2	2	2	1	2	TRUE	Shared Core
OG0001787	1	1	1	1	1	1	1	2	3	2	2	1	1	0	1	3	TRUE	Cbr-unique core
OG0001788	1	1	1	1	1	1	1	2	4	1	2	2	3	2	2	4	FALSE	Shared Core
OG0001789	1	1	1	1	1	1	1	2	4	2	2	2	2	2	2	2	TRUE	Shared Core
OG0001790	1	1	1	1	0	1	1	1	3	1	3	2	2	2	3	2	TRUE	Cni-unique core
OG0001791	1	1	1	1	1	1	2	2	2	2	2	2	2	2	2	2	TRUE	Shared Core
OG0001792	1	1	1	1	1	1	1	2	2	2	2	2	2	3	2	3	TRUE	Shared Core
OG0001793	1	1	1	1	1	1	1	2	2	2	2	2	2	2	2	2	TRUE	Shared Core
OG0001794	1	3	2	3	2	2	3	1	1	1	1	1	1	1	1	2	TRUE	Shared Core
OG0001795	2	1	2	2	2	2	2	2	4	2	2	1	0	2	2	1	FALSE	Cbr-unique core
OG0001796	2	2	0	2	2	2	0	2	4	2	1	1	4	2	2	1	FALSE	Cni-unique core
OG0001797	1	1	1	1	1	1	1	2	4	2	2	2	1	2	2	2	TRUE	Shared Core
OG0001798	2	2	1	1	1	1	2	2	2	2	4	2	2	2	2	2	FALSE	Shared Core
OG0001799	1	2	3	3	3	2	2	1	1	1	1	1	1	1	1	2	TRUE	Shared Core
OG0001800	0	0	0	0	0	0	0	0	0	0	0	0	0	0	0	0	FALSE	Cni-specific
OG0001801	0	1	0	2	2	1	1	3	4	2	2	2	2	3	2	2	FALSE	Cni-unique core
OG0001802	0	0	3	4	3	1	0	2	0	2	2	2	4	1	1	3	TRUE	Dispensable
OG0001803	0	0	0	0	0	0	0	0	9	2	7	5	1	3	1	1	FALSE	Cni-specific
OG0001804	0	0	0	0	0	0	0	4	10	3	1	1	2	1	0	4	FALSE	Cni-specific
OG0001805	0	1	2	1	1	1	1	3	3	2	3	3	2	3	2	2	FALSE	Cni-unique core
OG0001806	0	2	3	0	0	0	1	2	2	14	1	1	0	2	2	0	FALSE	Dispensable
OG0001807	0	0	0	0	0	0	0	4	7	3	2	6	1	3	2	2	FALSE	Cni-specific
OG0001808	0	0	0	0	0	0	0	4	6	4	0	2	2	8	1	3	FALSE	Cni-specific
OG0001809	0	0	0	0	0	0	0	4	6	7	2	2	2	2	3	2	FALSE	Cni-specific
OG0001810	0	0	0	0	0	0	0	3	3	3	3	3	3	2	7	3	FALSE	Cni-specific
OG0001811	0	0	0	0	0	0	0	4	1	2	5	2	4	4	3	5	FALSE	Cni-specific
OG0001812	0	0	0	0	7	6	0	0	2	3	0	1	3	4	2	2	FALSE	Dispensable
OG0001813	0	0	3	3	0	0	0	3	1	2	4	2	4	3	2	3	FALSE	Cni-unique core
OG0001814	0	0	0	0	0	0	0	2	2	2	7	2	5	2	2	6	FALSE	Cni-specific
OG0001815	1	2	2	2	4	2	2	1	2	1	1	1	2	3	1	2	FALSE	Shared Core
OG0001816	2	2	2	2	2	2	2	1	3	1	1	1	1	1	1	1	TRUE	Shared Core
OG0001817	1	1	1	1	1	1	1	2	2	2	2	2	2	2	2	2	TRUE	Shared Core
OG0001818	1	1	1	1	1	1	1	2	2	2	2	2	2	2	2	3	TRUE	Shared Core
OG0001819	1	2	1	1	1	1	1	2	2	2	1	1	1	2	2	2	TRUE	Shared Core
OG0001820	1	2	3	3	2	2	3	1	2	1	2	1	2	1	2	1	FALSE	Shared Core
OG0001821	1	1	1	1	1	1	1	1	2	2	2	2	2	2	2	2	TRUE	Shared Core
OG0001822	1	1	1	1	1	1	1	2	2	2	2	2	1	4	2	1	TRUE	Shared Core
OG0001823	1	1	1	1	1	1	1	4	2	2	2	1	3	4	2	2	FALSE	Shared Core
OG0001824	1	1	1	1	1	1	1	2	2	2	2	2	3	3	2	2	TRUE	Shared Core
OG0001825	1	1	1	1	1	1	1	2	2	2	2	2	2	2	2	2	TRUE	Shared Core
OG0001826	3	3	4	3	3	3	3	0	1	2	1	1	1	0	0	1	FALSE	Cbr-unique core
OG0001827	1	1	1	1	1	1	1	2	2	2	2	2	3	2	2	2	TRUE	Shared Core
OG0001828	1	2	1	1	1	1	1	3	2	2	3	2	2	2	2	2	FALSE	Shared Core
OG0001829	1	2	1	1	1	1	1	2	2	3	2	2	2	2	2	2	FALSE	Shared Core
OG0001830	2	1	1	1	1	1	1	2	2	2	2	2	2	2	2	2	TRUE	Shared Core
OG0001831	1	1	1	1	1	1	3	2	2	2	2	2	2	2	2	2	TRUE	Shared Core
OG0001832	1	1	2	2	1	1	2	2	2	2	1	1	1	2	2	2	TRUE	Shared Core
OG0001833	2	2	2	2	1	2	1	1	2	2	1	2	1	1	2	1	TRUE	Shared Core
OG0001834	1	2	1	1	1	1	2	2	2	2	2	3	2	1	2	2	TRUE	Shared Core
OG0001835	2	1	1	1	1	1	1	2	2	2	2	2	2	1	2	2	TRUE	Shared Core
OG0001836	1	1	1	2	1	1	1	2	2	2	2	2	2	2	2	2	TRUE	Shared Core
OG0001837	1	1	1	1	1	1	1	2	1	2	2	1	2	4	3	1	TRUE	Shared Core
OG0001838	1	1	1	1	1	1	1	2	4	3	2	2	2	1	3	3	FALSE	Shared Core
OG0001839	2	1	3	3	4	2	2	1	1	1	2	1	1	1	1	1	TRUE	Shared Core
OG0001840	2	1	1	1	1	1	1	2	2	2	2	2	2	2	3	2	FALSE	Shared Core
OG0001841	1	1	0	1	1	1	1	2	4	2	3	2	1	2	5	2	FALSE	Cni-unique core
OG0001842	2	2	2	2	2	1	2	1	1	1	1	1	1	1	1	1	TRUE	Shared Core
OG0001843	1	1	1	1	1	1	1	3	2	2	2	2	2	2	2	2	TRUE	Shared Core
OG0001844	1	1	1	1	1	1	1	2	2	1	2	2	2	1	2	2	TRUE	Shared Core
OG0001845	2	5	0	2	6	0	1	4	1	2	2	1	0	2	1	0	FALSE	Dispensable
OG0001846	1	1	1	1	1	1	1	1	1	1	1	1	0	1	1	1	TRUE	Cbr-unique core
OG0001847	1	1	1	1	1	1	1	1	1	1	1	1	1	1	1	1	TRUE	Shared Core
OG0001848	1	1	1	0	0	0	0	1	1	2	1	1	2	1	1	1	TRUE	Cni-unique core
OG0001849	1	1	2	1	1	1	2	2	2	2	2	2	2	2	2	2	FALSE	Shared Core
OG0001850	1	1	1	1	1	1	1	2	1	2	1	1	1	1	1	1	TRUE	Shared Core
OG0001851	1	1	1	1	1	1	1	2	2	2	3	1	1	2	1	5	FALSE	Shared Core
OG0001852	1	1	1	1	1	1	1	1	1	1	2	2	1	1	1	6	TRUE	Shared Core
OG0001853	2	1	1	1	2	2	1	1	1	1	1	1	1	2	1	1	TRUE	Shared Core
OG0001854	1	1	1	1	1	1	1	1	3	1	2	1	2	3	1	1	TRUE	Shared Core
OG0001855	1	1	1	1	1	1	1	2	1	2	2	2	2	3	3	2	TRUE	Shared Core
OG0001856	1	1	1	1	1	1	1	2	1	1	1	2	1	2	2	3	TRUE	Shared Core
OG0001857	1	1	1	1	1	1	1	2	1	2	2	2	2	1	1	1	TRUE	Shared Core
OG0001858	1	1	1	1	1	1	1	2	2	2	2	2	2	2	2	2	TRUE	Shared Core
OG0001859	1	0	2	1	2	1	1	5	1	2	3	1	1	4	2	2	FALSE	Cni-unique core
OG0001860	2	1	1	1	1	1	1	3	3	3	2	1	1	2	2	1	TRUE	Shared Core
OG0001861	1	1	1	1	1	1	2	2	2	2	2	2	2	3	2	3	FALSE	Shared Core
OG0001862	1	1	1	1	1	1	1	1	4	2	3	2	2	3	3	2	FALSE	Shared Core
OG0001863	1	1	1	1	1	1	1	2	2	2	2	2	2	2	2	2	TRUE	Shared Core
OG0001864	1	1	1	1	1	1	1	2	2	2	2	2	2	2	2	2	TRUE	Shared Core
OG0001865	2	2	2	1	1	1	3	1	1	1	3	2	1	1	1	2	TRUE	Shared Core
OG0001866	1	1	1	1	1	1	1	7	1	3	1	1	1	1	3	1	TRUE	Shared Core
OG0001867	2	3	2	2	2	3	3	1	1	1	1	1	1	1	1	1	TRUE	Shared Core
OG0001868	2	2	1	2	2	2	2	2	1	2	2	2	2	1	2	2	FALSE	Shared Core
OG0001869	1	2	1	1	1	2	0	2	2	3	2	3	2	2	2	3	FALSE	Cni-unique core
OG0001870	1	1	1	1	1	1	1	1	1	1	3	1	2	1	2	1	TRUE	Shared Core
OG0001871	1	1	0	1	0	1	1	2	2	2	3	1	2	1	1	2	FALSE	Cni-unique core
OG0001872	2	2	2	2	2	2	3	0	1	0	1	1	2	1	1	2	TRUE	Cbr-unique core
OG0001873	1	1	1	1	1	1	1	2	2	2	2	2	2	2	2	2	TRUE	Shared Core
OG0001874	1	1	1	1	1	1	1	1	2	1	1	1	1	1	1	2	TRUE	Shared Core
OG0001875	1	3	2	1	1	3	1	1	1	1	1	1	1	1	1	2	TRUE	Shared Core
OG0001876	1	2	1	1	1	1	1	6	2	0	1	6	0	0	0	3	TRUE	Cbr-unique core
OG0001877	2	2	2	2	2	2	2	2	1	2	2	2	1	1	2	2	FALSE	Shared Core
OG0001878	1	1	1	1	1	1	1	2	2	2	2	2	2	2	2	2	TRUE	Shared Core
OG0001879	1	2	2	2	2	2	2	2	2	2	1	1	1	1	1	1	TRUE	Shared Core
OG0001880	1	1	1	1	1	1	1	1	1	1	1	1	1	1	1	2	TRUE	Shared Core
OG0001881	1	0	1	1	1	0	1	2	3	2	3	2	2	2	2	5	FALSE	Cni-unique core
OG0001882	2	2	1	1	1	1	1	0	1	2	1	1	1	1	1	3	TRUE	Cbr-unique core
OG0001883	1	1	1	0	1	1	1	2	3	2	3	2	2	2	3	3	FALSE	Cni-unique core
OG0001884	2	2	2	2	3	2	2	1	3	1	1	1	1	1	1	1	TRUE	Shared Core
OG0001885	1	1	1	1	1	1	1	1	2	1	1	1	1	1	1	1	TRUE	Shared Core
OG0001886	1	1	1	1	1	1	1	2	3	2	2	1	3	2	3	4	FALSE	Shared Core
OG0001887	1	1	2	2	1	2	1	2	3	2	1	1	1	1	2	3	TRUE	Shared Core
OG0001888	1	1	1	1	1	1	1	2	2	2	2	2	2	2	2	3	TRUE	Shared Core
OG0001889	2	2	2	2	2	2	2	1	1	1	1	1	1	1	1	2	TRUE	Shared Core
OG0001890	1	1	1	1	1	1	2	1	4	1	2	2	2	2	2	3	FALSE	Shared Core
OG0001891	1	1	1	1	1	1	1	1	1	1	1	1	1	1	1	1	TRUE	Shared Core
OG0001892	1	1	1	1	1	1	1	3	2	2	2	1	4	2	2	1	TRUE	Shared Core
OG0001893	2	1	1	1	1	1	1	2	2	2	2	2	2	2	2	2	TRUE	Shared Core
OG0001894	1	1	2	2	1	1	2	2	2	2	2	2	2	2	2	2	FALSE	Shared Core
OG0001895	1	1	1	1	1	1	1	2	2	2	2	2	1	2	2	2	TRUE	Shared Core
OG0001896	1	1	1	1	1	1	1	2	2	2	2	2	2	2	2	2	TRUE	Shared Core
OG0001897	1	1	1	1	1	1	1	2	5	2	3	1	2	2	3	2	FALSE	Shared Core
OG0001898	2	2	2	2	2	2	1	2	2	2	1	2	1	2	2	2	FALSE	Shared Core
OG0001899	1	3	2	2	2	3	2	1	1	1	2	1	1	1	1	1	TRUE	Shared Core
OG0001900	2	2	2	1	2	2	2	2	2	1	1	2	3	1	1	2	FALSE	Shared Core
OG0001901	1	1	3	1	1	1	1	1	1	1	1	1	3	3	3	2	FALSE	Shared Core
OG0001902	1	1	1	2	2	1	2	0	2	2	4	2	2	2	2	3	FALSE	Cbr-unique core
OG0001903	1	1	1	1	0	0	1	4	3	4	3	0	0	4	3	3	FALSE	Dispensable
OG0001904	1	1	1	1	1	1	1	2	2	1	2	2	2	1	2	2	TRUE	Shared Core
OG0001905	0	0	0	0	0	0	0	0	0	0	0	0	0	0	0	0	TRUE	Cni-specific
OG0001906	0	1	1	1	1	1	1	2	2	2	0	2	2	1	2	1	TRUE	Dispensable
OG0001907	0	0	0	0	0	0	0	2	2	2	2	2	2	2	2	2	TRUE	Cni-specific
OG0001908	0	0	0	0	0	0	2	2	2	2	2	4	2	3	2	2	FALSE	Cni-unique core
OG0001909	0	1	2	1	1	2	2	1	2	2	2	3	3	1	2	3	FALSE	Cni-unique core
OG0001910	0	1	2	2	2	1	2	1	2	2	1	2	2	1	1	2	TRUE	Cni-unique core
OG0001911	0	0	3	2	0	2	2	2	2	2	2	2	1	2	2	1	TRUE	Cni-unique core
OG0001912	0	1	0	0	0	0	0	11	0	2	0	4	3	1	6	1	FALSE	Dispensable
OG0001913	0	0	1	1	2	0	1	2	2	1	3	4	3	1	5	3	FALSE	Cni-unique core
OG0001914	0	0	0	0	0	0	0	0	3	3	6	1	2	3	5	6	FALSE	Cni-specific
OG0001915	0	0	0	0	0	0	0	2	4	3	3	2	1	3	2	9	FALSE	Cni-specific
OG0001916	0	0	0	0	0	0	0	4	4	4	4	3	3	3	2	2	FALSE	Cni-specific
OG0001917	0	0	1	1	1	0	1	2	2	3	3	3	2	3	5	2	FALSE	Cni-unique core
OG0001918	1	1	1	1	1	1	1	1	8	1	1	1	2	1	1	1	TRUE	Shared Core
OG0001919	1	1	1	1	1	1	1	2	5	2	2	2	2	2	2	2	FALSE	Shared Core
OG0001920	1	1	1	1	1	1	1	2	2	2	2	2	2	2	2	2	TRUE	Shared Core
OG0001921	1	1	1	1	1	1	1	2	2	2	2	1	2	2	2	2	TRUE	Shared Core
OG0001922	2	2	2	2	2	2	2	1	1	1	1	1	1	1	1	2	TRUE	Shared Core
OG0001923	1	1	1	1	1	1	1	2	2	2	2	2	2	2	1	1	TRUE	Shared Core
OG0001924	1	1	1	1	1	1	1	2	2	3	2	3	2	2	3	2	FALSE	Shared Core
OG0001925	1	1	1	1	1	1	1	2	1	2	3	2	2	2	2	2	TRUE	Shared Core
OG0001926	1	2	2	2	2	2	2	1	1	1	1	1	1	2	2	1	TRUE	Shared Core
OG0001927	1	2	2	2	2	2	2	2	1	1	1	2	1	1	1	1	TRUE	Shared Core
OG0001928	2	2	2	1	2	2	2	2	2	1	2	1	1	0	2	4	FALSE	Cbr-unique core
OG0001929	1	1	2	1	1	1	1	2	2	2	2	3	2	2	2	2	FALSE	Shared Core
OG0001930	1	1	1	1	1	1	1	1	1	1	1	1	1	1	1	1	TRUE	Shared Core
OG0001931	1	1	1	1	1	1	1	1	1	1	1	1	1	1	1	1	TRUE	Shared Core
OG0001932	1	1	1	1	1	1	1	1	1	1	1	1	1	1	1	1	TRUE	Shared Core
OG0001933	2	2	4	3	3	2	3	1	1	1	1	1	1	1	1	1	FALSE	Shared Core
OG0001934	1	0	1	1	1	0	0	2	3	2	2	3	2	3	2	3	TRUE	Cni-unique core
OG0001935	1	2	1	1	1	2	1	2	2	2	2	2	2	2	2	2	FALSE	Shared Core
OG0001936	1	1	2	2	1	1	2	2	2	2	2	2	2	2	3	1	FALSE	Shared Core
OG0001937	2	2	1	2	1	1	2	1	2	1	1	1	2	1	2	1	TRUE	Shared Core
OG0001938	1	1	1	1	1	1	1	2	1	2	2	2	2	1	2	1	TRUE	Shared Core
OG0001939	2	2	2	2	2	2	2	1	1	1	1	2	1	1	1	1	TRUE	Shared Core
OG0001940	1	1	1	1	1	1	1	2	2	2	2	3	2	2	1	2	TRUE	Shared Core
OG0001941	1	1	1	1	1	1	1	1	1	1	1	1	1	1	1	1	TRUE	Shared Core
OG0001942	1	1	1	1	1	1	1	2	2	2	2	2	2	2	2	2	TRUE	Shared Core
OG0001943	2	2	2	2	2	2	2	1	1	1	1	1	1	2	1	1	TRUE	Shared Core
OG0001944	1	1	1	1	1	1	1	2	1	1	4	1	3	3	2	1	TRUE	Shared Core
OG0001945	1	1	1	1	1	1	1	2	2	2	2	2	2	2	2	2	TRUE	Shared Core
OG0001946	2	2	2	2	2	2	2	1	1	1	1	1	1	1	1	1	TRUE	Shared Core
OG0001947	2	4	3	3	3	3	2	0	3	0	0	0	0	0	4	0	FALSE	Cbr-unique core
OG0001948	1	1	2	1	2	1	2	2	1	2	2	1	2	2	2	1	TRUE	Shared Core
OG0001949	2	2	2	2	2	2	2	1	1	1	1	1	1	1	1	1	TRUE	Shared Core
OG0001950	1	1	1	1	1	1	1	2	2	2	3	2	2	1	2	2	TRUE	Shared Core
OG0001951	1	1	1	1	1	1	1	1	1	1	1	1	1	2	1	2	TRUE	Shared Core
OG0001952	2	2	2	3	4	2	3	1	1	1	1	2	1	1	1	1	FALSE	Shared Core
OG0001953	1	2	2	2	1	1	2	2	2	2	1	2	2	2	2	2	FALSE	Shared Core
OG0001954	1	1	1	1	1	1	1	2	4	2	2	2	2	2	3	2	FALSE	Shared Core
OG0001955	1	1	1	1	1	1	1	1	1	1	1	1	1	1	1	1	TRUE	Shared Core
OG0001956	1	1	1	0	1	2	2	1	2	2	1	7	1	1	2	3	FALSE	Cni-unique core
OG0001957	1	0	1	2	1	1	1	2	2	1	2	2	2	2	3	2	TRUE	Cni-unique core
OG0001958	1	1	4	2	5	4	7	0	1	0	0	0	0	1	1	1	FALSE	Cbr-unique core
OG0001959	1	1	1	1	1	1	1	1	2	3	1	3	1	3	1	1	TRUE	Shared Core
OG0001960	1	1	1	1	1	1	1	1	2	1	1	1	5	3	1	2	TRUE	Shared Core
OG0001961	1	2	2	2	2	1	2	1	1	1	1	1	1	1	1	1	TRUE	Shared Core
OG0001962	1	1	1	1	1	1	2	3	3	3	2	0	1	1	3	2	FALSE	Cbr-unique core
OG0001963	1	1	1	1	1	1	1	1	1	1	1	1	1	1	1	1	TRUE	Shared Core
OG0001964	1	1	1	1	1	1	1	1	3	1	1	2	1	2	2	2	TRUE	Shared Core
OG0001965	1	1	1	1	1	1	1	2	1	2	2	2	1	2	2	2	TRUE	Shared Core
OG0001966	1	2	2	2	2	2	2	1	1	1	1	1	1	1	1	1	TRUE	Shared Core
OG0001967	1	2	2	2	2	2	2	1	1	1	1	1	1	1	2	1	TRUE	Shared Core
OG0001968	1	1	1	2	1	2	2	2	2	2	1	1	1	2	2	1	TRUE	Shared Core
OG0001969	1	1	1	1	1	1	1	2	2	2	2	3	2	2	3	3	FALSE	Shared Core
OG0001970	1	1	1	1	1	1	1	2	2	3	1	3	2	2	3	2	FALSE	Shared Core
OG0001971	1	2	1	1	1	1	1	2	2	2	1	1	2	2	1	2	TRUE	Shared Core
OG0001972	2	2	2	2	2	2	2	1	1	1	2	2	1	1	1	1	TRUE	Shared Core
OG0001973	1	1	1	1	1	1	1	1	6	2	1	2	1	1	1	1	TRUE	Shared Core
OG0001974	1	1	1	1	1	1	1	2	2	2	3	2	2	2	2	2	TRUE	Shared Core
OG0001975	1	1	1	1	1	1	1	2	4	2	1	2	1	3	2	1	TRUE	Shared Core
OG0001976	1	1	1	1	1	1	1	2	2	2	2	2	3	2	2	1	TRUE	Shared Core
OG0001977	1	1	1	1	1	1	1	1	1	1	1	1	1	1	1	1	TRUE	Shared Core
OG0001978	1	1	1	1	1	1	1	2	2	2	2	2	2	2	1	2	TRUE	Shared Core
OG0001979	2	2	2	2	2	2	2	2	1	2	1	2	2	2	1	1	FALSE	Shared Core
OG0001980	2	1	2	1	2	1	1	2	2	2	2	2	2	2	2	2	FALSE	Shared Core
OG0001981	1	1	0	1	1	1	1	2	2	2	2	2	2	2	1	2	TRUE	Cni-unique core
OG0001982	1	1	1	1	1	1	1	2	2	2	2	2	2	2	2	2	TRUE	Shared Core
OG0001983	3	3	2	4	3	1	1	1	1	1	2	1	1	1	2	1	FALSE	Shared Core
OG0001984	1	1	1	1	2	1	2	0	2	2	3	2	2	3	3	2	FALSE	Cbr-unique core
OG0001985	1	1	1	1	1	1	1	2	2	2	2	2	2	2	2	2	TRUE	Shared Core
OG0001986	2	2	2	2	2	2	2	1	1	1	1	1	1	1	1	1	TRUE	Shared Core
OG0001987	1	1	1	1	1	1	1	2	2	2	2	3	3	2	2	2	FALSE	Shared Core
OG0001988	2	1	1	1	1	1	1	1	2	2	2	2	2	2	2	2	TRUE	Shared Core
OG0001989	1	1	2	2	2	1	2	2	2	2	2	2	2	1	2	2	FALSE	Shared Core
OG0001990	1	1	2	2	1	1	1	2	3	2	3	2	2	1	2	2	FALSE	Shared Core
OG0001991	2	2	2	2	2	2	2	1	1	2	2	1	2	2	2	1	FALSE	Shared Core
OG0001992	1	1	1	1	1	1	1	2	2	2	2	2	2	2	2	2	TRUE	Shared Core
OG0001993	2	2	1	3	3	2	2	1	2	1	1	1	1	1	2	3	FALSE	Shared Core
OG0001994	2	2	3	3	1	2	2	1	1	1	1	1	1	1	0	1	TRUE	Cbr-unique core
OG0001995	2	1	1	1	1	1	1	2	1	2	2	2	2	1	2	1	TRUE	Shared Core
OG0001996	1	1	1	1	1	1	1	2	2	2	1	1	1	2	1	2	TRUE	Shared Core
OG0001997	1	2	3	2	2	2	2	1	1	1	1	1	1	1	1	2	TRUE	Shared Core
[truncated: 28,060 more rows]
