# Supplementary material for: Pangenome analysis reveals families of ubiquitin-ligase adaptors as key genomic divergence drivers that lead to hybrid incompatibility
Source: HighWire-hosted journal article supplement (doi:10.1101/gr.280885.125), 2026-02-17
Supplement: Supplemental_Table_S5.xlsx [file Supplemental_Table_S5.xlsx]

## Sheet: Sheet1
Supplemental Table 5 Gene expansion and cotaction analysis results of F-box gene families across the five caenorhabditis species and each ancestral node.
Note that a negative and postive value of Change represents contraction and expansion, respectively.
Orthogroup	Node	Count	Change	P value
OG0000001	Cel	0	-1	0.286428
OG0000001	7	3	2	0.023945
OG0000001	Cbn	1	-2	0.275079
OG0000001	8	5	2	0.0346868
OG0000001	Cre	1	-4	0.0280505
OG0000001	9	50	45	3.66834e-21
OG0000001	Cbr	28	-22	5.21232e-16
OG0000001	Cni	108	58	8.48135e-53
OG0000002	Cel	0	-1	0.286428
OG0000002	7	3	2	0.023945
OG0000002	Cbn	1	-2	0.275079
OG0000002	8	4	1	0.123322
OG0000002	Cre	2	-2	0.287203
OG0000002	9	32	28	2.32902e-13
OG0000002	Cbr	13	-19	3.88826e-17
OG0000002	Cni	82	50	9.18238e-50
OG0000003	Cel	0	-1	0.286428
OG0000003	7	1	0	0.699357
OG0000003	Cbn	0	-1	0.381274
OG0000003	8	1	0	0.579948
OG0000003	Cre	0	-1	0.33055
OG0000003	9	22	21	2.10836e-12
OG0000003	Cbr	5	-17	2.03903e-18
OG0000003	Cni	68	46	4.50664e-49
OG0000004	Cel	0	-1	0.286428
OG0000004	7	3	2	0.023945
OG0000004	Cbn	3	0	0.629539
OG0000004	8	3	0	0.688739
OG0000004	Cre	0	-3	0.0313745
OG0000004	9	23	20	4.80135e-10
OG0000004	Cbr	6	-17	5.87867e-18
OG0000004	Cni	66	43	6.2481e-45
OG0000005	Cel	0	-1	0.286428
OG0000005	7	6	5	0.000271203
OG0000005	Cbn	3	-3	0.237053
OG0000005	8	10	4	0.00210144
OG0000005	Cre	12	2	0.395375
OG0000005	9	26	16	1.80253e-05
OG0000005	Cbr	6	-20	2.32529e-21
OG0000005	Cni	63	37	1.9232e-36
OG0000006	Cel	0	-1	0.286428
OG0000006	7	3	2	0.023945
OG0000006	Cbn	2	-1	0.875237
OG0000006	8	4	1	0.123322
OG0000006	Cre	2	-2	0.287203
OG0000006	9	20	16	1.64993e-07
OG0000006	Cbr	5	-15	5.00509e-16
OG0000006	Cni	54	34	3.17389e-35
OG0000008	Cel	0	-1	0.286428
OG0000008	7	2	1	0.106624
OG0000008	Cbn	0	-2	0.180437
OG0000008	8	4	2	0.016206
OG0000008	Cre	3	-1	0.640768
OG0000008	9	21	17	5.53505e-08
OG0000008	Cbr	12	-9	2.32271e-07
OG0000008	Cni	44	23	6.9176e-22
OG0000009	Cel	0	-1	0.286428
OG0000009	7	3	2	0.023945
OG0000009	Cbn	2	-1	0.875237
OG0000009	8	4	1	0.123322
OG0000009	Cre	3	-1	0.640768
OG0000009	9	19	15	4.87933e-07
OG0000009	Cbr	8	-11	2.24235e-10
OG0000009	Cni	45	26	5.09956e-26
OG0000011	Cel	0	-1	0.286428
OG0000011	7	3	2	0.023945
OG0000011	Cbn	3	0	0.629539
OG0000011	8	3	0	0.688739
OG0000011	Cre	1	-2	0.219382
OG0000011	9	15	12	4.19142e-06
OG0000011	Cbr	2	-13	1.85036e-15
OG0000011	Cni	46	31	1.04763e-33
OG0000014	Cel	0	-1	0.286428
OG0000014	7	1	0	0.699357
OG0000014	Cbn	0	-1	0.381274
OG0000014	8	1	0	0.579948
OG0000014	Cre	0	-1	0.33055
OG0000014	9	18	17	3.04388e-10
OG0000014	Cbr	14	-4	0.00599736
OG0000014	Cni	28	10	1.83972e-08
OG0000016	Cel	1	-1	0.442773
OG0000016	7	9	7	7.10634e-05
OG0000016	Cbn	9	0	0.792037
OG0000016	8	11	2	0.0908499
OG0000016	Cre	15	4	0.129954
OG0000016	9	20	9	0.0062208
OG0000016	Cbr	6	-14	3.30433e-14
OG0000016	Cni	40	20	9.20763e-19
OG0000017	Cel	1	0	0.699357
OG0000017	7	2	1	0.106624
OG0000017	Cbn	3	1	0.316195
OG0000017	8	2	0	0.641265
OG0000017	Cre	0	-2	0.138579
OG0000017	9	13	11	3.46385e-06
OG0000017	Cbr	5	-8	5.11193e-08
OG0000017	Cni	35	22	1.65322e-23
OG0000019	Cel	0	-1	0.286428
OG0000019	7	7	6	6.09051e-05
OG0000019	Cbn	4	-3	0.275175
OG0000019	8	10	3	0.0232154
OG0000019	Cre	17	7	0.0139684
OG0000019	9	18	8	0.01117
OG0000019	Cbr	9	-9	6.11593e-08
OG0000019	Cni	31	13	1.78214e-11
OG0000026	Cel	0	-1	0.286428
OG0000026	7	1	0	0.699357
OG0000026	Cbn	0	-1	0.381274
OG0000026	8	2	1	0.0414236
OG0000026	Cre	2	0	0.818195
OG0000026	9	12	10	1.10803e-05
OG0000026	Cbr	3	-9	4.18448e-10
OG0000026	Cni	36	24	2.13383e-26
OG0000031	Cel	0	-1	0.286428
OG0000031	7	1	0	0.699357
OG0000031	Cbn	0	-1	0.381274
OG0000031	8	1	0	0.579948
OG0000031	Cre	0	-1	0.33055
OG0000031	9	9	8	2.1992e-05
OG0000031	Cbr	3	-6	9.64864e-07
OG0000031	Cni	24	15	1.30116e-16
OG0000035	Cel	0	-1	0.286428
OG0000035	7	2	1	0.106624
OG0000035	Cbn	1	-1	0.547436
OG0000035	8	2	0	0.641265
OG0000035	Cre	1	-1	0.492733
OG0000035	9	13	11	3.46385e-06
OG0000035	Cbr	9	-4	0.00206154
OG0000035	Cni	23	10	1.46482e-09
OG0000037	Cel	0	-1	0.286428
OG0000037	7	1	0	0.699357
OG0000037	Cbn	1	0	0.77171
OG0000037	8	1	0	0.579948
OG0000037	Cre	0	-1	0.33055
OG0000037	9	8	7	7.62318e-05
OG0000037	Cbr	3	-5	2.53773e-05
OG0000037	Cni	23	15	4.87546e-17
OG0000041	Cel	0	-1	0.286428
OG0000041	7	1	0	0.699357
OG0000041	Cbn	0	-1	0.381274
OG0000041	8	1	0	0.579948
OG0000041	Cre	0	-1	0.33055
OG0000041	9	9	8	2.1992e-05
OG0000041	Cbr	0	-9	3.32568e-12
OG0000041	Cni	34	25	3.5452e-29
OG0000045	Cel	0	-1	0.286428
OG0000045	7	1	0	0.699357
OG0000045	Cbn	0	-1	0.381274
OG0000045	8	1	0	0.579948
OG0000045	Cre	0	-1	0.33055
OG0000045	9	11	10	1.83031e-06
OG0000045	Cbr	5	-6	3.89134e-06
OG0000045	Cni	27	16	4.81148e-17
OG0000046	Cel	0	-1	0.286428
OG0000046	7	1	0	0.699357
OG0000046	Cbn	0	-1	0.381274
OG0000046	8	1	0	0.579948
OG0000046	Cre	0	-1	0.33055
OG0000046	9	12	11	5.28023e-07
OG0000046	Cbr	13	1	0.273055
OG0000046	Cni	12	0	0.766276
OG0000056	Cel	0	-1	0.286428
OG0000056	7	1	0	0.699357
OG0000056	Cbn	0	-1	0.381274
OG0000056	8	1	0	0.579948
OG0000056	Cre	0	-1	0.33055
OG0000056	9	6	5	0.000915963
OG0000056	Cbr	1	-5	1.56323e-06
OG0000056	Cni	18	12	3.29684e-14
OG0000058	Cel	0	-1	0.286428
OG0000058	7	2	1	0.106624
OG0000058	Cbn	3	1	0.316195
OG0000058	8	2	0	0.641265
OG0000058	Cre	0	-2	0.138579
OG0000058	9	8	6	0.00106459
OG0000058	Cbr	19	11	1.20124e-10
OG0000058	Cni	5	-3	0.0017954
OG0000061	Cel	0	-1	0.286428
OG0000061	7	1	0	0.699357
OG0000061	Cbn	0	-1	0.381274
OG0000061	8	1	0	0.579948
OG0000061	Cre	0	-1	0.33055
OG0000061	9	10	9	6.34446e-06
OG0000061	Cbr	5	-5	7.31105e-05
OG0000061	Cni	22	12	1.17908e-12
OG0000062	Cel	0	-1	0.286428
OG0000062	7	5	4	0.00120763
OG0000062	Cbn	1	-4	0.0496496
OG0000062	8	10	5	0.000351914
OG0000062	Cre	32	22	1.85913e-08
OG0000062	9	11	1	0.529402
OG0000062	Cbr	0	-11	9.633e-15
OG0000062	Cni	21	10	4.5067e-10
OG0000067	Cel	0	-1	0.286428
OG0000067	7	1	0	0.699357
OG0000067	Cbn	0	-1	0.381274
OG0000067	8	1	0	0.579948
OG0000067	Cre	0	-1	0.33055
OG0000067	9	8	7	7.62318e-05
OG0000067	Cbr	3	-5	2.53773e-05
OG0000067	Cni	20	12	2.31854e-13
OG0000073	Cel	0	-1	0.286428
OG0000073	7	1	0	0.699357
OG0000073	Cbn	0	-1	0.381274
OG0000073	8	1	0	0.579948
OG0000073	Cre	1	0	0.732372
OG0000073	9	8	7	7.62318e-05
OG0000073	Cbr	12	4	0.00105095
OG0000073	Cni	8	0	0.713116
OG0000077	Cel	0	-1	0.286428
OG0000077	7	2	1	0.106624
OG0000077	Cbn	3	1	0.316195
OG0000077	8	2	0	0.641265
OG0000077	Cre	0	-2	0.138579
OG0000077	9	5	3	0.027625
OG0000077	Cbr	0	-5	4.20353e-07
OG0000077	Cni	14	9	6.59182e-11
OG0000085	Cel	0	-1	0.286428
OG0000085	7	3	2	0.023945
OG0000085	Cbn	2	-1	0.875237
OG0000085	8	5	2	0.0346868
OG0000085	Cre	11	6	0.00707198
OG0000085	9	6	1	0.516029
OG0000085	Cbr	2	-4	0.00010535
OG0000085	Cni	10	4	0.000146518
OG0000094	Cel	0	-1	0.286428
OG0000094	7	1	0	0.699357
OG0000094	Cbn	0	-1	0.381274
OG0000094	8	1	0	0.579948
OG0000094	Cre	1	0	0.732372
OG0000094	9	5	4	0.00317504
OG0000094	Cbr	2	-3	0.000952413
OG0000094	Cni	13	8	1.15311e-09
OG0000095	Cel	0	-1	0.286428
OG0000095	7	1	0	0.699357
OG0000095	Cbn	0	-1	0.381274
OG0000095	8	1	0	0.579948
OG0000095	Cre	1	0	0.732372
OG0000095	9	7	6	0.000264245
OG0000095	Cbr	3	-4	0.000198763
OG0000095	Cni	18	11	1.54753e-12
OG0000103	Cel	0	-1	0.286428
OG0000103	7	1	0	0.699357
OG0000103	Cbn	0	-1	0.381274
OG0000103	8	1	0	0.579948
OG0000103	Cre	0	-1	0.33055
OG0000103	9	8	7	7.62318e-05
OG0000103	Cbr	12	4	0.00105095
OG0000103	Cni	7	-1	0.332873
OG0000108	Cel	0	-1	0.286428
OG0000108	7	2	1	0.106624
OG0000108	Cbn	2	0	0.847751
OG0000108	8	3	1	0.0829844
OG0000108	Cre	4	1	0.364994
OG0000108	9	6	3	0.0698715
OG0000108	Cbr	3	-3	0.00169396
OG0000108	Cni	11	5	9.49216e-06
OG0000116	Cel	0	-1	0.286428
OG0000116	7	1	0	0.699357
OG0000116	Cbn	0	-1	0.381274
OG0000116	8	1	0	0.579948
OG0000116	Cre	0	-1	0.33055
OG0000116	9	4	3	0.0110058
OG0000116	Cbr	1	-3	0.000451102
OG0000116	Cni	10	6	1.34148e-07
OG0000125	Cel	0	-1	0.286428
OG0000125	7	1	0	0.699357
OG0000125	Cbn	0	-1	0.381274
OG0000125	8	1	0	0.579948
OG0000125	Cre	1	0	0.732372
OG0000125	9	3	2	0.0381497
OG0000125	Cbr	5	2	0.0146132
OG0000125	Cni	3	0	0.603929
OG0000128	Cel	0	-1	0.286428
OG0000128	7	1	0	0.699357
OG0000128	Cbn	0	-1	0.381274
OG0000128	8	1	0	0.579948
OG0000128	Cre	0	-1	0.33055
OG0000128	9	3	2	0.0381497
OG0000128	Cbr	0	-3	0.000159346
OG0000128	Cni	10	7	2.43843e-09
OG0000133	Cel	0	-1	0.286428
OG0000133	7	1	0	0.699357
OG0000133	Cbn	2	1	0.145094
OG0000133	8	1	0	0.579948
OG0000133	Cre	0	-1	0.33055
OG0000133	9	5	4	0.00317504
OG0000133	Cbr	1	-4	4.89766e-05
OG0000133	Cni	14	9	6.59182e-11
OG0000147	Cel	0	-1	0.286428
OG0000147	7	1	0	0.699357
OG0000147	Cbn	0	-1	0.381274
OG0000147	8	1	0	0.579948
OG0000147	Cre	0	-1	0.33055
OG0000147	9	7	6	0.000264245
OG0000147	Cbr	11	4	0.000673248
OG0000147	Cni	6	-1	0.304119
OG0000155	Cel	0	-1	0.286428
OG0000155	7	5	4	0.00120763
OG0000155	Cbn	3	-2	0.55004
OG0000155	8	7	2	0.0799243
OG0000155	Cre	37	30	2.06274e-13
OG0000155	9	4	-3	0.236705
OG0000155	Cbr	4	0	0.66267
OG0000155	Cni	3	-1	0.199471
OG0000159	Cel	0	-1	0.286428
OG0000159	7	4	3	0.00537743
OG0000159	Cbn	0	-4	0.0162936
OG0000159	8	8	4	0.000610015
OG0000159	Cre	102	94	2.28077e-46
OG0000159	9	0	-8	6.50446e-05
OG0000159	Cbr	0	0	0.5
OG0000159	Cni	0	0	0.5
OG0000161	Cel	1	0	0.699357
OG0000161	7	4	3	0.00537743
OG0000161	Cbn	5	1	0.501012
OG0000161	8	4	0	0.725871
OG0000161	Cre	7	3	0.102715
OG0000161	9	5	1	0.462419
OG0000161	Cbr	4	-1	0.292965
OG0000161	Cni	7	2	0.0225489
OG0000171	Cel	0	-1	0.286428
OG0000171	7	6	5	0.000271203
OG0000171	Cbn	9	3	0.161269
OG0000171	8	6	0	0.7787
OG0000171	Cre	13	7	0.0038898
OG0000171	9	4	-2	0.411599
OG0000171	Cbr	2	-2	0.00921297
OG0000171	Cni	4	0	0.631047
OG0000185	Cel	2	0	0.788903
OG0000185	7	6	4	0.00409593
OG0000185	Cbn	8	2	0.330148
OG0000185	8	7	1	0.231054
OG0000185	Cre	22	15	2.73559e-06
OG0000185	9	3	-4	0.110861
OG0000185	Cbr	3	0	0.631091
OG0000185	Cni	3	0	0.603929
OG0000188	Cel	0	-1	0.286428
OG0000188	7	1	0	0.699357
OG0000188	Cbn	2	1	0.145094
OG0000188	8	1	0	0.579948
OG0000188	Cre	0	-1	0.33055
OG0000188	9	3	2	0.0381497
OG0000188	Cbr	2	-1	0.198727
OG0000188	Cni	6	3	0.000340283
OG0000193	Cel	0	-2	0.0487552
OG0000193	7	13	11	2.64427e-07
OG0000193	Cbn	76	63	2.89138e-22
OG0000193	8	12	-1	0.611792
OG0000193	Cre	18	6	0.0513939
OG0000193	9	0	-12	4.59233e-07
OG0000193	Cbr	0	0	0.5
OG0000193	Cni	0	0	0.5
OG0000209	Cel	2	0	0.788903
OG0000209	7	3	1	0.219736
OG0000209	Cbn	2	-1	0.875237
OG0000209	8	4	1	0.123322
OG0000209	Cre	6	2	0.172626
OG0000209	9	5	1	0.462419
OG0000209	Cbr	1	-4	4.89766e-05
OG0000209	Cni	9	4	7.90763e-05
OG0000218	Cel	1	0	0.699357
OG0000218	7	3	2	0.023945
OG0000218	Cbn	1	-2	0.275079
OG0000218	8	4	1	0.123322
OG0000218	Cre	11	7	0.00126215
OG0000218	9	4	0	0.885809
OG0000218	Cbr	3	-1	0.248886
OG0000218	Cni	5	1	0.0788071
OG0000219	Cel	85	80	1.60723e-47
OG0000219	7	2	-3	0.0600074
OG0000219	Cbn	1	-1	0.547436
OG0000219	8	2	0	0.641265
OG0000219	Cre	2	0	0.818195
OG0000219	9	0	-2	0.153559
OG0000219	Cbr	0	0	0.5
OG0000219	Cni	0	0	0.5
OG0000235	Cel	0	-1	0.286428
OG0000235	7	1	0	0.699357
OG0000235	Cbn	1	0	0.77171
OG0000235	8	1	0	0.579948
OG0000235	Cre	0	-1	0.33055
OG0000235	9	4	3	0.0110058
OG0000235	Cbr	2	-2	0.00921297
OG0000235	Cni	8	4	3.84209e-05
OG0000262	Cel	0	-1	0.286428
OG0000262	7	2	1	0.106624
OG0000262	Cbn	1	-1	0.547436
OG0000262	8	2	0	0.641265
OG0000262	Cre	5	3	0.0232744
OG0000262	9	3	1	0.281262
OG0000262	Cbr	0	-3	0.000159346
OG0000262	Cni	7	4	1.64054e-05
OG0000287	Cel	0	-1	0.286428
OG0000287	7	1	0	0.699357
OG0000287	Cbn	2	1	0.145094
OG0000287	8	1	0	0.579948
OG0000287	Cre	0	-1	0.33055
OG0000287	9	4	3	0.0110058
OG0000287	Cbr	1	-3	0.000451102
OG0000287	Cni	11	7	7.57913e-09
OG0000300	Cel	0	-1	0.286428
OG0000300	7	1	0	0.699357
OG0000300	Cbn	1	0	0.77171
OG0000300	8	1	0	0.579948
OG0000300	Cre	0	-1	0.33055
OG0000300	9	4	3	0.0110058
OG0000300	Cbr	10	6	6.51251e-07
OG0000300	Cni	3	-1	0.199471
OG0000306	Cel	0	-1	0.286428
OG0000306	7	1	0	0.699357
OG0000306	Cbn	0	-1	0.381274
OG0000306	8	1	0	0.579948
OG0000306	Cre	0	-1	0.33055
OG0000306	9	3	2	0.0381497
OG0000306	Cbr	2	-1	0.198727
OG0000306	Cni	5	2	0.00867892
OG0000316	Cel	0	-1	0.286428
OG0000316	7	6	5	0.000271203
OG0000316	Cbn	4	-2	0.587348
OG0000316	8	8	2	0.103959
OG0000316	Cre	67	59	1.08981e-27
OG0000316	9	0	-8	6.50446e-05
OG0000316	Cbr	0	0	0.5
OG0000316	Cni	0	0	0.5
OG0000322	Cel	0	-1	0.286428
OG0000322	7	1	0	0.699357
OG0000322	Cbn	0	-1	0.381274
OG0000322	8	1	0	0.579948
OG0000322	Cre	0	-1	0.33055
OG0000322	9	3	2	0.0381497
OG0000322	Cbr	0	-3	0.000159346
OG0000322	Cni	9	6	4.78794e-08
OG0000326	Cel	0	-1	0.286428
OG0000326	7	1	0	0.699357
OG0000326	Cbn	0	-1	0.381274
OG0000326	8	1	0	0.579948
OG0000326	Cre	1	0	0.732372
OG0000326	9	3	2	0.0381497
OG0000326	Cbr	1	-2	0.0049533
OG0000326	Cni	8	5	9.07447e-07
OG0000339	Cel	0	-1	0.286428
OG0000339	7	3	2	0.023945
OG0000339	Cbn	16	13	5.20688e-06
OG0000339	8	3	0	0.688739
OG0000339	Cre	2	-1	0.583634
OG0000339	9	2	-1	0.602621
OG0000339	Cbr	1	-1	0.14142
OG0000339	Cni	3	1	0.0396742
OG0000356	Cel	0	-1	0.286428
OG0000356	7	1	0	0.699357
OG0000356	Cbn	0	-1	0.381274
OG0000356	8	2	1	0.0414236
OG0000356	Cre	2	0	0.818195
OG0000356	9	4	2	0.0764445
OG0000356	Cbr	3	-1	0.248886
OG0000356	Cni	5	1	0.0788071
OG0000383	Cel	0	-1	0.286428
OG0000383	7	1	0	0.699357
OG0000383	Cbn	1	0	0.77171
OG0000383	8	1	0	0.579948
OG0000383	Cre	0	-1	0.33055
OG0000383	9	3	2	0.0381497
OG0000383	Cbr	0	-3	0.000159346
OG0000383	Cni	8	5	9.07447e-07
OG0000384	Cel	0	-1	0.286428
OG0000384	7	5	4	0.00120763
OG0000384	Cbn	4	-1	0.90443
OG0000384	8	7	2	0.0799243
OG0000384	Cre	59	52	1.03339e-24
OG0000384	9	0	-7	0.000226978
OG0000384	Cbr	0	0	0.5
OG0000384	Cni	0	0	0.5
OG0000395	Cel	0	-1	0.286428
OG0000395	7	1	0	0.699357
OG0000395	Cbn	0	-1	0.381274
OG0000395	8	1	0	0.579948
OG0000395	Cre	0	-1	0.33055
OG0000395	9	3	2	0.0381497
OG0000395	Cbr	2	-1	0.198727
OG0000395	Cni	6	3	0.000340283
OG0000403	Cel	0	-1	0.286428
OG0000403	7	1	0	0.699357
OG0000403	Cbn	1	0	0.77171
OG0000403	8	1	0	0.579948
OG0000403	Cre	0	-1	0.33055
OG0000403	9	5	4	0.00317504
OG0000403	Cbr	3	-2	0.0144601
OG0000403	Cni	9	4	7.90763e-05
OG0000414	Cel	0	-1	0.286428
OG0000414	7	1	0	0.699357
OG0000414	Cbn	0	-1	0.381274
OG0000414	8	1	0	0.579948
OG0000414	Cre	0	-1	0.33055
OG0000414	9	3	2	0.0381497
OG0000414	Cbr	0	-3	0.000159346
OG0000414	Cni	8	5	9.07447e-07
OG0000416	Cel	61	57	3.9225e-34
OG0000416	7	0	-4	0.00361974
OG0000416	Cbn	0	0	0.5
OG0000416	8	0	0	0.5
OG0000416	Cre	0	0	0.5
OG0000416	9	0	0	0.5
OG0000416	Cbr	0	0	0.5
OG0000416	Cni	0	0	0.5
OG0000430	Cel	0	-1	0.286428
OG0000430	7	1	0	0.699357
OG0000430	Cbn	0	-1	0.381274
OG0000430	8	1	0	0.579948
OG0000430	Cre	0	-1	0.33055
OG0000430	9	3	2	0.0381497
OG0000430	Cbr	1	-2	0.0049533
OG0000430	Cni	6	3	0.000340283
OG0000469	Cel	0	-1	0.286428
OG0000469	7	1	0	0.699357
OG0000469	Cbn	0	-1	0.381274
OG0000469	8	1	0	0.579948
OG0000469	Cre	0	-1	0.33055
OG0000469	9	3	2	0.0381497
OG0000469	Cbr	2	-1	0.198727
OG0000469	Cni	4	1	0.0593716
OG0000478	Cel	0	-1	0.286428
OG0000478	7	2	1	0.106624
OG0000478	Cbn	0	-2	0.180437
OG0000478	8	4	2	0.016206
OG0000478	Cre	57	53	1.11192e-27
OG0000478	9	0	-4	0.0102679
OG0000478	Cbr	0	0	0.5
OG0000478	Cni	0	0	0.5
OG0000489	Cel	0	-1	0.286428
OG0000489	7	1	0	0.699357
OG0000489	Cbn	0	-1	0.381274
OG0000489	8	1	0	0.579948
OG0000489	Cre	2	1	0.124528
OG0000489	9	3	2	0.0381497
OG0000489	Cbr	2	-1	0.198727
OG0000489	Cni	4	1	0.0593716
OG0000516	Cel	1	-1	0.442773
OG0000516	7	5	3	0.0150053
OG0000516	Cbn	6	1	0.403388
OG0000516	8	6	1	0.197623
OG0000516	Cre	17	11	7.9365e-05
OG0000516	9	3	-3	0.200767
OG0000516	Cbr	1	-2	0.0049533
OG0000516	Cni	3	0	0.603929
OG0000548	Cel	0	-1	0.286428
OG0000548	7	1	0	0.699357
OG0000548	Cbn	0	-1	0.381274
OG0000548	8	1	0	0.579948
OG0000548	Cre	0	-1	0.33055
OG0000548	9	2	1	0.13224
OG0000548	Cbr	0	-2	0.00186062
OG0000548	Cni	4	2	0.00381859
OG0000619	Cel	0	-1	0.286428
OG0000619	7	1	0	0.699357
OG0000619	Cbn	0	-1	0.381274
OG0000619	8	1	0	0.579948
OG0000619	Cre	0	-1	0.33055
OG0000619	9	3	2	0.0381497
OG0000619	Cbr	2	-1	0.198727
OG0000619	Cni	4	1	0.0593716
OG0000631	Cel	0	-1	0.286428
OG0000631	7	1	0	0.699357
OG0000631	Cbn	0	-1	0.381274
OG0000631	8	1	0	0.579948
OG0000631	Cre	0	-1	0.33055
OG0000631	9	3	2	0.0381497
OG0000631	Cbr	0	-3	0.000159346
OG0000631	Cni	9	6	4.78794e-08
OG0000652	Cel	1	0	0.699357
OG0000652	7	3	2	0.023945
OG0000652	Cbn	3	0	0.629539
OG0000652	8	3	0	0.688739
OG0000652	Cre	9	6	0.00180633
OG0000652	9	2	-1	0.602621
OG0000652	Cbr	0	-2	0.00186062
OG0000652	Cni	3	1	0.0396742
OG0000655	Cel	0	-1	0.286428
OG0000655	7	2	1	0.106624
OG0000655	Cbn	0	-2	0.180437
OG0000655	8	4	2	0.016206
OG0000655	Cre	48	44	9.11169e-23
OG0000655	9	0	-4	0.0102679
OG0000655	Cbr	0	0	0.5
OG0000655	Cni	0	0	0.5
OG0000657	Cel	0	-1	0.286428
OG0000657	7	1	0	0.699357
OG0000657	Cbn	0	-1	0.381274
OG0000657	8	1	0	0.579948
OG0000657	Cre	0	-1	0.33055
OG0000657	9	2	1	0.13224
OG0000657	Cbr	0	-2	0.00186062
OG0000657	Cni	6	4	5.82977e-06
OG0000671	Cel	0	-1	0.286428
OG0000671	7	1	0	0.699357
OG0000671	Cbn	0	-1	0.381274
OG0000671	8	1	0	0.579948
OG0000671	Cre	0	-1	0.33055
OG0000671	9	3	2	0.0381497
OG0000671	Cbr	1	-2	0.0049533
OG0000671	Cni	6	3	0.000340283
OG0000685	Cel	3	0	0.834309
OG0000685	7	7	4	0.00856847
OG0000685	Cbn	8	1	0.483674
OG0000685	8	8	1	0.261967
OG0000685	Cre	36	28	5.84617e-12
OG0000685	9	0	-8	6.50446e-05
OG0000685	Cbr	0	0	0.5
OG0000685	Cni	0	0	0.5
OG0000686	Cel	46	42	8.85326e-25
OG0000686	7	1	-3	0.0374982
OG0000686	Cbn	0	-1	0.381274
OG0000686	8	1	0	0.579948
OG0000686	Cre	1	0	0.732372
OG0000686	9	0	-1	0.349508
OG0000686	Cbr	0	0	0.5
OG0000686	Cni	0	0	0.5
OG0000693	Cel	0	-1	0.286428
OG0000693	7	2	1	0.106624
OG0000693	Cbn	2	0	0.847751
OG0000693	8	3	1	0.0829844
OG0000693	Cre	7	4	0.0147554
OG0000693	9	3	0	0.865879
OG0000693	Cbr	2	-1	0.198727
OG0000693	Cni	3	0	0.603929
OG0000777	Cel	0	-1	0.286428
OG0000777	7	7	6	6.09051e-05
OG0000777	Cbn	11	4	0.0947312
OG0000777	8	8	1	0.261967
OG0000777	Cre	33	25	1.5794e-10
OG0000777	9	0	-8	6.50446e-05
OG0000777	Cbr	0	0	0.5
OG0000777	Cni	0	0	0.5
OG0000810	Cel	0	-1	0.286428
OG0000810	7	1	0	0.699357
OG0000810	Cbn	0	-1	0.381274
OG0000810	8	1	0	0.579948
OG0000810	Cre	1	0	0.732372
OG0000810	9	2	1	0.13224
OG0000810	Cbr	0	-2	0.00186062
OG0000810	Cni	4	2	0.00381859
OG0000825	Cel	0	-1	0.286428
OG0000825	7	1	0	0.699357
OG0000825	Cbn	0	-1	0.381274
OG0000825	8	1	0	0.579948
OG0000825	Cre	0	-1	0.33055
OG0000825	9	3	2	0.0381497
OG0000825	Cbr	2	-1	0.198727
OG0000825	Cni	4	1	0.0593716
OG0000839	Cel	0	-1	0.286428
OG0000839	7	1	0	0.699357
OG0000839	Cbn	1	0	0.77171
OG0000839	8	1	0	0.579948
OG0000839	Cre	0	-1	0.33055
OG0000839	9	2	1	0.13224
OG0000839	Cbr	1	-1	0.14142
OG0000839	Cni	3	1	0.0396742
OG0000841	Cel	0	-1	0.286428
OG0000841	7	2	1	0.106624
OG0000841	Cbn	42	40	2.35994e-19
OG0000841	8	1	-1	0.212442
OG0000841	Cre	0	-1	0.33055
OG0000841	9	0	-1	0.349508
OG0000841	Cbr	0	0	0.5
OG0000841	Cni	0	0	0.5
OG0000842	Cel	3	1	0.219736
OG0000842	7	2	0	0.788903
OG0000842	Cbn	3	1	0.316195
OG0000842	8	2	0	0.641265
OG0000842	Cre	1	-1	0.492733
OG0000842	9	2	0	0.829724
OG0000842	Cbr	0	-2	0.00186062
OG0000842	Cni	3	1	0.0396742
OG0000873	Cel	1	0	0.699357
OG0000873	7	3	2	0.023945
OG0000873	Cbn	5	2	0.158395
OG0000873	8	3	0	0.688739
OG0000873	Cre	8	5	0.00525267
OG0000873	9	2	-1	0.602621
OG0000873	Cbr	1	-1	0.14142
OG0000873	Cni	2	0	0.573393
OG0000893	Cel	0	-1	0.286428
OG0000893	7	1	0	0.699357
OG0000893	Cbn	0	-1	0.381274
OG0000893	8	1	0	0.579948
OG0000893	Cre	1	0	0.732372
OG0000893	9	2	1	0.13224
OG0000893	Cbr	0	-2	0.00186062
OG0000893	Cni	5	3	0.000117868
OG0000943	Cel	1	0	0.699357
OG0000943	7	3	2	0.023945
OG0000943	Cbn	2	-1	0.875237
OG0000943	8	4	1	0.123322
OG0000943	Cre	37	33	7.89123e-17
OG0000943	9	0	-4	0.0102679
OG0000943	Cbr	0	0	0.5
OG0000943	Cni	0	0	0.5
OG0000946	Cel	0	-1	0.286428
OG0000946	7	2	1	0.106624
OG0000946	Cbn	0	-2	0.180437
OG0000946	8	3	1	0.0829844
OG0000946	Cre	40	37	7.58288e-20
OG0000946	9	0	-3	0.0383238
OG0000946	Cbr	0	0	0.5
OG0000946	Cni	0	0	0.5
OG0001008	Cel	0	-1	0.286428
OG0001008	7	2	1	0.106624
OG0001008	Cbn	6	4	0.0139751
OG0001008	8	2	0	0.641265
OG0001008	Cre	1	-1	0.492733
OG0001008	9	2	0	0.829724
OG0001008	Cbr	0	-2	0.00186062
OG0001008	Cni	3	1	0.0396742
OG0001024	Cel	0	-1	0.286428
OG0001024	7	3	2	0.023945
OG0001024	Cbn	7	4	0.0252762
OG0001024	8	3	0	0.688739
OG0001024	Cre	5	2	0.119191
OG0001024	9	2	-1	0.602621
OG0001024	Cbr	1	-1	0.14142
OG0001024	Cni	3	1	0.0396742
OG0001087	Cel	0	-1	0.286428
OG0001087	7	2	1	0.106624
OG0001087	Cbn	0	-2	0.180437
OG0001087	8	3	1	0.0829844
OG0001087	Cre	38	35	9.4881e-19
OG0001087	9	0	-3	0.0383238
OG0001087	Cbr	0	0	0.5
OG0001087	Cni	0	0	0.5
OG0001089	Cel	0	-1	0.286428
OG0001089	7	1	0	0.699357
OG0001089	Cbn	0	-1	0.381274
OG0001089	8	1	0	0.579948
OG0001089	Cre	0	-1	0.33055
OG0001089	9	2	1	0.13224
OG0001089	Cbr	0	-2	0.00186062
OG0001089	Cni	4	2	0.00381859
OG0001184	Cel	0	-1	0.286428
OG0001184	7	1	0	0.699357
OG0001184	Cbn	0	-1	0.381274
OG0001184	8	1	0	0.579948
OG0001184	Cre	0	-1	0.33055
OG0001184	9	2	1	0.13224
OG0001184	Cbr	0	-2	0.00186062
OG0001184	Cni	4	2	0.00381859
OG0001185	Cel	0	-1	0.286428
OG0001185	7	1	0	0.699357
OG0001185	Cbn	0	-1	0.381274
OG0001185	8	1	0	0.579948
OG0001185	Cre	0	-1	0.33055
OG0001185	9	2	1	0.13224
OG0001185	Cbr	0	-2	0.00186062
OG0001185	Cni	6	4	5.82977e-06
OG0001200	Cel	0	-1	0.286428
OG0001200	7	1	0	0.699357
OG0001200	Cbn	0	-1	0.381274
OG0001200	8	1	0	0.579948
OG0001200	Cre	0	-1	0.33055
OG0001200	9	2	1	0.13224
OG0001200	Cbr	1	-1	0.14142
OG0001200	Cni	3	1	0.0396742
OG0001276	Cel	0	-1	0.286428
OG0001276	7	2	1	0.106624
OG0001276	Cbn	36	34	1.74039e-16
OG0001276	8	1	-1	0.212442
OG0001276	Cre	0	-1	0.33055
OG0001276	9	0	-1	0.349508
OG0001276	Cbr	0	0	0.5
OG0001276	Cni	0	0	0.5
OG0001279	Cel	0	-1	0.286428
OG0001279	7	1	0	0.699357
OG0001279	Cbn	1	0	0.77171
OG0001279	8	1	0	0.579948
OG0001279	Cre	0	-1	0.33055
OG0001279	9	2	1	0.13224
OG0001279	Cbr	0	-2	0.00186062
OG0001279	Cni	5	3	0.000117868
OG0001282	Cel	36	33	4.19148e-20
OG0001282	7	0	-3	0.0188018
OG0001282	Cbn	0	0	0.5
OG0001282	8	0	0	0.5
OG0001282	Cre	0	0	0.5
OG0001282	9	0	0	0.5
OG0001282	Cbr	0	0	0.5
OG0001282	Cni	0	0	0.5
OG0001365	Cel	0	-1	0.286428
OG0001365	7	3	2	0.023945
OG0001365	Cbn	33	30	1.07678e-13
OG0001365	8	2	-1	0.288425
OG0001365	Cre	2	0	0.818195
OG0001365	9	0	-2	0.153559
OG0001365	Cbr	0	0	0.5
OG0001365	Cni	0	0	0.5
OG0001413	Cel	0	-1	0.286428
OG0001413	7	1	0	0.699357
OG0001413	Cbn	0	-1	0.381274
OG0001413	8	1	0	0.579948
OG0001413	Cre	0	-1	0.33055
OG0001413	9	2	1	0.13224
OG0001413	Cbr	1	-1	0.14142
OG0001413	Cni	4	2	0.00381859
OG0001439	Cel	0	-1	0.286428
OG0001439	7	1	0	0.699357
OG0001439	Cbn	0	-1	0.381274
OG0001439	8	1	0	0.579948
OG0001439	Cre	0	-1	0.33055
OG0001439	9	2	1	0.13224
OG0001439	Cbr	1	-1	0.14142
OG0001439	Cni	3	1	0.0396742
OG0001531	Cel	0	-1	0.286428
OG0001531	7	1	0	0.699357
OG0001531	Cbn	3	2	0.0470531
OG0001531	8	1	0	0.579948
OG0001531	Cre	0	-1	0.33055
OG0001531	9	2	1	0.13224
OG0001531	Cbr	0	-2	0.00186062
OG0001531	Cni	4	2	0.00381859
OG0001536	Cel	0	-1	0.286428
OG0001536	7	2	1	0.106624
OG0001536	Cbn	0	-2	0.180437
OG0001536	8	3	1	0.0829844
OG0001536	Cre	33	30	5.11782e-16
OG0001536	9	0	-3	0.0383238
OG0001536	Cbr	0	0	0.5
OG0001536	Cni	0	0	0.5
OG0001547	Cel	1	0	0.699357
OG0001547	7	2	1	0.106624
OG0001547	Cbn	1	-1	0.547436
OG0001547	8	2	0	0.641265
OG0001547	Cre	14	12	4.80388e-07
OG0001547	9	1	-1	0.5134
OG0001547	Cbr	1	0	0.550914
OG0001547	Cni	1	0	0.53894
OG0001801	Cel	0	-1	0.286428
OG0001801	7	1	0	0.699357
OG0001801	Cbn	1	0	0.77171
OG0001801	8	1	0	0.579948
OG0001801	Cre	0	-1	0.33055
OG0001801	9	1	0	0.746876
OG0001801	Cbr	0	-1	0.0756875
OG0001801	Cni	3	2	0.000787977
OG0001905	Cel	0	-1	0.286428
OG0001905	7	2	1	0.106624
OG0001905	Cbn	1	-1	0.547436
OG0001905	8	3	1	0.0829844
OG0001905	Cre	28	25	2.63153e-13
OG0001905	9	0	-3	0.0383238
OG0001905	Cbr	0	0	0.5
OG0001905	Cni	0	0	0.5
OG0001916	Cel	0	-1	0.286428
OG0001916	7	1	0	0.699357
OG0001916	Cbn	0	-1	0.381274
OG0001916	8	1	0	0.579948
OG0001916	Cre	0	-1	0.33055
OG0001916	9	2	1	0.13224
OG0001916	Cbr	0	-2	0.00186062
OG0001916	Cni	4	2	0.00381859
OG0002038	Cel	0	-1	0.286428
OG0002038	7	2	1	0.106624
OG0002038	Cbn	1	-1	0.547436
OG0002038	8	3	1	0.0829844
OG0002038	Cre	27	24	9.1051e-13
OG0002038	9	0	-3	0.0383238
OG0002038	Cbr	0	0	0.5
OG0002038	Cni	0	0	0.5
OG0002169	Cel	0	-1	0.286428
OG0002169	7	1	0	0.699357
OG0002169	Cbn	0	-1	0.381274
OG0002169	8	2	1	0.0414236
OG0002169	Cre	26	24	1.25254e-13
OG0002169	9	0	-2	0.153559
OG0002169	Cbr	0	0	0.5
OG0002169	Cni	0	0	0.5
OG0002180	Cel	27	24	1.59955e-14
OG0002180	7	0	-3	0.0188018
OG0002180	Cbn	0	0	0.5
OG0002180	8	0	0	0.5
OG0002180	Cre	0	0	0.5
OG0002180	9	0	0	0.5
OG0002180	Cbr	0	0	0.5
OG0002180	Cni	0	0	0.5
OG0002317	Cel	0	-1	0.286428
OG0002317	7	1	0	0.699357
OG0002317	Cbn	0	-1	0.381274
OG0002317	8	1	0	0.579948
OG0002317	Cre	0	-1	0.33055
OG0002317	9	2	1	0.13224
OG0002317	Cbr	0	-2	0.00186062
OG0002317	Cni	4	2	0.00381859
OG0002321	Cel	0	-1	0.286428
OG0002321	7	1	0	0.699357
OG0002321	Cbn	0	-1	0.381274
OG0002321	8	1	0	0.579948
OG0002321	Cre	0	-1	0.33055
OG0002321	9	1	0	0.746876
OG0002321	Cbr	0	-1	0.0756875
OG0002321	Cni	3	2	0.000787977
OG0002482	Cel	0	-1	0.286428
OG0002482	7	1	0	0.699357
OG0002482	Cbn	0	-1	0.381274
OG0002482	8	2	1	0.0414236
OG0002482	Cre	25	23	4.48634e-13
OG0002482	9	0	-2	0.153559
OG0002482	Cbr	0	0	0.5
OG0002482	Cni	0	0	0.5
OG0002490	Cel	0	-1	0.286428
OG0002490	7	1	0	0.699357
OG0002490	Cbn	0	-1	0.381274
OG0002490	8	1	0	0.579948
OG0002490	Cre	0	-1	0.33055
OG0002490	9	1	0	0.746876
OG0002490	Cbr	0	-1	0.0756875
OG0002490	Cni	3	2	0.000787977
OG0002708	Cel	0	-1	0.286428
OG0002708	7	1	0	0.699357
OG0002708	Cbn	2	1	0.145094
OG0002708	8	1	0	0.579948
OG0002708	Cre	0	-1	0.33055
OG0002708	9	1	0	0.746876
OG0002708	Cbr	0	-1	0.0756875
OG0002708	Cni	2	1	0.0198335
OG0002714	Cel	0	-1	0.286428
OG0002714	7	1	0	0.699357
OG0002714	Cbn	0	-1	0.381274
OG0002714	8	2	1	0.0414236
OG0002714	Cre	24	22	1.60432e-12
OG0002714	9	0	-2	0.153559
OG0002714	Cbr	0	0	0.5
OG0002714	Cni	0	0	0.5
OG0002727	Cel	24	22	3.62369e-14
OG0002727	7	0	-2	0.0487552
OG0002727	Cbn	0	0	0.5
OG0002727	8	0	0	0.5
OG0002727	Cre	0	0	0.5
OG0002727	9	0	0	0.5
OG0002727	Cbr	0	0	0.5
OG0002727	Cni	0	0	0.5
OG0002979	Cel	0	-1	0.286428
OG0002979	7	1	0	0.699357
OG0002979	Cbn	23	22	7.78651e-12
OG0002979	8	0	-1	0.118181
OG0002979	Cre	0	0	0.5
OG0002979	9	0	0	0.5
OG0002979	Cbr	0	0	0.5
OG0002979	Cni	0	0	0.5
OG0002982	Cel	0	-1	0.286428
OG0002982	7	4	3	0.00537743
OG0002982	Cbn	5	1	0.501012
OG0002982	8	4	0	0.725871
OG0002982	Cre	18	14	6.03445e-07
OG0002982	9	0	-4	0.0102679
OG0002982	Cbr	0	0	0.5
OG0002982	Cni	0	0	0.5
OG0003012	Cel	23	21	1.54533e-13
OG0003012	7	0	-2	0.0487552
OG0003012	Cbn	0	0	0.5
OG0003012	8	0	0	0.5
OG0003012	Cre	0	0	0.5
OG0003012	9	0	0	0.5
OG0003012	Cbr	0	0	0.5
OG0003012	Cni	0	0	0.5
OG0003488	Cel	0	-1	0.286428
OG0003488	7	2	1	0.106624
OG0003488	Cbn	21	19	2.20843e-09
OG0003488	8	1	-1	0.212442
OG0003488	Cre	1	0	0.732372
OG0003488	9	0	-1	0.349508
OG0003488	Cbr	0	0	0.5
OG0003488	Cni	0	0	0.5
OG0003499	Cel	0	-1	0.286428
OG0003499	7	1	0	0.699357
OG0003499	Cbn	0	-1	0.381274
OG0003499	8	2	1	0.0414236
OG0003499	Cre	22	20	2.04044e-11
OG0003499	9	0	-2	0.153559
OG0003499	Cbr	0	0	0.5
OG0003499	Cni	0	0	0.5
OG0003501	Cel	0	-1	0.286428
OG0003501	7	1	0	0.699357
OG0003501	Cbn	0	-1	0.381274
OG0003501	8	2	1	0.0414236
OG0003501	Cre	22	20	2.04044e-11
OG0003501	9	0	-2	0.153559
OG0003501	Cbr	0	0	0.5
OG0003501	Cni	0	0	0.5
OG0004614	Cel	0	-1	0.286428
OG0004614	7	2	1	0.106624
OG0004614	Cbn	2	0	0.847751
OG0004614	8	2	0	0.641265
OG0004614	Cre	19	17	9.10516e-10
OG0004614	9	0	-2	0.153559
OG0004614	Cbr	0	0	0.5
OG0004614	Cni	0	0	0.5
OG0004626	Cel	0	-1	0.286428
OG0004626	7	1	0	0.699357
OG0004626	Cbn	0	-1	0.381274
OG0004626	8	1	0	0.579948
OG0004626	Cre	21	20	1.74485e-12
OG0004626	9	0	-1	0.349508
OG0004626	Cbr	0	0	0.5
OG0004626	Cni	0	0	0.5
OG0008138	Cel	0	-1	0.286428
OG0008138	7	1	0	0.699357
OG0008138	Cbn	20	19	2.28312e-10
OG0008138	8	0	-1	0.118181
OG0008138	Cre	0	0	0.5
OG0008138	9	0	0	0.5
OG0008138	Cbr	0	0	0.5
OG0008138	Cni	0	0	0.5
OG0008160	Cel	0	-1	0.286428
OG0008160	7	1	0	0.699357
OG0008160	Cbn	0	-1	0.381274
OG0008160	8	1	0	0.579948
OG0008160	Cre	20	19	6.50122e-12
OG0008160	9	0	-1	0.349508
OG0008160	Cbr	0	0	0.5
OG0008160	Cni	0	0	0.5
OG0008164	Cel	0	-1	0.286428
OG0008164	7	1	0	0.699357
OG0008164	Cbn	0	-1	0.381274
OG0008164	8	1	0	0.579948
OG0008164	Cre	20	19	6.50122e-12
OG0008164	9	0	-1	0.349508
OG0008164	Cbr	0	0	0.5
OG0008164	Cni	0	0	0.5
OG0013666	Cel	0	-1	0.286428
OG0013666	7	3	2	0.023945
OG0013666	Cbn	5	2	0.158395
OG0013666	8	3	0	0.688739
OG0013666	Cre	13	10	2.01808e-05
OG0013666	9	1	-2	0.23958
OG0013666	Cbr	0	-1	0.0756875
OG0013666	Cni	1	0	0.53894
OG0013712	Cel	0	-1	0.286428
OG0013712	7	1	0	0.699357
OG0013712	Cbn	0	-1	0.381274
OG0013712	8	1	0	0.579948
OG0013712	Cre	0	-1	0.33055
OG0013712	9	1	0	0.746876
OG0013712	Cbr	0	-1	0.0756875
OG0013712	Cni	2	1	0.0198335
OG0013714	Cel	0	-1	0.286428
OG0013714	7	1	0	0.699357
OG0013714	Cbn	0	-1	0.381274
OG0013714	8	1	0	0.579948
OG0013714	Cre	0	-1	0.33055
OG0013714	9	1	0	0.746876
OG0013714	Cbr	0	-1	0.0756875
OG0013714	Cni	2	1	0.0198335
OG0015400	Cel	0	-1	0.286428
OG0015400	7	1	0	0.699357
OG0015400	Cbn	0	-1	0.381274
OG0015400	8	1	0	0.579948
OG0015400	Cre	18	17	9.02547e-11
OG0015400	9	0	-1	0.349508
OG0015400	Cbr	0	0	0.5
OG0015400	Cni	0	0	0.5
OG0015401	Cel	0	-1	0.286428
OG0015401	7	1	0	0.699357
OG0015401	Cbn	0	-1	0.381274
OG0015401	8	1	0	0.579948
OG0015401	Cre	18	17	9.02547e-11
OG0015401	9	0	-1	0.349508
OG0015401	Cbr	0	0	0.5
OG0015401	Cni	0	0	0.5
OG0015402	Cel	0	-1	0.286428
OG0015402	7	1	0	0.699357
OG0015402	Cbn	0	-1	0.381274
OG0015402	8	1	0	0.579948
OG0015402	Cre	18	17	9.02547e-11
OG0015402	9	0	-1	0.349508
OG0015402	Cbr	0	0	0.5
OG0015402	Cni	0	0	0.5
OG0015404	Cel	0	-1	0.286428
OG0015404	7	1	0	0.699357
OG0015404	Cbn	0	-1	0.381274
OG0015404	8	1	0	0.579948
OG0015404	Cre	1	0	0.732372
OG0015404	9	1	0	0.746876
OG0015404	Cbr	0	-1	0.0756875
OG0015404	Cni	2	1	0.0198335
OG0015414	Cel	0	-1	0.286428
OG0015414	7	1	0	0.699357
OG0015414	Cbn	0	-1	0.381274
OG0015414	8	1	0	0.579948
OG0015414	Cre	7	6	0.000173412
OG0015414	9	1	0	0.746876
OG0015414	Cbr	0	-1	0.0756875
OG0015414	Cni	1	0	0.53894
OG0015457	Cel	0	-1	0.286428
OG0015457	7	1	0	0.699357
OG0015457	Cbn	0	-1	0.381274
OG0015457	8	1	0	0.579948
OG0015457	Cre	0	-1	0.33055
OG0015457	9	1	0	0.746876
OG0015457	Cbr	0	-1	0.0756875
OG0015457	Cni	2	1	0.0198335
OG0015473	Cel	0	-1	0.286428
OG0015473	7	1	0	0.699357
OG0015473	Cbn	0	-1	0.381274
OG0015473	8	1	0	0.579948
OG0015473	Cre	0	-1	0.33055
OG0015473	9	2	1	0.13224
OG0015473	Cbr	4	2	0.00654138
OG0015473	Cni	1	-1	0.11015
OG0016281	Cel	0	-1	0.286428
OG0016281	7	1	0	0.699357
OG0016281	Cbn	0	-1	0.381274
OG0016281	8	1	0	0.579948
OG0016281	Cre	0	-1	0.33055
OG0016281	9	1	0	0.746876
OG0016281	Cbr	0	-1	0.0756875
OG0016281	Cni	2	1	0.0198335
OG0016296	Cel	0	-1	0.286428
OG0016296	7	1	0	0.699357
OG0016296	Cbn	0	-1	0.381274
OG0016296	8	1	0	0.579948
OG0016296	Cre	0	-1	0.33055
OG0016296	9	1	0	0.746876
OG0016296	Cbr	0	-1	0.0756875
OG0016296	Cni	2	1	0.0198335
OG0016309	Cel	0	-1	0.286428
OG0016309	7	1	0	0.699357
OG0016309	Cbn	0	-1	0.381274
OG0016309	8	1	0	0.579948
OG0016309	Cre	0	-1	0.33055
OG0016309	9	1	0	0.746876
OG0016309	Cbr	0	-1	0.0756875
OG0016309	Cni	2	1	0.0198335
OG0017245	Cel	0	-1	0.286428
OG0017245	7	2	1	0.106624
OG0017245	Cbn	1	-1	0.547436
OG0017245	8	3	1	0.0829844
OG0017245	Cre	10	7	0.000604565
OG0017245	9	3	0	0.865879
OG0017245	Cbr	0	-3	0.000159346
OG0017245	Cni	5	2	0.00867892
OG0017320	Cel	0	-1	0.286428
OG0017320	7	1	0	0.699357
OG0017320	Cbn	0	-1	0.381274
OG0017320	8	1	0	0.579948
OG0017320	Cre	0	-1	0.33055
OG0017320	9	2	1	0.13224
OG0017320	Cbr	0	-2	0.00186062
OG0017320	Cni	4	2	0.00381859
OG0017332	Cel	0	-1	0.286428
OG0017332	7	1	0	0.699357
OG0017332	Cbn	0	-1	0.381274
OG0017332	8	1	0	0.579948
OG0017332	Cre	0	-1	0.33055
OG0017332	9	1	0	0.746876
OG0017332	Cbr	0	-1	0.0756875
OG0017332	Cni	2	1	0.0198335
OG0017333	Cel	0	-1	0.286428
OG0017333	7	1	0	0.699357
OG0017333	Cbn	0	-1	0.381274
OG0017333	8	1	0	0.579948
OG0017333	Cre	0	-1	0.33055
OG0017333	9	1	0	0.746876
OG0017333	Cbr	0	-1	0.0756875
OG0017333	Cni	2	1	0.0198335
OG0017343	Cel	0	-1	0.286428
OG0017343	7	1	0	0.699357
OG0017343	Cbn	0	-1	0.381274
OG0017343	8	1	0	0.579948
OG0017343	Cre	0	-1	0.33055
OG0017343	9	1	0	0.746876
OG0017343	Cbr	0	-1	0.0756875
OG0017343	Cni	2	1	0.0198335
OG0017520	Cel	0	-1	0.286428
OG0017520	7	1	0	0.699357
OG0017520	Cbn	0	-1	0.381274
OG0017520	8	1	0	0.579948
OG0017520	Cre	0	-1	0.33055
OG0017520	9	1	0	0.746876
OG0017520	Cbr	2	1	0.0260688
OG0017520	Cni	0	-1	0.0580161
OG0017642	Cel	0	-1	0.286428
OG0017642	7	1	0	0.699357
OG0017642	Cbn	14	13	1.96292e-07
OG0017642	8	1	0	0.579948
OG0017642	Cre	1	0	0.732372
OG0017642	9	0	-1	0.349508
OG0017642	Cbr	0	0	0.5
OG0017642	Cni	0	0	0.5
OG0017651	Cel	0	-1	0.286428
OG0017651	7	2	1	0.106624
OG0017651	Cbn	13	11	1.12367e-05
OG0017651	8	2	0	0.641265
OG0017651	Cre	2	0	0.818195
OG0017651	9	0	-2	0.153559
OG0017651	Cbr	0	0	0.5
OG0017651	Cni	0	0	0.5
OG0017700	Cel	0	-1	0.286428
OG0017700	7	1	0	0.699357
OG0017700	Cbn	0	-1	0.381274
OG0017700	8	1	0	0.579948
OG0017700	Cre	15	14	4.66854e-09
OG0017700	9	0	-1	0.349508
OG0017700	Cbr	0	0	0.5
OG0017700	Cni	0	0	0.5
OG0017726	Cel	0	-1	0.286428
OG0017726	7	1	0	0.699357
OG0017726	Cbn	0	-1	0.381274
OG0017726	8	1	0	0.579948
OG0017726	Cre	15	14	4.66854e-09
OG0017726	9	0	-1	0.349508
OG0017726	Cbr	0	0	0.5
OG0017726	Cni	0	0	0.5
OG0017727	Cel	0	-1	0.286428
OG0017727	7	1	0	0.699357
OG0017727	Cbn	0	-1	0.381274
OG0017727	8	1	0	0.579948
OG0017727	Cre	15	14	4.66854e-09
OG0017727	9	0	-1	0.349508
OG0017727	Cbr	0	0	0.5
OG0017727	Cni	0	0	0.5
OG0017755	Cel	0	-1	0.286428
OG0017755	7	1	0	0.699357
OG0017755	Cbn	0	-1	0.381274
OG0017755	8	1	0	0.579948
OG0017755	Cre	0	-1	0.33055
OG0017755	9	1	0	0.746876
OG0017755	Cbr	0	-1	0.0756875
OG0017755	Cni	2	1	0.0198335
OG0017769	Cel	0	-1	0.286428
OG0017769	7	1	0	0.699357
OG0017769	Cbn	0	-1	0.381274
OG0017769	8	1	0	0.579948
OG0017769	Cre	0	-1	0.33055
OG0017769	9	1	0	0.746876
OG0017769	Cbr	0	-1	0.0756875
OG0017769	Cni	2	1	0.0198335
OG0017774	Cel	0	-1	0.286428
OG0017774	7	1	0	0.699357
OG0017774	Cbn	0	-1	0.381274
OG0017774	8	1	0	0.579948
OG0017774	Cre	0	-1	0.33055
OG0017774	9	1	0	0.746876
OG0017774	Cbr	0	-1	0.0756875
OG0017774	Cni	2	1	0.0198335
OG0017775	Cel	0	-1	0.286428
OG0017775	7	1	0	0.699357
OG0017775	Cbn	0	-1	0.381274
OG0017775	8	1	0	0.579948
OG0017775	Cre	0	-1	0.33055
OG0017775	9	1	0	0.746876
OG0017775	Cbr	0	-1	0.0756875
OG0017775	Cni	2	1	0.0198335
OG0017805	Cel	15	13	1.5446e-08
OG0017805	7	0	-2	0.0487552
OG0017805	Cbn	0	0	0.5
OG0017805	8	0	0	0.5
OG0017805	Cre	0	0	0.5
OG0017805	9	0	0	0.5
OG0017805	Cbr	0	0	0.5
OG0017805	Cni	0	0	0.5
OG0017983	Cel	0	-1	0.286428
OG0017983	7	1	0	0.699357
OG0017983	Cbn	14	13	1.96292e-07
OG0017983	8	0	-1	0.118181
OG0017983	Cre	0	0	0.5
OG0017983	9	0	0	0.5
OG0017983	Cbr	0	0	0.5
OG0017983	Cni	0	0	0.5
OG0017988	Cel	0	-1	0.286428
OG0017988	7	1	0	0.699357
OG0017988	Cbn	14	13	1.96292e-07
OG0017988	8	0	-1	0.118181
OG0017988	Cre	0	0	0.5
OG0017988	9	0	0	0.5
OG0017988	Cbr	0	0	0.5
OG0017988	Cni	0	0	0.5
OG0017997	Cel	0	-1	0.286428
OG0017997	7	1	0	0.699357
OG0017997	Cbn	1	0	0.77171
OG0017997	8	1	0	0.579948
OG0017997	Cre	13	12	6.48121e-08
OG0017997	9	0	-1	0.349508
OG0017997	Cbr	0	0	0.5
OG0017997	Cni	0	0	0.5
OG0018011	Cel	0	-1	0.286428
OG0018011	7	1	0	0.699357
OG0018011	Cbn	1	0	0.77171
OG0018011	8	1	0	0.579948
OG0018011	Cre	0	-1	0.33055
OG0018011	9	1	0	0.746876
OG0018011	Cbr	0	-1	0.0756875
OG0018011	Cni	2	1	0.0198335
OG0018059	Cel	0	-1	0.286428
OG0018059	7	1	0	0.699357
OG0018059	Cbn	0	-1	0.381274
OG0018059	8	1	0	0.579948
OG0018059	Cre	14	13	1.73948e-08
OG0018059	9	0	-1	0.349508
OG0018059	Cbr	0	0	0.5
OG0018059	Cni	0	0	0.5
OG0018073	Cel	0	-1	0.286428
OG0018073	7	1	0	0.699357
OG0018073	Cbn	0	-1	0.381274
OG0018073	8	1	0	0.579948
OG0018073	Cre	14	13	1.73948e-08
OG0018073	9	0	-1	0.349508
OG0018073	Cbr	0	0	0.5
OG0018073	Cni	0	0	0.5
OG0018118	Cel	0	-1	0.286428
OG0018118	7	1	0	0.699357
OG0018118	Cbn	0	-1	0.381274
OG0018118	8	1	0	0.579948
OG0018118	Cre	0	-1	0.33055
OG0018118	9	1	0	0.746876
OG0018118	Cbr	0	-1	0.0756875
OG0018118	Cni	3	2	0.000787977
OG0018128	Cel	0	-1	0.286428
OG0018128	7	1	0	0.699357
OG0018128	Cbn	0	-1	0.381274
OG0018128	8	1	0	0.579948
OG0018128	Cre	0	-1	0.33055
OG0018128	9	1	0	0.746876
OG0018128	Cbr	0	-1	0.0756875
OG0018128	Cni	2	1	0.0198335
OG0018277	Cel	0	-1	0.286428
OG0018277	7	1	0	0.699357
OG0018277	Cbn	13	12	6.05293e-07
OG0018277	8	0	-1	0.118181
OG0018277	Cre	0	0	0.5
OG0018277	9	0	0	0.5
OG0018277	Cbr	0	0	0.5
OG0018277	Cni	0	0	0.5
OG0018278	Cel	0	-1	0.286428
OG0018278	7	1	0	0.699357
OG0018278	Cbn	13	12	6.05293e-07
OG0018278	8	0	-1	0.118181
OG0018278	Cre	0	0	0.5
OG0018278	9	0	0	0.5
OG0018278	Cbr	0	0	0.5
OG0018278	Cni	0	0	0.5
OG0018294	Cel	0	-1	0.286428
OG0018294	7	1	0	0.699357
OG0018294	Cbn	13	12	6.05293e-07
OG0018294	8	0	-1	0.118181
OG0018294	Cre	0	0	0.5
OG0018294	9	0	0	0.5
OG0018294	Cbr	0	0	0.5
OG0018294	Cni	0	0	0.5
OG0018429	Cel	0	-1	0.286428
OG0018429	7	1	0	0.699357
OG0018429	Cbn	0	-1	0.381274
OG0018429	8	1	0	0.579948
OG0018429	Cre	0	-1	0.33055
OG0018429	9	1	0	0.746876
OG0018429	Cbr	0	-1	0.0756875
OG0018429	Cni	2	1	0.0198335
OG0018471	Cel	13	11	2.64427e-07
OG0018471	7	0	-2	0.0487552
OG0018471	Cbn	0	0	0.5
OG0018471	8	0	0	0.5
OG0018471	Cre	0	0	0.5
OG0018471	9	0	0	0.5
OG0018471	Cbr	0	0	0.5
OG0018471	Cni	0	0	0.5
OG0018472	Cel	13	11	2.64427e-07
OG0018472	7	0	-2	0.0487552
OG0018472	Cbn	0	0	0.5
OG0018472	8	0	0	0.5
OG0018472	Cre	0	0	0.5
OG0018472	9	0	0	0.5
OG0018472	Cbr	0	0	0.5
OG0018472	Cni	0	0	0.5
OG0018586	Cel	0	-1	0.286428
OG0018586	7	1	0	0.699357
OG0018586	Cbn	12	11	1.8665e-06
OG0018586	8	0	-1	0.118181
OG0018586	Cre	0	0	0.5
OG0018586	9	0	0	0.5
OG0018586	Cbr	0	0	0.5
OG0018586	Cni	0	0	0.5
OG0018595	Cel	0	-1	0.286428
OG0018595	7	1	0	0.699357
OG0018595	Cbn	12	11	1.8665e-06
OG0018595	8	0	-1	0.118181
OG0018595	Cre	0	0	0.5
OG0018595	9	0	0	0.5
OG0018595	Cbr	0	0	0.5
OG0018595	Cni	0	0	0.5
OG0018609	Cel	0	-1	0.286428
OG0018609	7	1	0	0.699357
OG0018609	Cbn	12	11	1.8665e-06
OG0018609	8	0	-1	0.118181
OG0018609	Cre	0	0	0.5
OG0018609	9	0	0	0.5
OG0018609	Cbr	0	0	0.5
OG0018609	Cni	0	0	0.5
OG0018643	Cel	0	-1	0.286428
OG0018643	7	1	0	0.699357
OG0018643	Cbn	0	-1	0.381274
OG0018643	8	1	0	0.579948
OG0018643	Cre	12	11	2.41487e-07
OG0018643	9	0	-1	0.349508
OG0018643	Cbr	0	0	0.5
OG0018643	Cni	0	0	0.5
OG0018650	Cel	0	-1	0.286428
OG0018650	7	1	0	0.699357
OG0018650	Cbn	0	-1	0.381274
OG0018650	8	1	0	0.579948
OG0018650	Cre	12	11	2.41487e-07
OG0018650	9	0	-1	0.349508
OG0018650	Cbr	0	0	0.5
OG0018650	Cni	0	0	0.5
OG0018758	Cel	0	-1	0.286428
OG0018758	7	1	0	0.699357
OG0018758	Cbn	0	-1	0.381274
OG0018758	8	1	0	0.579948
OG0018758	Cre	0	-1	0.33055
OG0018758	9	1	0	0.746876
OG0018758	Cbr	0	-1	0.0756875
OG0018758	Cni	3	2	0.000787977
OG0018903	Cel	0	-1	0.286428
OG0018903	7	1	0	0.699357
OG0018903	Cbn	11	10	5.75559e-06
OG0018903	8	0	-1	0.118181
OG0018903	Cre	0	0	0.5
OG0018903	9	0	0	0.5
OG0018903	Cbr	0	0	0.5
OG0018903	Cni	0	0	0.5
OG0018905	Cel	0	-1	0.286428
OG0018905	7	1	0	0.699357
OG0018905	Cbn	11	10	5.75559e-06
OG0018905	8	0	-1	0.118181
OG0018905	Cre	0	0	0.5
OG0018905	9	0	0	0.5
OG0018905	Cbr	0	0	0.5
OG0018905	Cni	0	0	0.5
OG0019030	Cel	0	-1	0.286428
OG0019030	7	1	0	0.699357
OG0019030	Cbn	0	-1	0.381274
OG0019030	8	1	0	0.579948
OG0019030	Cre	0	-1	0.33055
OG0019030	9	1	0	0.746876
OG0019030	Cbr	0	-1	0.0756875
OG0019030	Cni	2	1	0.0198335
OG0019056	Cel	0	-1	0.286428
OG0019056	7	1	0	0.699357
OG0019056	Cbn	0	-1	0.381274
OG0019056	8	1	0	0.579948
OG0019056	Cre	0	-1	0.33055
OG0019056	9	1	0	0.746876
OG0019056	Cbr	0	-1	0.0756875
OG0019056	Cni	2	1	0.0198335
OG0019095	Cel	0	-1	0.286428
OG0019095	7	1	0	0.699357
OG0019095	Cbn	0	-1	0.381274
OG0019095	8	1	0	0.579948
OG0019095	Cre	0	-1	0.33055
OG0019095	9	1	0	0.746876
OG0019095	Cbr	0	-1	0.0756875
OG0019095	Cni	2	1	0.0198335
OG0019260	Cel	0	-1	0.286428
OG0019260	7	1	0	0.699357
OG0019260	Cbn	10	9	1.77481e-05
OG0019260	8	0	-1	0.118181
OG0019260	Cre	0	0	0.5
OG0019260	9	0	0	0.5
OG0019260	Cbr	0	0	0.5
OG0019260	Cni	0	0	0.5
OG0019266	Cel	0	-1	0.286428
OG0019266	7	1	0	0.699357
OG0019266	Cbn	10	9	1.77481e-05
OG0019266	8	0	-1	0.118181
OG0019266	Cre	0	0	0.5
OG0019266	9	0	0	0.5
OG0019266	Cbr	0	0	0.5
OG0019266	Cni	0	0	0.5
OG0019426	Cel	0	-1	0.286428
OG0019426	7	1	0	0.699357
OG0019426	Cbn	0	-1	0.381274
OG0019426	8	1	0	0.579948
OG0019426	Cre	0	-1	0.33055
OG0019426	9	1	0	0.746876
OG0019426	Cbr	0	-1	0.0756875
OG0019426	Cni	2	1	0.0198335
OG0019552	Cel	0	-1	0.286428
OG0019552	7	1	0	0.699357
OG0019552	Cbn	0	-1	0.381274
OG0019552	8	1	0	0.579948
OG0019552	Cre	0	-1	0.33055
OG0019552	9	1	0	0.746876
OG0019552	Cbr	0	-1	0.0756875
OG0019552	Cni	2	1	0.0198335
OG0019746	Cel	0	-1	0.286428
OG0019746	7	1	0	0.699357
OG0019746	Cbn	9	8	5.47286e-05
OG0019746	8	0	-1	0.118181
OG0019746	Cre	0	0	0.5
OG0019746	9	0	0	0.5
OG0019746	Cbr	0	0	0.5
OG0019746	Cni	0	0	0.5
OG0019754	Cel	0	-1	0.286428
OG0019754	7	1	0	0.699357
OG0019754	Cbn	9	8	5.47286e-05
OG0019754	8	0	-1	0.118181
OG0019754	Cre	0	0	0.5
OG0019754	9	0	0	0.5
OG0019754	Cbr	0	0	0.5
OG0019754	Cni	0	0	0.5
OG0019760	Cel	0	-1	0.286428
OG0019760	7	1	0	0.699357
OG0019760	Cbn	9	8	5.47286e-05
OG0019760	8	0	-1	0.118181
OG0019760	Cre	0	0	0.5
OG0019760	9	0	0	0.5
OG0019760	Cbr	0	0	0.5
OG0019760	Cni	0	0	0.5
OG0019761	Cel	0	-1	0.286428
OG0019761	7	1	0	0.699357
OG0019761	Cbn	9	8	5.47286e-05
OG0019761	8	0	-1	0.118181
OG0019761	Cre	0	0	0.5
OG0019761	9	0	0	0.5
OG0019761	Cbr	0	0	0.5
OG0019761	Cni	0	0	0.5
OG0019779	Cel	0	-1	0.286428
OG0019779	7	1	0	0.699357
OG0019779	Cbn	9	8	5.47286e-05
OG0019779	8	0	-1	0.118181
OG0019779	Cre	0	0	0.5
OG0019779	9	0	0	0.5
OG0019779	Cbr	0	0	0.5
OG0019779	Cni	0	0	0.5
OG0019833	Cel	0	-1	0.286428
OG0019833	7	1	0	0.699357
OG0019833	Cbn	0	-1	0.381274
OG0019833	8	1	0	0.579948
OG0019833	Cre	9	8	1.24912e-05
OG0019833	9	0	-1	0.349508
OG0019833	Cbr	0	0	0.5
OG0019833	Cni	0	0	0.5
OG0019842	Cel	0	-1	0.286428
OG0019842	7	1	0	0.699357
OG0019842	Cbn	0	-1	0.381274
OG0019842	8	1	0	0.579948
OG0019842	Cre	1	0	0.732372
OG0019842	9	1	0	0.746876
OG0019842	Cbr	0	-1	0.0756875
OG0019842	Cni	3	2	0.000787977
OG0019851	Cel	0	-1	0.286428
OG0019851	7	1	0	0.699357
OG0019851	Cbn	0	-1	0.381274
OG0019851	8	1	0	0.579948
OG0019851	Cre	9	8	1.24912e-05
OG0019851	9	0	-1	0.349508
OG0019851	Cbr	0	0	0.5
OG0019851	Cni	0	0	0.5
OG0019853	Cel	0	-1	0.286428
OG0019853	7	1	0	0.699357
OG0019853	Cbn	0	-1	0.381274
OG0019853	8	1	0	0.579948
OG0019853	Cre	9	8	1.24912e-05
OG0019853	9	0	-1	0.349508
OG0019853	Cbr	0	0	0.5
OG0019853	Cni	0	0	0.5
OG0020195	Cel	0	-1	0.286428
OG0020195	7	1	0	0.699357
OG0020195	Cbn	0	-1	0.381274
OG0020195	8	1	0	0.579948
OG0020195	Cre	0	-1	0.33055
OG0020195	9	1	0	0.746876
OG0020195	Cbr	0	-1	0.0756875
OG0020195	Cni	2	1	0.0198335
OG0020450	Cel	0	-1	0.286428
OG0020450	7	1	0	0.699357
OG0020450	Cbn	8	7	0.000168763
OG0020450	8	0	-1	0.118181
OG0020450	Cre	0	0	0.5
OG0020450	9	0	0	0.5
OG0020450	Cbr	0	0	0.5
OG0020450	Cni	0	0	0.5
OG0020459	Cel	0	-1	0.286428
OG0020459	7	1	0	0.699357
OG0020459	Cbn	8	7	0.000168763
OG0020459	8	0	-1	0.118181
OG0020459	Cre	0	0	0.5
OG0020459	9	0	0	0.5
OG0020459	Cbr	0	0	0.5
OG0020459	Cni	0	0	0.5
OG0020462	Cel	0	-1	0.286428
OG0020462	7	1	0	0.699357
OG0020462	Cbn	8	7	0.000168763
OG0020462	8	0	-1	0.118181
OG0020462	Cre	0	0	0.5
OG0020462	9	0	0	0.5
OG0020462	Cbr	0	0	0.5
OG0020462	Cni	0	0	0.5
OG0020465	Cel	0	-1	0.286428
OG0020465	7	1	0	0.699357
OG0020465	Cbn	8	7	0.000168763
OG0020465	8	0	-1	0.118181
OG0020465	Cre	0	0	0.5
OG0020465	9	0	0	0.5
OG0020465	Cbr	0	0	0.5
OG0020465	Cni	0	0	0.5
OG0020558	Cel	0	-1	0.286428
OG0020558	7	1	0	0.699357
OG0020558	Cbn	0	-1	0.381274
OG0020558	8	1	0	0.579948
OG0020558	Cre	8	7	4.65417e-05
OG0020558	9	0	-1	0.349508
OG0020558	Cbr	0	0	0.5
OG0020558	Cni	0	0	0.5
OG0020562	Cel	0	-1	0.286428
OG0020562	7	1	0	0.699357
OG0020562	Cbn	0	-1	0.381274
OG0020562	8	1	0	0.579948
OG0020562	Cre	8	7	4.65417e-05
OG0020562	9	0	-1	0.349508
OG0020562	Cbr	0	0	0.5
OG0020562	Cni	0	0	0.5
OG0020568	Cel	1	0	0.699357
OG0020568	7	1	0	0.699357
OG0020568	Cbn	0	-1	0.381274
OG0020568	8	1	0	0.579948
OG0020568	Cre	7	6	0.000173412
OG0020568	9	0	-1	0.349508
OG0020568	Cbr	0	0	0.5
OG0020568	Cni	0	0	0.5
OG0020572	Cel	0	-1	0.286428
OG0020572	7	1	0	0.699357
OG0020572	Cbn	0	-1	0.381274
OG0020572	8	1	0	0.579948
OG0020572	Cre	8	7	4.65417e-05
OG0020572	9	0	-1	0.349508
OG0020572	Cbr	0	0	0.5
OG0020572	Cni	0	0	0.5
OG0020579	Cel	0	-1	0.286428
OG0020579	7	1	0	0.699357
OG0020579	Cbn	0	-1	0.381274
OG0020579	8	1	0	0.579948
OG0020579	Cre	8	7	4.65417e-05
OG0020579	9	0	-1	0.349508
OG0020579	Cbr	0	0	0.5
OG0020579	Cni	0	0	0.5
OG0020591	Cel	1	0	0.699357
OG0020591	7	1	0	0.699357
OG0020591	Cbn	0	-1	0.381274
OG0020591	8	1	0	0.579948
OG0020591	Cre	7	6	0.000173412
OG0020591	9	0	-1	0.349508
OG0020591	Cbr	0	0	0.5
OG0020591	Cni	0	0	0.5
OG0020603	Cel	0	-1	0.286428
OG0020603	7	1	0	0.699357
OG0020603	Cbn	0	-1	0.381274
OG0020603	8	1	0	0.579948
OG0020603	Cre	1	0	0.732372
OG0020603	9	1	0	0.746876
OG0020603	Cbr	0	-1	0.0756875
OG0020603	Cni	2	1	0.0198335
OG0020877	Cel	0	-1	0.286428
OG0020877	7	1	0	0.699357
OG0020877	Cbn	0	-1	0.381274
OG0020877	8	1	0	0.579948
OG0020877	Cre	0	-1	0.33055
OG0020877	9	1	0	0.746876
OG0020877	Cbr	0	-1	0.0756875
OG0020877	Cni	3	2	0.000787977
OG0021171	Cel	0	-1	0.286428
OG0021171	7	1	0	0.699357
OG0021171	Cbn	7	6	0.000520402
OG0021171	8	0	-1	0.118181
OG0021171	Cre	0	0	0.5
OG0021171	9	0	0	0.5
OG0021171	Cbr	0	0	0.5
OG0021171	Cni	0	0	0.5
OG0021185	Cel	0	-1	0.286428
OG0021185	7	1	0	0.699357
OG0021185	Cbn	7	6	0.000520402
OG0021185	8	0	-1	0.118181
OG0021185	Cre	0	0	0.5
OG0021185	9	0	0	0.5
OG0021185	Cbr	0	0	0.5
OG0021185	Cni	0	0	0.5
OG0021191	Cel	0	-1	0.286428
OG0021191	7	1	0	0.699357
OG0021191	Cbn	7	6	0.000520402
OG0021191	8	0	-1	0.118181
OG0021191	Cre	0	0	0.5
OG0021191	9	0	0	0.5
OG0021191	Cbr	0	0	0.5
OG0021191	Cni	0	0	0.5
OG0021206	Cel	0	-1	0.286428
OG0021206	7	1	0	0.699357
OG0021206	Cbn	7	6	0.000520402
OG0021206	8	0	-1	0.118181
OG0021206	Cre	0	0	0.5
OG0021206	9	0	0	0.5
OG0021206	Cbr	0	0	0.5
OG0021206	Cni	0	0	0.5
OG0021272	Cel	0	-1	0.286428
OG0021272	7	1	0	0.699357
OG0021272	Cbn	0	-1	0.381274
OG0021272	8	1	0	0.579948
OG0021272	Cre	7	6	0.000173412
OG0021272	9	0	-1	0.349508
OG0021272	Cbr	0	0	0.5
OG0021272	Cni	0	0	0.5
OG0022035	Cel	0	-1	0.286428
OG0022035	7	1	0	0.699357
OG0022035	Cbn	0	-1	0.381274
OG0022035	8	1	0	0.579948
OG0022035	Cre	6	5	0.000646125
OG0022035	9	0	-1	0.349508
OG0022035	Cbr	0	0	0.5
OG0022035	Cni	0	0	0.5
OG0022036	Cel	0	-1	0.286428
OG0022036	7	1	0	0.699357
OG0022036	Cbn	0	-1	0.381274
OG0022036	8	1	0	0.579948
OG0022036	Cre	6	5	0.000646125
OG0022036	9	0	-1	0.349508
OG0022036	Cbr	0	0	0.5
OG0022036	Cni	0	0	0.5
OG0022540	Cel	0	-1	0.286428
OG0022540	7	1	0	0.699357
OG0022540	Cbn	0	-1	0.381274
OG0022540	8	1	0	0.579948
OG0022540	Cre	0	-1	0.33055
OG0022540	9	1	0	0.746876
OG0022540	Cbr	0	-1	0.0756875
OG0022540	Cni	2	1	0.0198335
OG0022923	Cel	0	-1	0.286428
OG0022923	7	1	0	0.699357
OG0022923	Cbn	0	-1	0.381274
OG0022923	8	1	0	0.579948
OG0022923	Cre	2	1	0.124528
OG0022923	9	1	0	0.746876
OG0022923	Cbr	0	-1	0.0756875
OG0022923	Cni	2	1	0.0198335
